# Supplementary material for: Efficient aerobic oxidation of benzyl alcohols using a magnetically recoverable Ni/nitrogen-containing carbon nanocomposite
Source: Royal Society of Chemistry journal article supplement (doi:10.1039/d6ra02052f), 2026-05-21
Supplement: d6ra02052f1.pdf [file d6ra02052f1.pdf]

## Supporting Information

### **Efficient Aerobic Oxidation of Benzyl Alcohols Using a Magnetically Recoverable Ni/Nitrogen-Containing Carbon Nanocomposite**

Arumugam Dinesh Babu <sup>a</sup> and K. Santhakumar <sup>\*a</sup>

<sup>a</sup>Department of Chemistry, School of Advanced Sciences, Vellore Institute of Technology, Vellore - 632014, India.

Email: [ksanthakumar@vit.ac.in](mailto:ksanthakumar@vit.ac.in)

## Table of contents

|                                                                   |     |
|-------------------------------------------------------------------|-----|
| 1. XPS spectra                                                    | S3  |
| 2. NMR Spectral data                                              | S3  |
| 3. NMR spectra of synthesized compounds                           | S7  |
| 4. Zero Pass of optimized condition CHEM21 green metrics toolkit  | S29 |
| 5. First Pass of optimized condition CHEM21 green metrics toolkit | S30 |
| 6. References                                                     | S32 |

## 1. XPS spectra

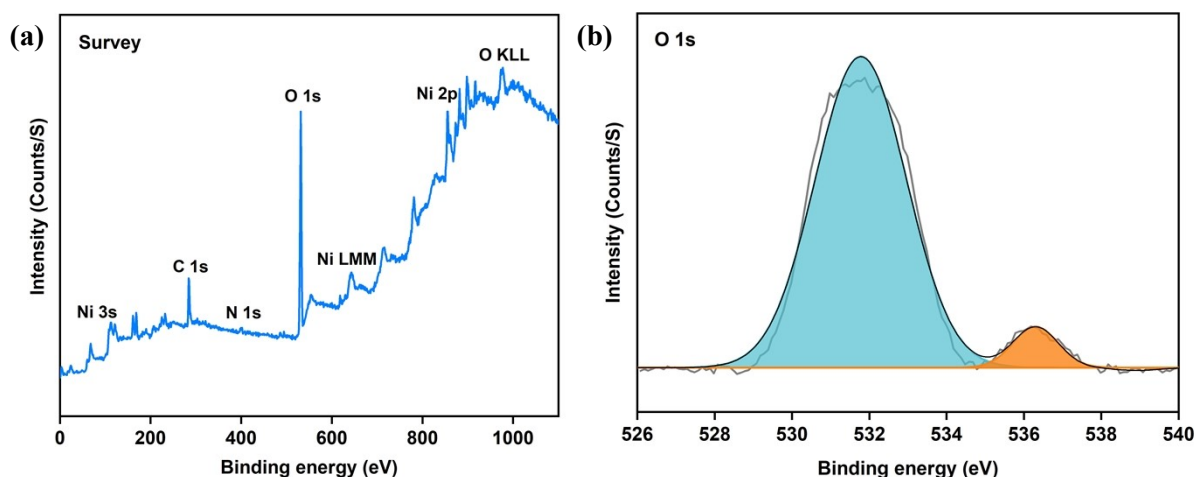

Fig. S1 (a) XPS survey and (b) O1s of Ni/PDC catalyst.

## 1. NMR Spectral data

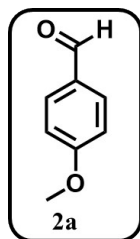

**4-methoxybenzaldehyde (2a):**  $^1\text{H}$  NMR (400 MHz,  $\text{CDCl}_3$ )  $\delta$  9.89 (s, 1H), 7.85 (d,  $J = 8.4$  Hz, 2H), 7.01 (d,  $J = 8.4$  Hz, 2H), 3.90 (s, 3H).  $^{13}\text{C}$  NMR (101 MHz,  $\text{CDCl}_3$ )  $\delta$  190.87, 164.63, 132.02, 129.98, 114.33, 55.61.<sup>1</sup>

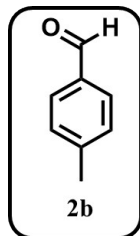

**4-methylbenzaldehyde (2b):**  $^1\text{H}$  NMR (400 MHz,  $\text{CDCl}_3$ )  $\delta$  9.96 (s, 1H), 7.78 (d,  $J = 8.0$  Hz, 2H), 7.33 (d,  $J = 7.8$  Hz, 2H), 2.44 (s, 3H).  $^{13}\text{C}$  NMR (101 MHz,  $\text{CDCl}_3$ )  $\delta$  192.94, 145.56, 134.08, 129.12, 129.05, 129.00, 128.94, 128.89, 22.53.<sup>1</sup>

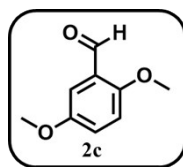

**2,5-dimethoxybenzaldehyde (2c):**  $^1\text{H}$  NMR (400 MHz,  $\text{CDCl}_3$ )  $\delta$  10.45 (s, 1H), 7.33 (d,  $J = 3.3$  Hz, 1H), 7.14 (dd,  $J = 9.1, 3.3$  Hz, 1H), 6.95 (d,  $J = 9.0$  Hz, 1H), 3.90 (s, 3H), 3.81 (s, 3H).  $^{13}\text{C}$  NMR (101 MHz,  $\text{CDCl}_3$ )  $\delta$  189.63, 156.74, 153.61, 124.93, 123.54, 113.36, 110.40, 56.18, 55.84.<sup>2</sup>

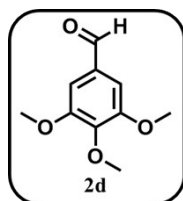

**3,4,5-trimethoxybenzaldehyde (2d):**  $^1\text{H}$  NMR (400 MHz,  $\text{CDCl}_3$ )  $\delta$  9.88 (t,  $J = 1.9$  Hz, 1H), 7.14 (d,  $J = 2.1$  Hz, 2H), 3.94 (d,  $J = 2.6$  Hz, 9H).  $^{13}\text{C}$  NMR (101 MHz,  $\text{CDCl}_3$ )  $\delta$  191.08, 153.66, 143.60, 131.72, 106.71, 61.01, 56.28.

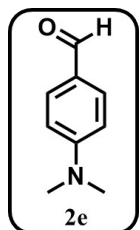

**4-(dimethylamino)benzaldehyde (2e):**  $^1\text{H}$  NMR (500 MHz,  $\text{CDCl}_3$ )  $\delta$  9.74 (s, 1H), 7.73 (d,  $J = 8.9$  Hz, 2H), 6.70 (d,  $J = 8.7$  Hz, 2H), 3.08 (s, 6H).  $^{13}\text{C}$  NMR (101 MHz,  $\text{CDCl}_3$ )  $\delta$  190.4, 154.4, 132.0, 125.1, 111.1, 40.1.<sup>3</sup>

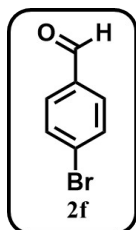

**4-bromobenzaldehyde (2f):**  $^1\text{H}$  NMR (400 MHz,  $\text{CDCl}_3$ )  $\delta$  9.98 (s, 1H), 7.76 (d,  $J = 8.5$  Hz, 2H), 7.69 (d,  $J = 8.5$  Hz, 2H).  $^{13}\text{C}$  NMR (101 MHz,  $\text{CDCl}_3$ )  $\delta$  191.14, 135.07, 132.47, 131.00, 129.82.<sup>3</sup>

1H), 7.83  
 $\text{CDCl}_3$ )  $\delta$

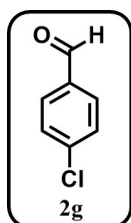

**4-chlorobenzaldehyde (2g):**  $^1\text{H}$  NMR (400 MHz,  $\text{CDCl}_3$ )  $\delta$  9.99 (s, 1H), 7.83 (d,  $J = 8.4$  Hz, 2H), 7.53 (d,  $J = 8.2$  Hz, 2H).  $^{13}\text{C}$  NMR (101 MHz,  $\text{CDCl}_3$ )  $\delta$  190.93, 141.00, 134.71, 130.94, 129.49.<sup>1</sup>

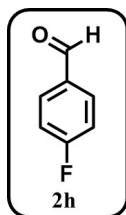

**4-fluorobenzaldehyde (2h):**  $^1\text{H}$  NMR (400 MHz,  $\text{CDCl}_3$ )  $\delta$  9.94 (s, 1H), 7.89 (dd,  $J = 8.8, 5.4$  Hz, 2H), 7.18 (t,  $J = 8.6$  Hz, 2H).  $^{13}\text{C}$  NMR (101 MHz,  $\text{CDCl}_3$ )  $\delta$  190.60, 167.78, 165.23, 132.28, 132.19, 116.43, 116.21.<sup>4</sup>

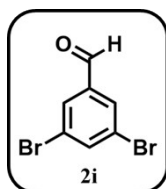

**3,5-dibromobenzaldehyde (2i):**  $^1\text{H}$  NMR (400 MHz,  $\text{CDCl}_3$ )  $\delta$  9.91 (s, 1H), 7.94 (d,  $J = 1.8$  Hz, 2H), 7.93 – 7.91 (m, 1H).  $^{13}\text{C}$  NMR (101 MHz,  $\text{CDCl}_3$ )  $\delta$  189.22, 139.60, 138.89, 131.89, 131.22, 123.95, 123.16.

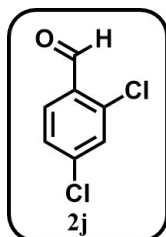

**2,4-dichlorobenzaldehyde (2j):**  $^1\text{H}$  NMR (400 MHz,  $\text{CDCl}_3$ )  $\delta$  10.43 (s, 1H), 7.89 (d,  $J = 8.3$  Hz, 1H), 7.50 (s, 1H), 7.40 (ddd,  $J = 8.3, 2.0, 0.9$  Hz, 1H).  $^{13}\text{C}$  NMR (101 MHz,  $\text{CDCl}_3$ )  $\delta$  188.55, 141.13, 138.56, 130.94, 130.48, 130.34, 127.98.

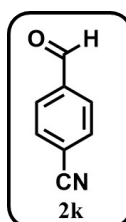

**4-formylbenzonitrile (2k):**  $^1\text{H}$  NMR (400 MHz,  $\text{CDCl}_3$ )  $\delta$  10.12 (s, 1H), 8.03 – 8.00 (m, 2H), 7.89 – 7.82 (m, 2H).  $^{13}\text{C}$  NMR (101 MHz,  $\text{CDCl}_3$ )  $\delta$  190.65, 138.75, 132.92, 129.91, 117.73, 117.62.<sup>4</sup>

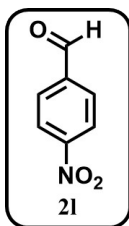

**4-nitrobenzaldehyde (2l):** <sup>1</sup>H NMR (400 MHz, CDCl<sub>3</sub>) δ 10.17 (s, 1H), 8.41 (d, *J* = 8.3 Hz, 2H), 8.09 (d, *J* = 8.3 Hz, 2H). <sup>13</sup>C NMR (101 MHz, CDCl<sub>3</sub>) δ 190.32, 140.05, 130.51, 124.34.<sup>3</sup>

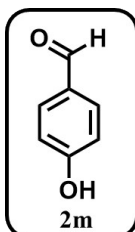

**4-hydroxybenzaldehyde (2m):** <sup>1</sup>H NMR (400 MHz, CDCl<sub>3</sub>) δ 9.89 (s, 1H), 7.87 – 7.83 (m, 2H), 7.03 – 6.99 (m, 2H), 6.46 (s, 1H). <sup>13</sup>C NMR (101 MHz, CDCl<sub>3</sub>) δ 191.36, 161.68, 132.58, 129.82, 116.05.<sup>5</sup>

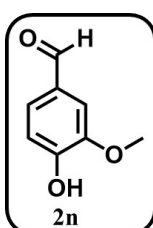

**4-hydroxy-3-methoxybenzaldehyde (2n):** <sup>1</sup>H NMR (400 MHz, CDCl<sub>3</sub>) δ 9.84 (s, 1H), 7.44 (dt, *J* = 6.8, 0.9 Hz, 2H), 7.06 (dd, *J* = 8.6, 1.1 Hz, 1H), 6.50 – 6.34 (m, 1H), 3.97 (d, *J* = 1.9 Hz, 3H). <sup>13</sup>C NMR (101 MHz, CDCl<sub>3</sub>) δ 191.02, 151.78, 147.21, 129.84, 127.59, 114.45, 108.82, 56.13.<sup>6</sup>

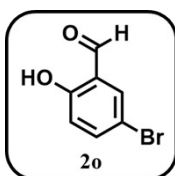

**5-bromo-2-hydroxybenzaldehyde (2o):** <sup>1</sup>H NMR (400 MHz, CDCl<sub>3</sub>) δ 10.94 (s, 1H), 9.85 (s, 1H), 7.68 (d, *J* = 2.2 Hz, 1H), 7.61 (dd, *J* = 8.9, 2.4 Hz, 1H), 6.91 (d, *J* = 8.9 Hz, 1H). <sup>13</sup>C NMR (101 MHz, CDCl<sub>3</sub>) δ 195.47, 160.58, 139.73, 135.66, 121.75, 119.84, 111.39.

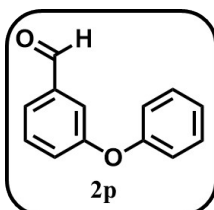

**3-phenoxybenzaldehyde (2p):** <sup>1</sup>H NMR (500 MHz, CDCl<sub>3</sub>) δ 9.97 (s, 1H), 7.62 (d, *J* = 7.5 Hz, 1H), 7.55 – 7.46 (m, 2H), 7.42 – 7.37 (m, 2H), 7.31 (dt, *J* = 8.0, 1.3 Hz, 1H), 7.22 – 7.16 (m, 1H), 7.07 (d, *J* = 8.2 Hz, 2H). <sup>13</sup>C NMR (101 MHz, CDCl<sub>3</sub>) δ 191.66, 158.43, 156.22, 138.09, 130.46, 130.07, 124.72, 124.60, 124.21, 119.51, 118.15.

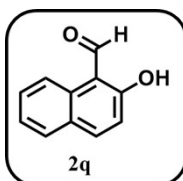

**2-hydroxy-1-naphthaldehyde (2q):** <sup>1</sup>H NMR (400 MHz, CDCl<sub>3</sub>) δ 13.16 (s, 1H), 10.80 (s, 1H), 8.33 (d, *J* = 8.5 Hz, 1H), 7.97 (d, *J* = 9.1 Hz, 1H), 7.79 (dd, *J* = 8.1, 1.3 Hz, 1H), 7.64 – 7.58 (m, 1H), 7.43 (t, *J* = 7.7 Hz, 1H), 7.13 (d, *J* = 9.1 Hz, 1H). <sup>13</sup>C NMR (101 MHz, CDCl<sub>3</sub>) δ 193.31, 164.97, 139.19, 132.91, 129.51, 129.15, 127.83, 124.53, 119.21, 118.62, 111.30.

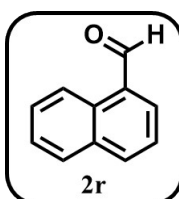

**1-naphthaldehyde (2r):** <sup>1</sup>H NMR (500 MHz, CDCl<sub>3</sub>) δ 10.32 (s, 1H), 9.26 (d, *J* = 8.6 Hz, 1H), 7.97 (d, *J* = 8.4 Hz, 1H), 7.88 – 7.81 (m, 2H), 7.67 – 7.61 (m, 1H), 7.56 – 7.47 (m, 2H). <sup>13</sup>C NMR (101 MHz, CDCl<sub>3</sub>) δ 193.60, 136.71, 135.33, 133.74, 131.41, 130.55, 129.10, 128.51, 126.99, 124.90.<sup>1</sup>

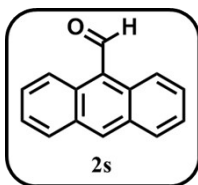

**anthracene-9-carbaldehyde (2s):**  $^1\text{H}$  NMR (500 MHz,  $\text{CDCl}_3$ )  $\delta$  11.48 (s, 1H), 8.96 (d,  $J = 9.0$  Hz, 2H), 8.61 (s, 1H), 8.02 (d,  $J = 8.5$  Hz, 2H), 7.69 – 7.64 (m, 2H), 7.56 – 7.51 (m, 2H).  $^{13}\text{C}$  NMR (101 MHz,  $\text{CDCl}_3$ )  $\delta$  192.99, 135.22, 132.11, 131.04, 129.28, 129.11, 125.67, 124.66, 123.52.<sup>3</sup>

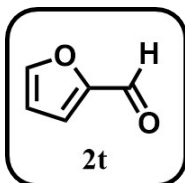

**furan-2-carbaldehyde (2t):**  $^1\text{H}$  NMR (400 MHz,  $\text{CDCl}_3$ )  $\delta$  9.67 (s, 1H), 7.71 (s, 1H), 7.27 (d,  $J = 3.6$  Hz, 1H), 6.66 – 6.58 (m, 1H).  $^{13}\text{C}$  NMR (101 MHz,  $\text{CDCl}_3$ )  $\delta$  177.94, 152.97, 148.13, 121.12, 112.62.<sup>3</sup>

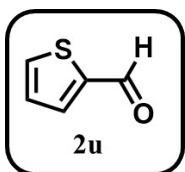

**thiophene-2-carbaldehyde (2u):**  $^1\text{H}$  NMR (400 MHz,  $\text{CDCl}_3$ )  $\delta$  9.95 (s, 1H), 7.82 – 7.75 (m, 2H), 7.25 – 7.20 (m, 1H).  $^{13}\text{C}$  NMR (101 MHz,  $\text{CDCl}_3$ )  $\delta$  183.09, 144.01, 136.43, 135.20, 128.37.<sup>1</sup>

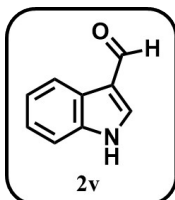

**1H-indole-3-carbaldehyde (2v):**  $^1\text{H}$  NMR (400 MHz, DMSO)  $\delta$  9.94 (s, 1H), 8.29 (s, 1H), 8.10 (d,  $J = 7.9$  Hz, 1H), 7.52 (d,  $J = 8.3$  Hz, 1H), 7.29 – 7.20 (m, 2H).  $^{13}\text{C}$  NMR (101 MHz, DMSO)  $\delta$  185.39, 139.00, 137.62, 124.63, 123.89, 122.56, 121.28, 118.63, 112.93.

## 2. NMR Spectra of synthesized compounds

### <sup>1</sup>H NMR spectra of product 2a

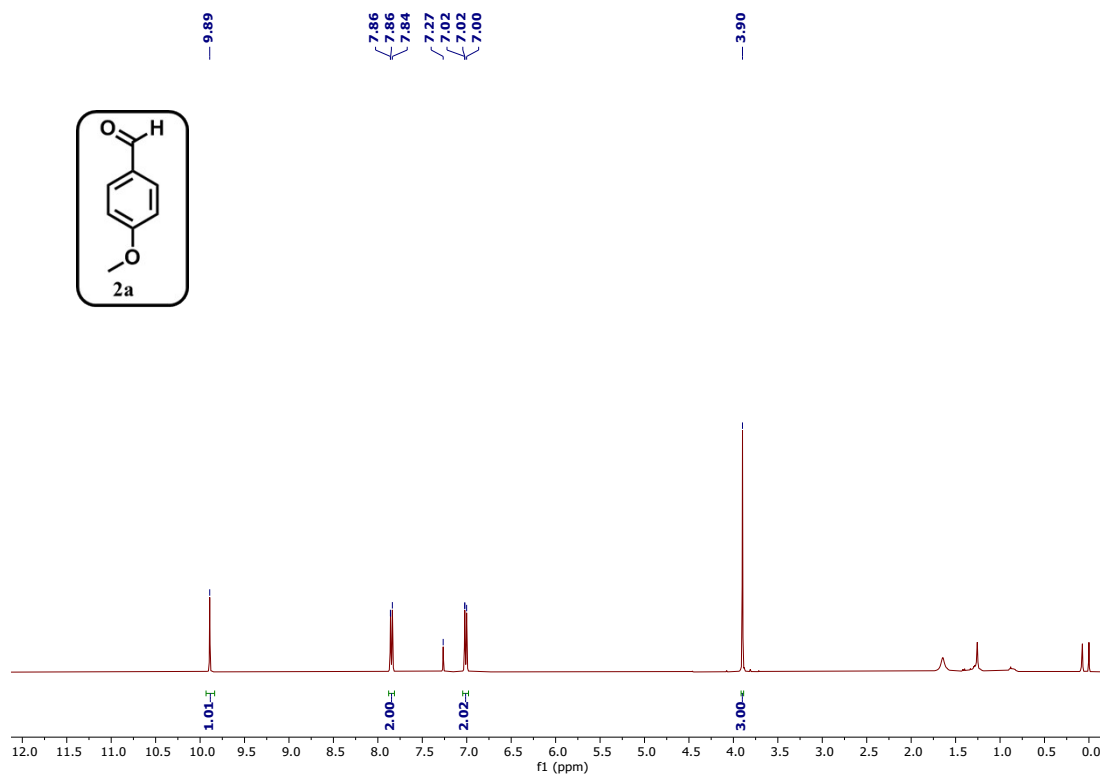

### <sup>13</sup>C NMR spectra of product 2a

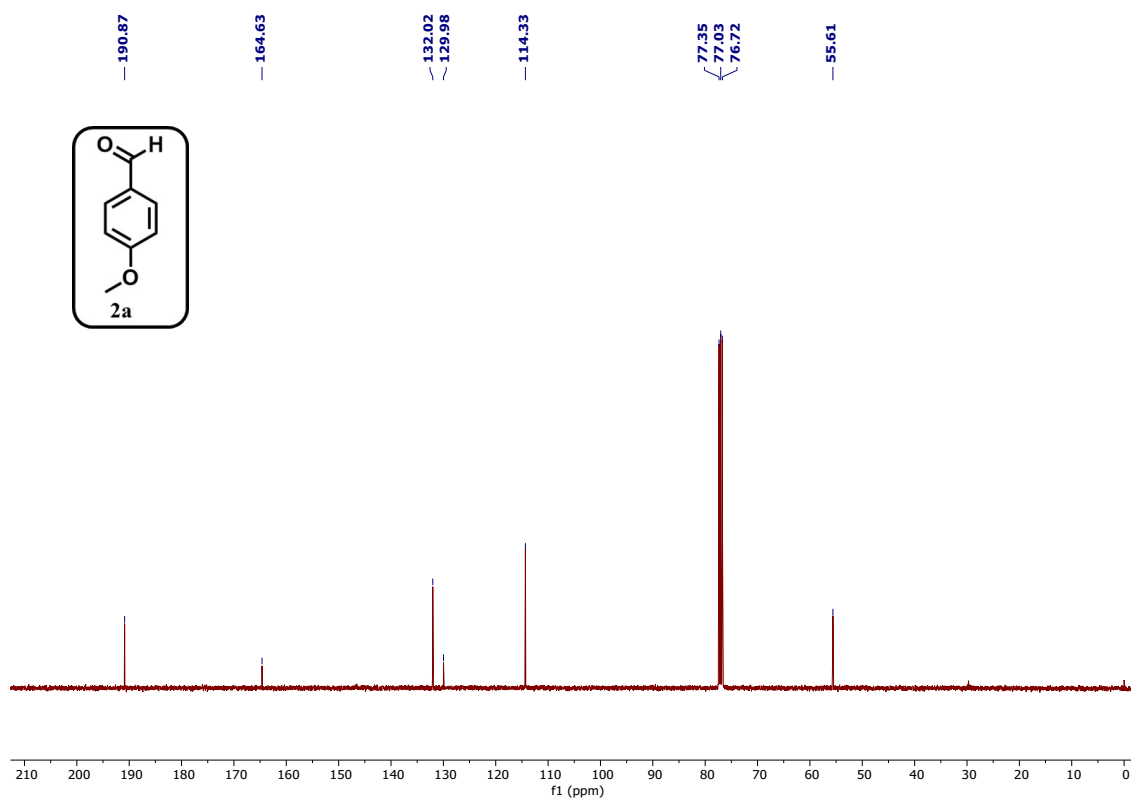

## $^1\text{H}$ NMR spectra of product 2b

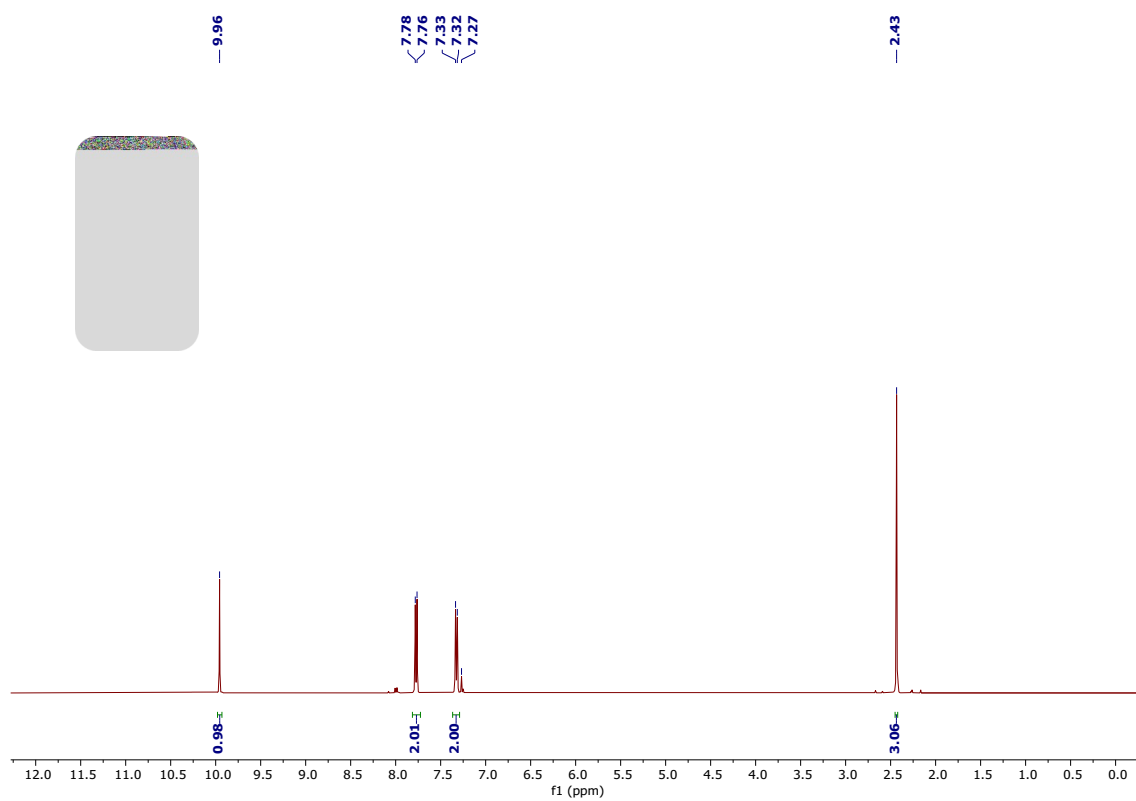

## $^{13}\text{C}$ NMR spectra of product 2b

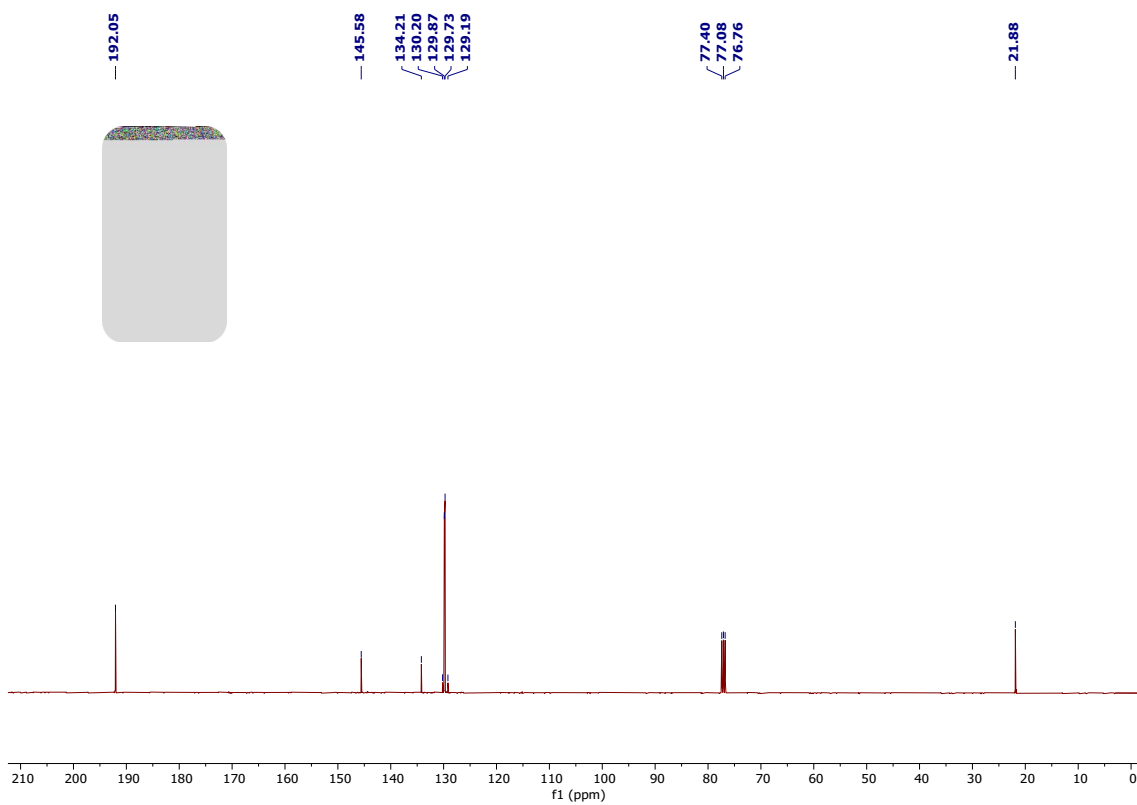

## <sup>1</sup>H NMR spectra of product 2c

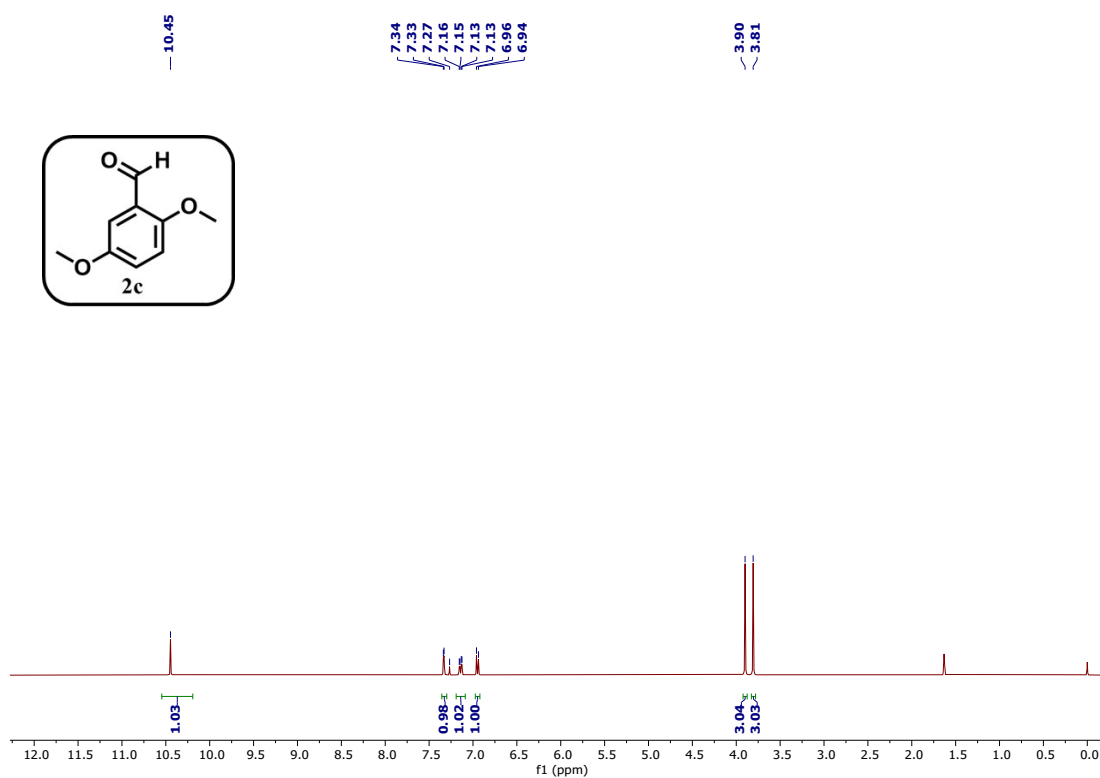

## <sup>13</sup>C NMR spectra of product 2c

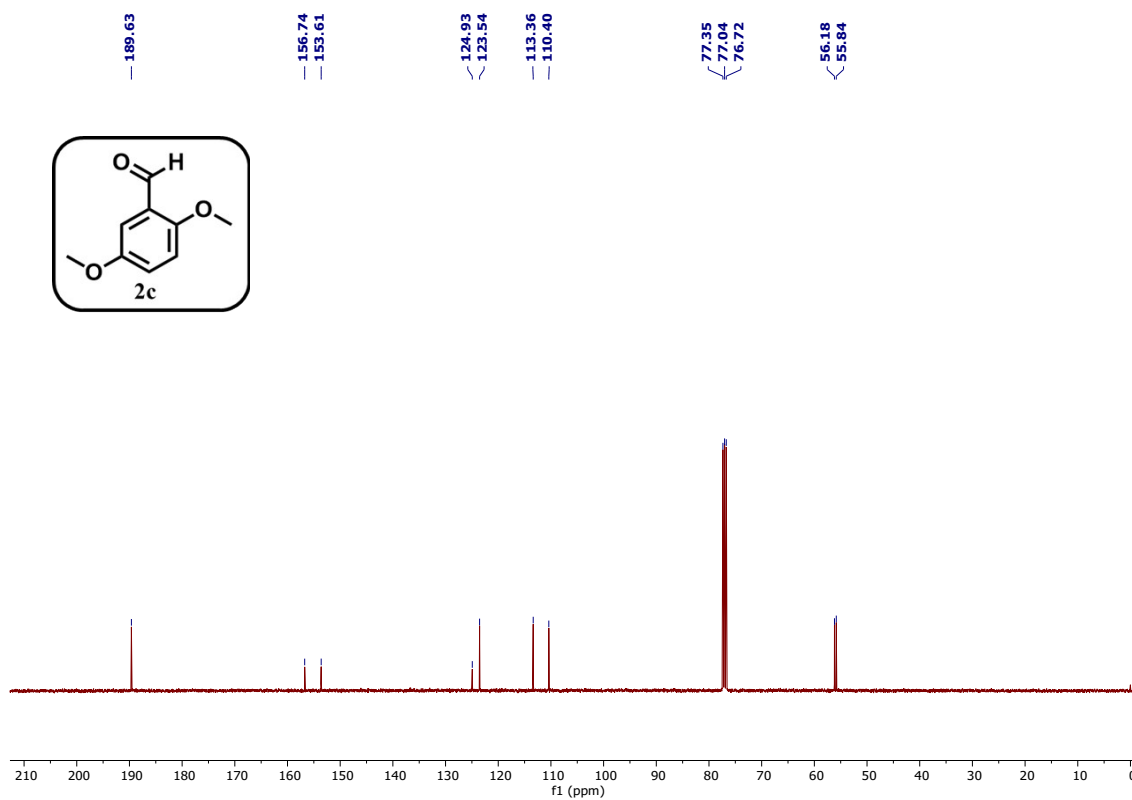

## <sup>1</sup>H NMR spectra of product 2d

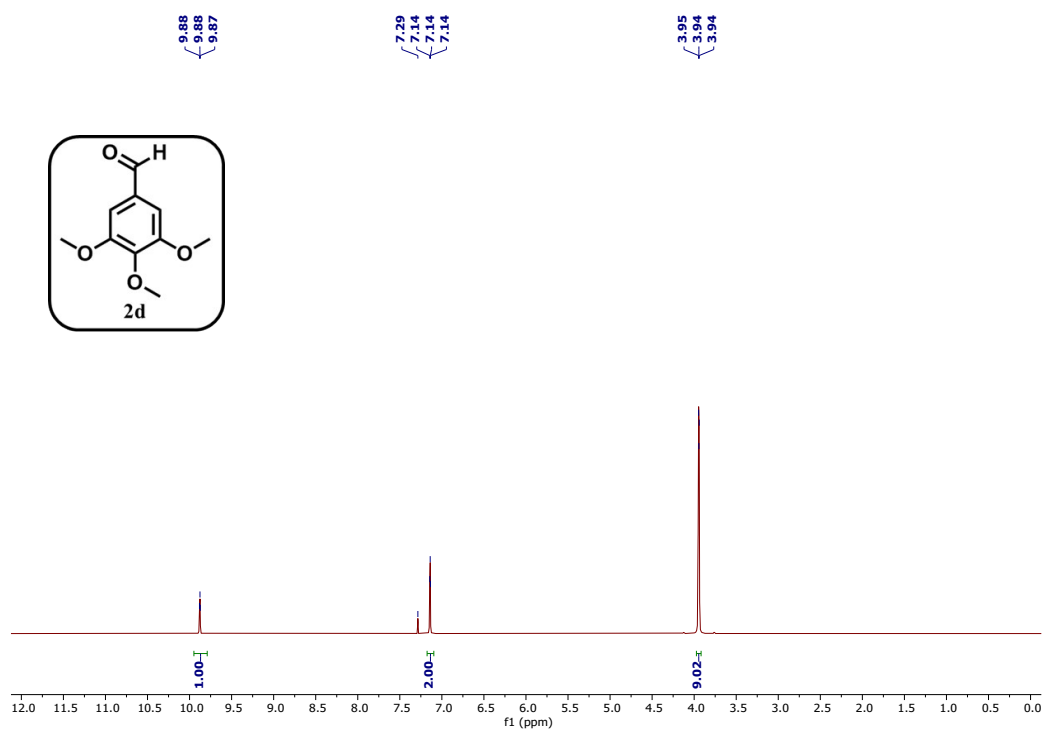

## <sup>13</sup>C NMR spectra of product 2d

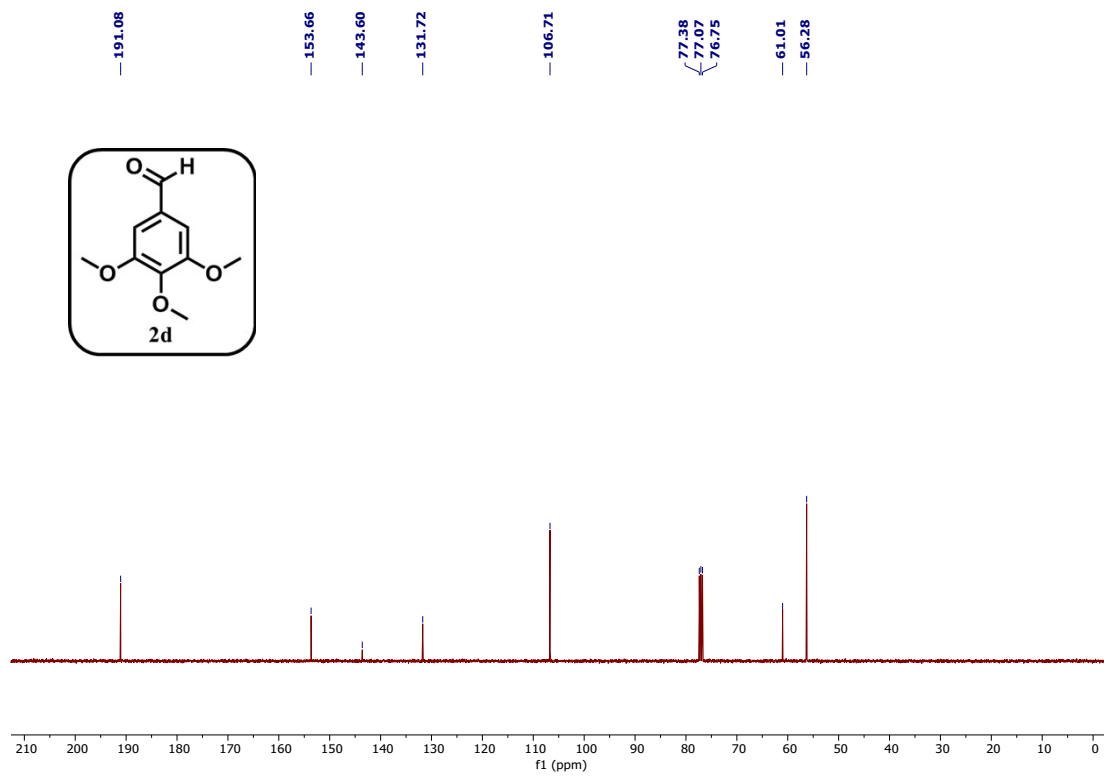

### <sup>1</sup>H NMR spectra of product 2e

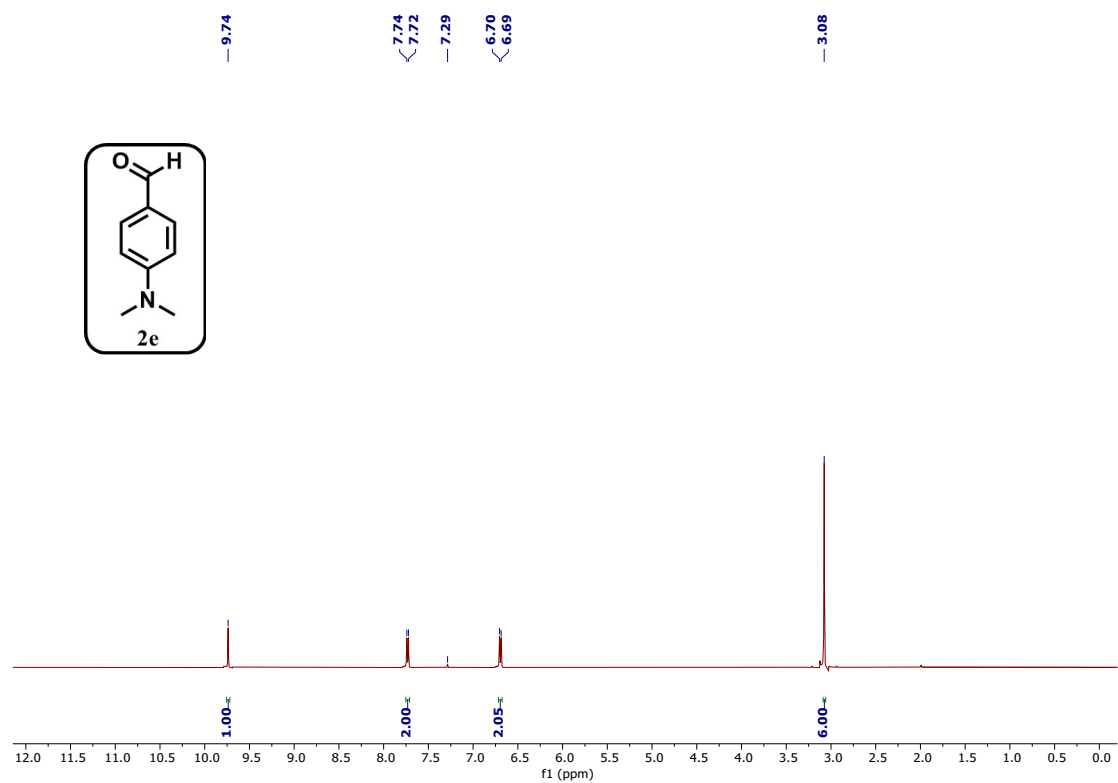

### <sup>13</sup>C NMR spectra of product 2e

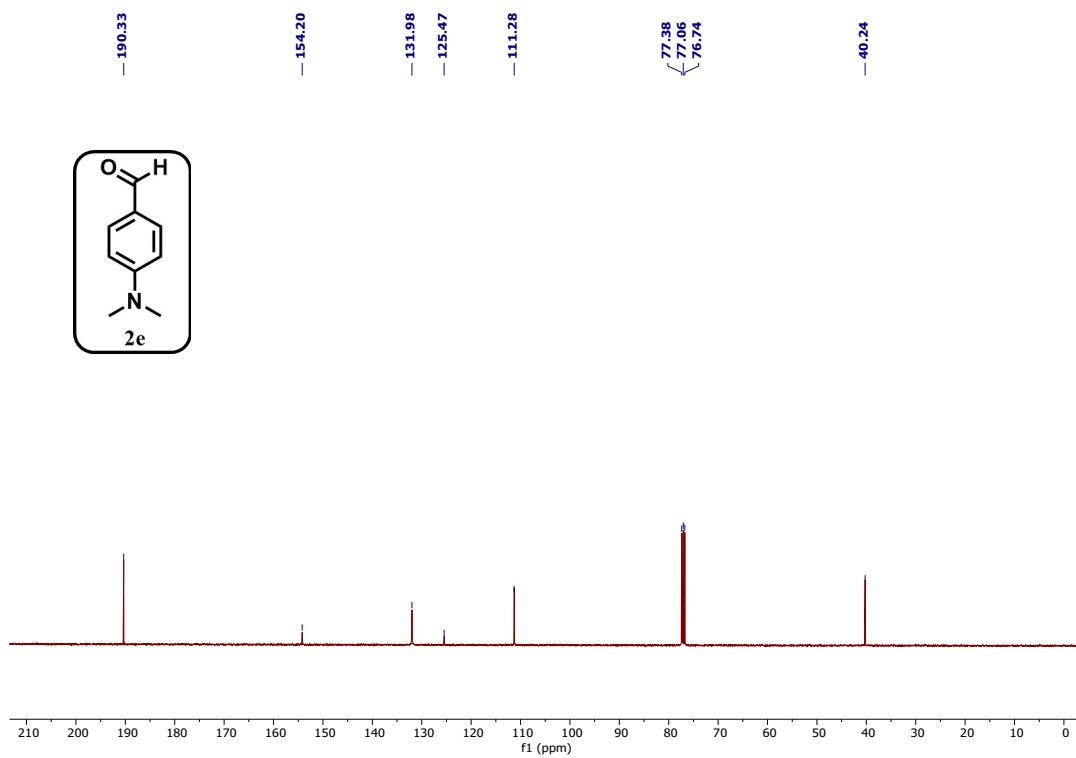

### <sup>1</sup>H NMR spectra of product 2f

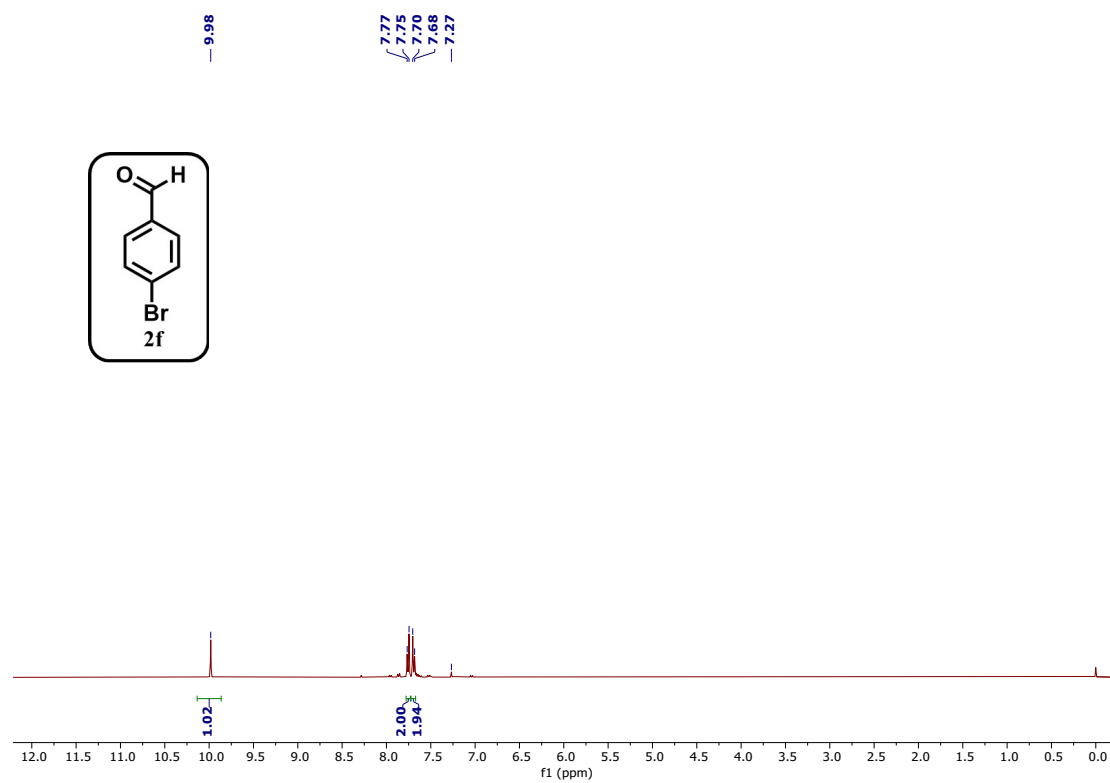

### <sup>13</sup>C NMR spectra of product 2f

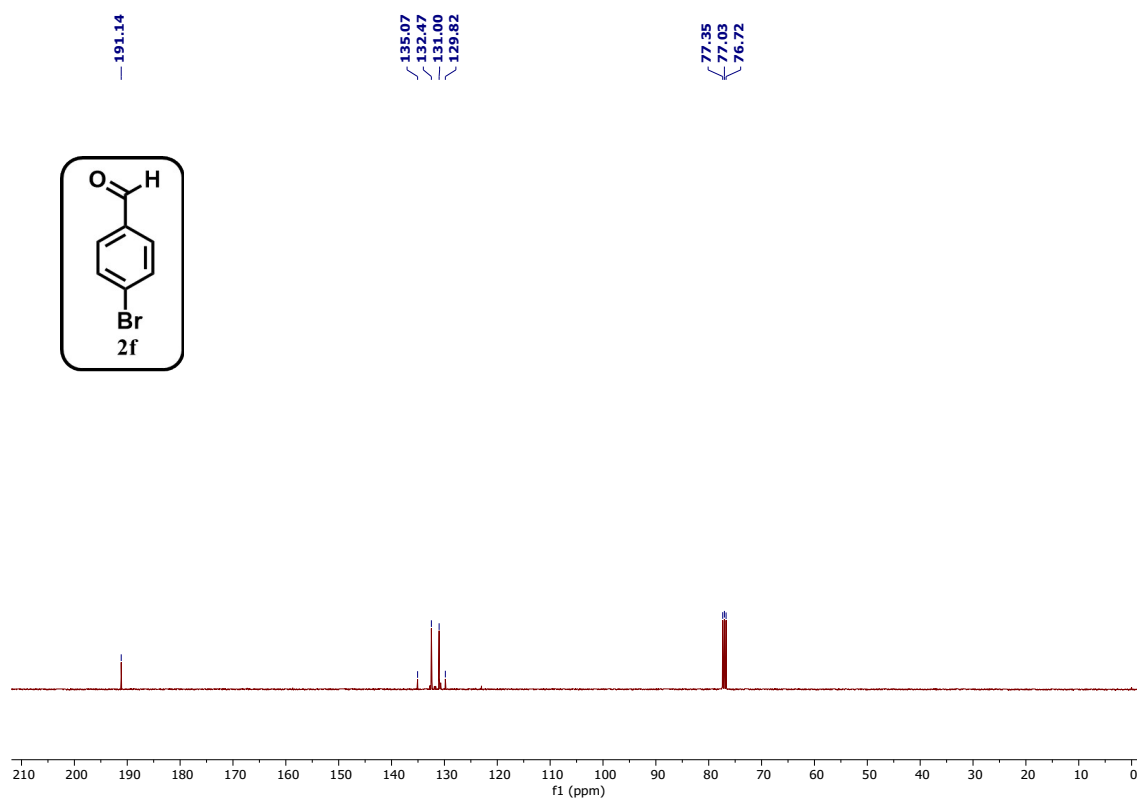

### <sup>1</sup>H NMR spectra of product 2g

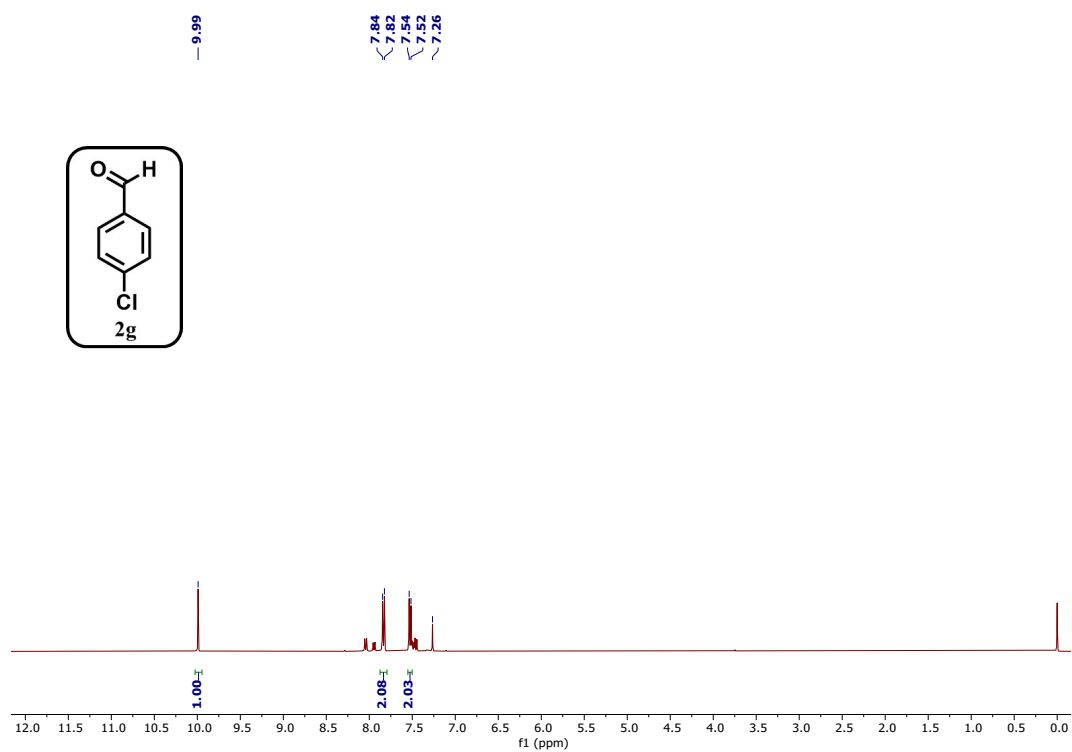

### <sup>13</sup>C NMR spectra of product 2g

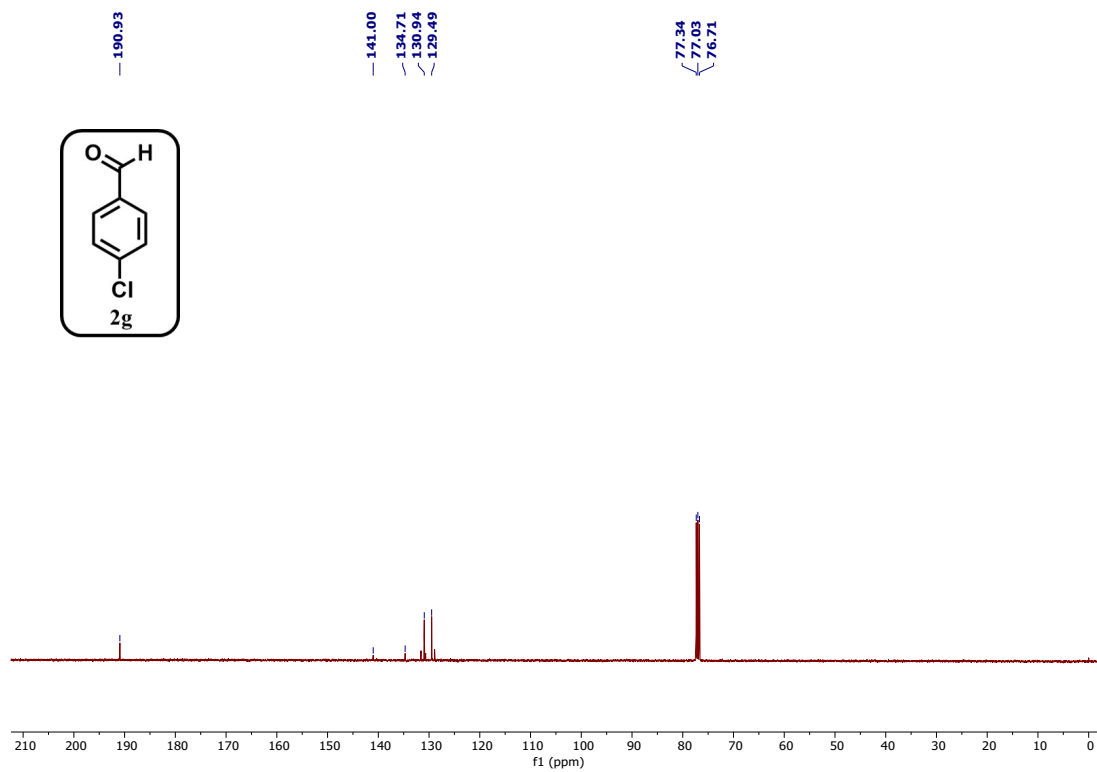

## <sup>1</sup>H NMR spectra of product 2h

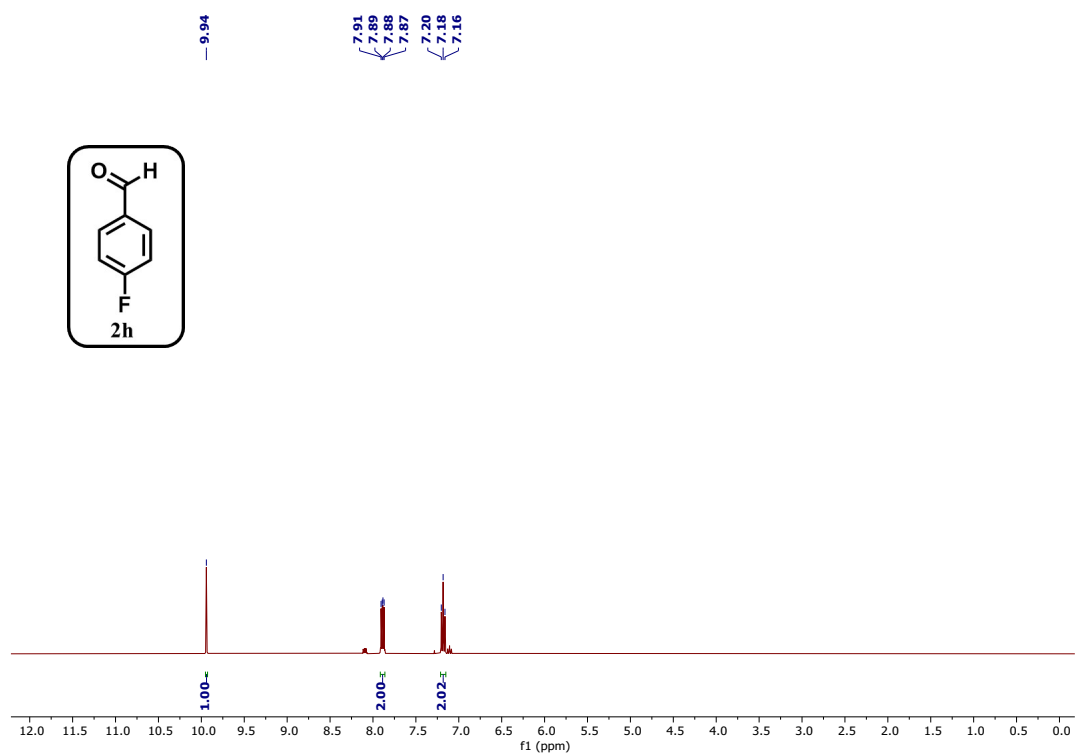

## <sup>13</sup>C NMR spectra of product 2h

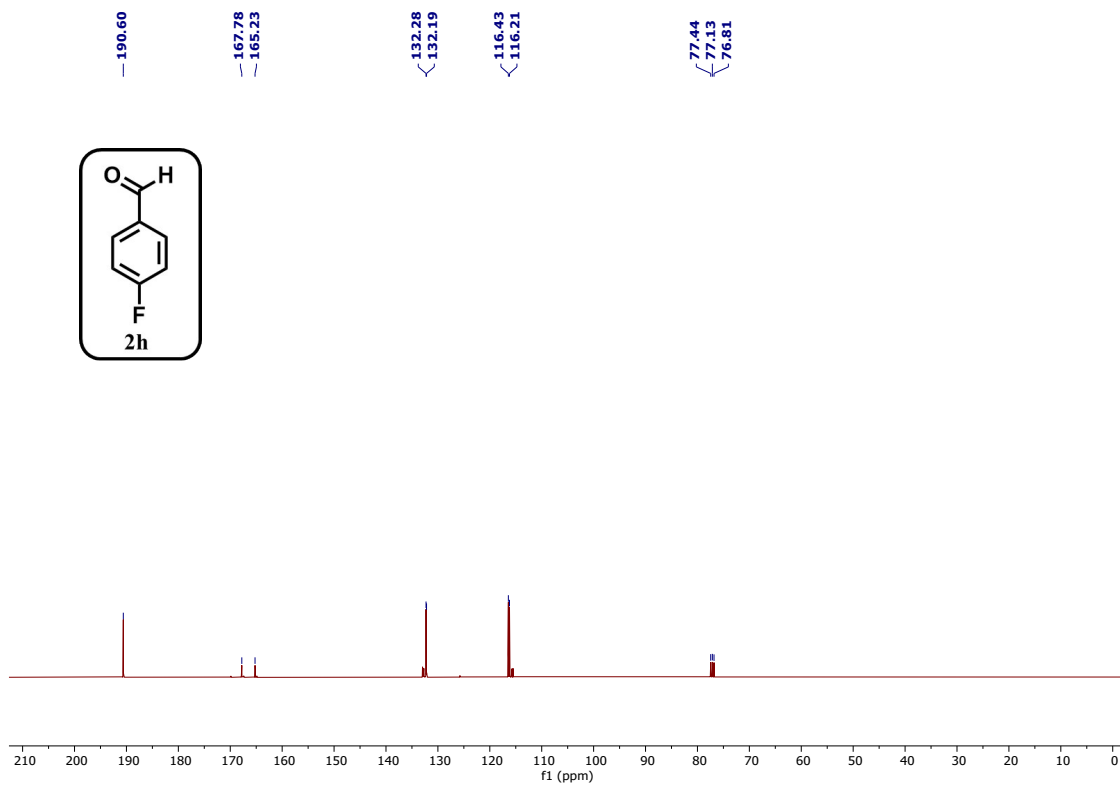

## <sup>1</sup>H NMR spectra of product 2i

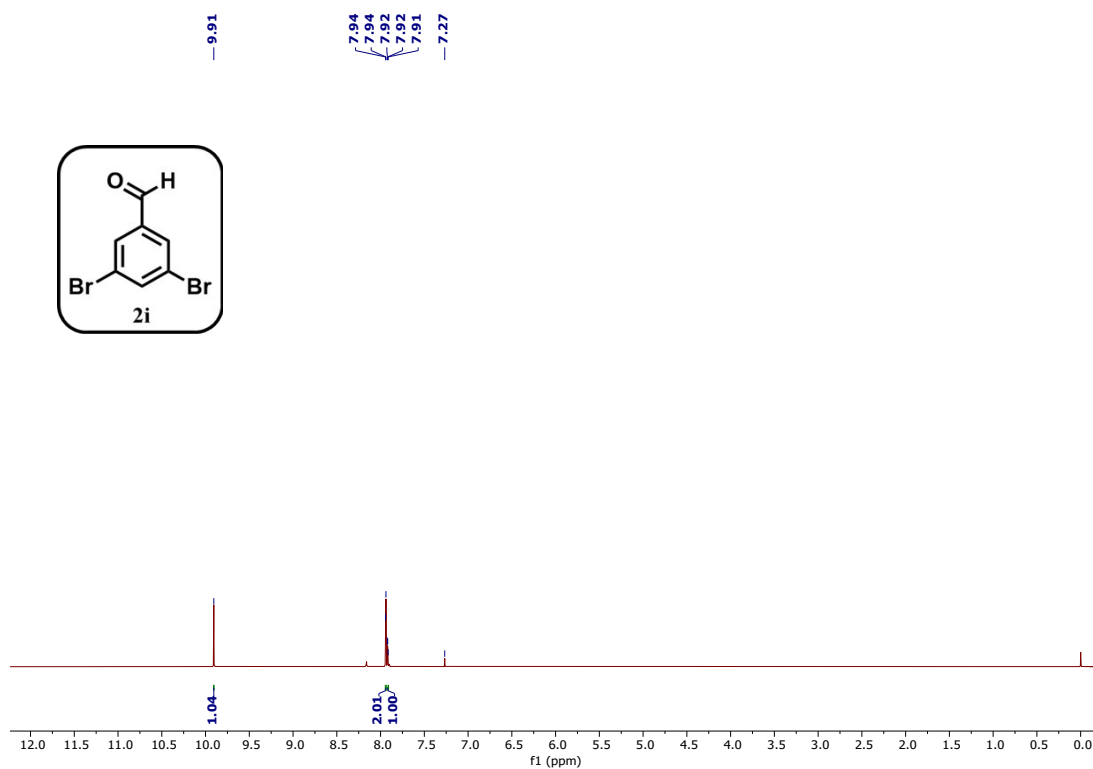

## <sup>13</sup>C NMR spectra of product 2i

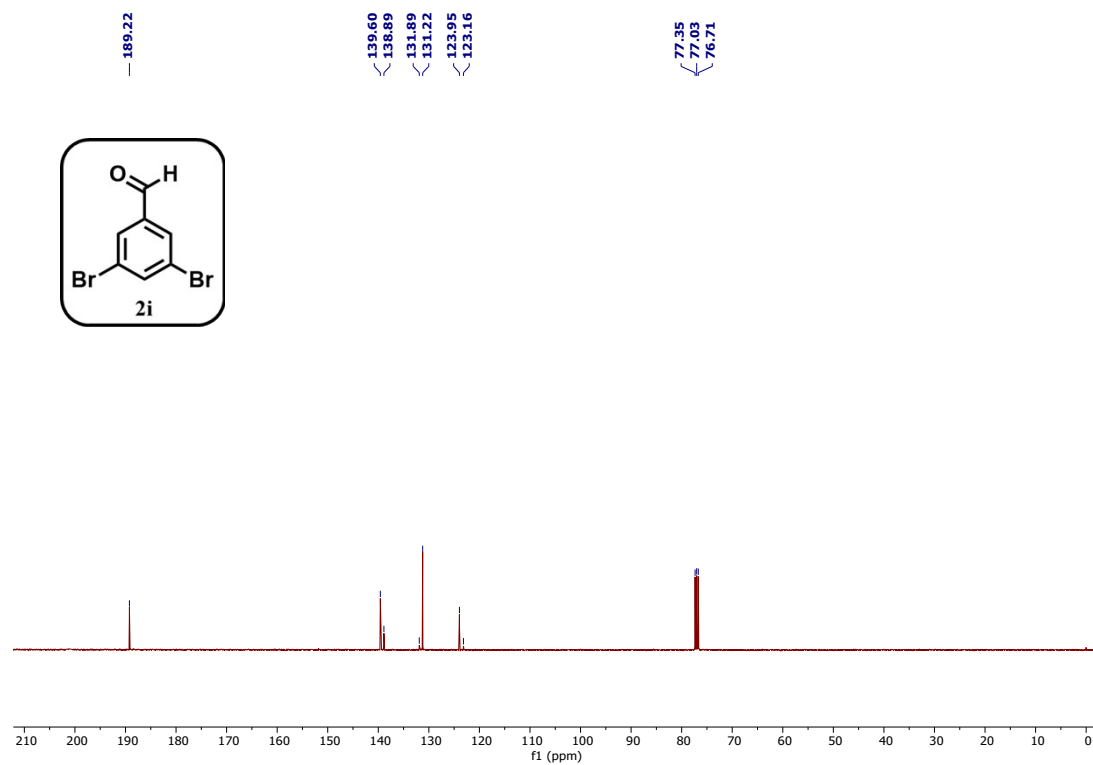

## <sup>1</sup>H NMR spectra of product 2j

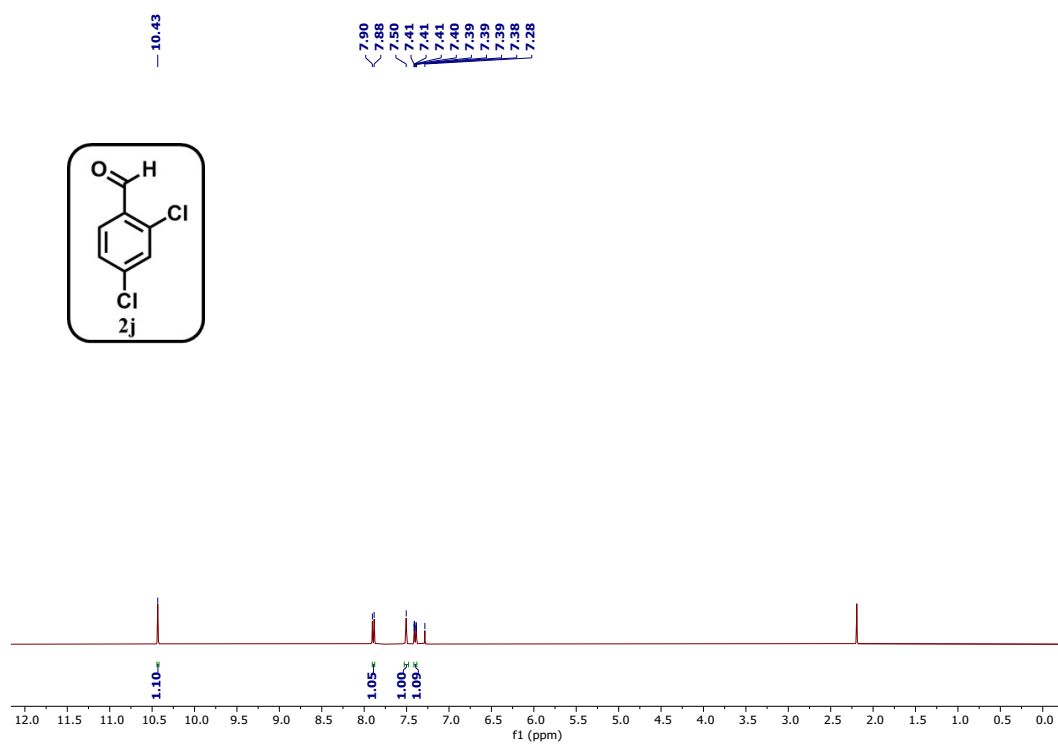

## <sup>13</sup>C NMR spectra of product 2j

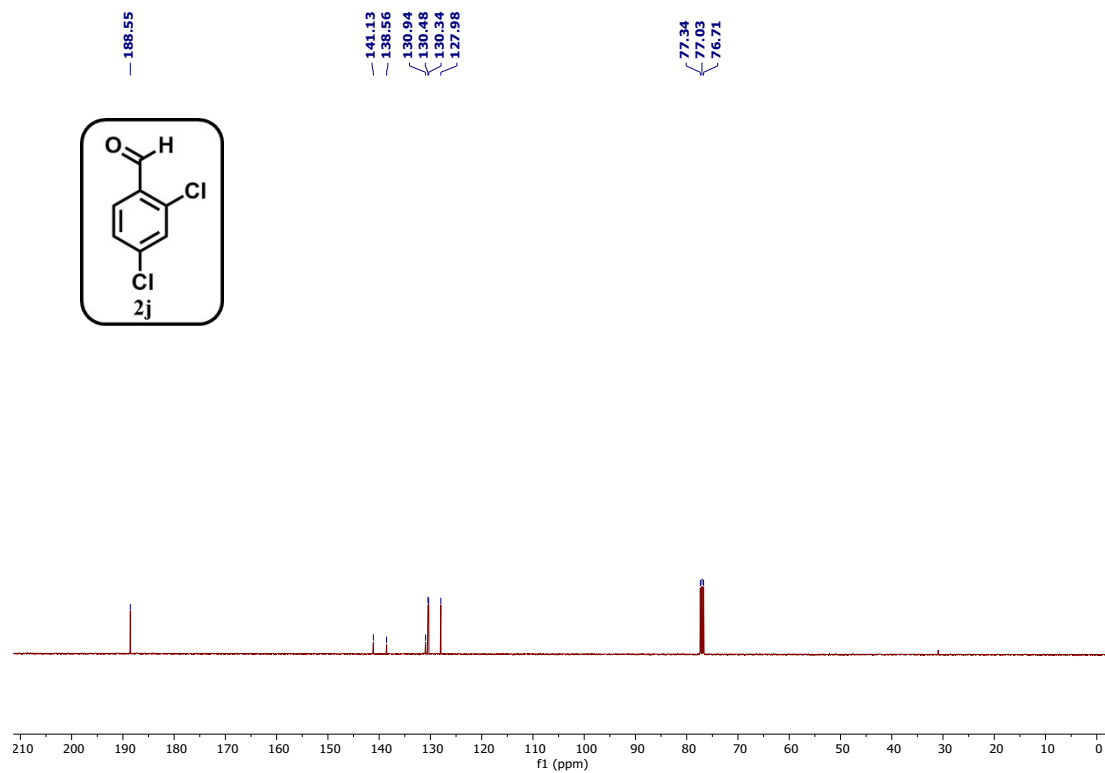

### <sup>1</sup>H NMR spectra of product 2k

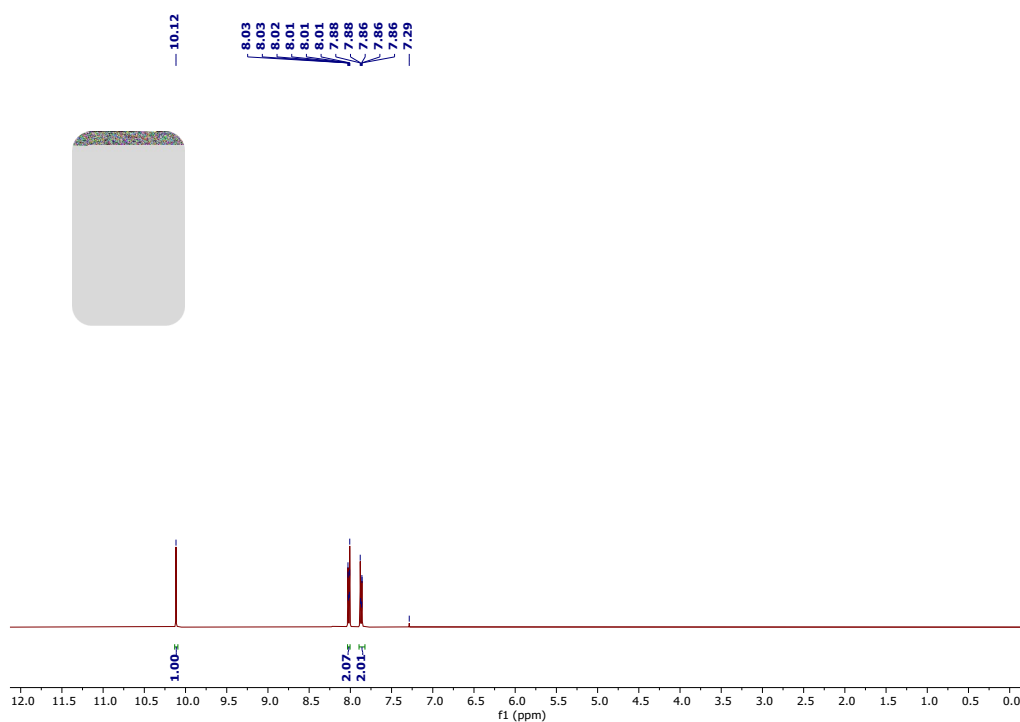

### <sup>13</sup>C NMR spectra of product 2k

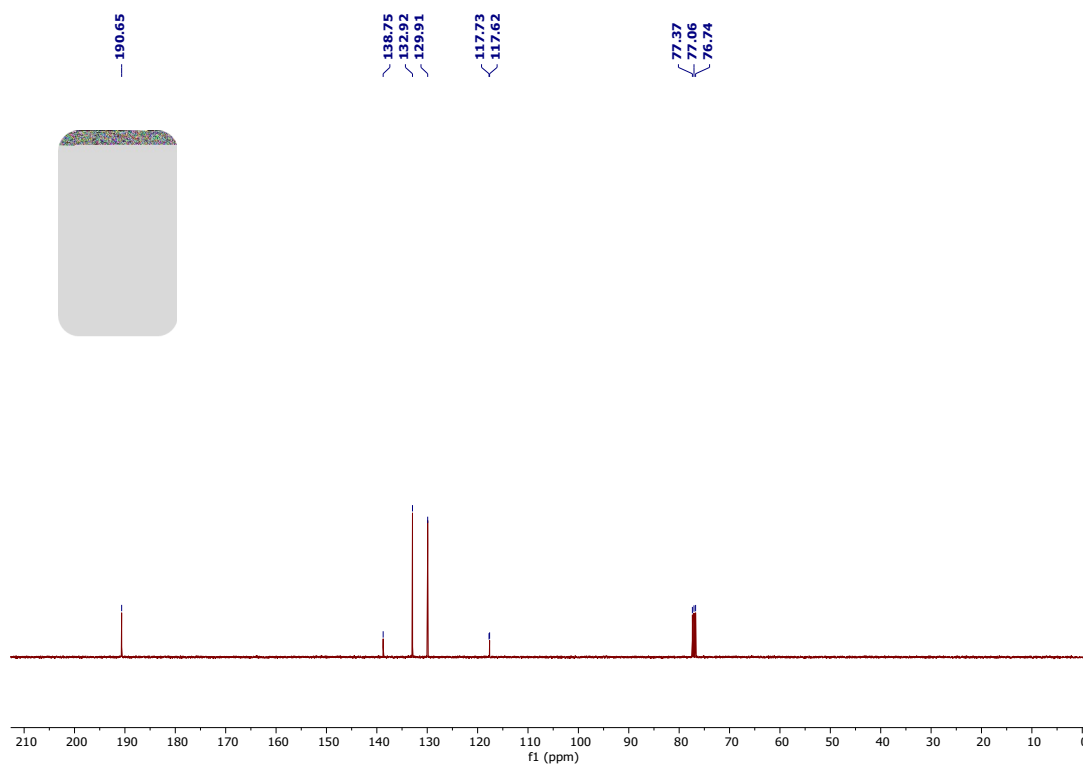

### <sup>1</sup>H NMR spectra of product 2l

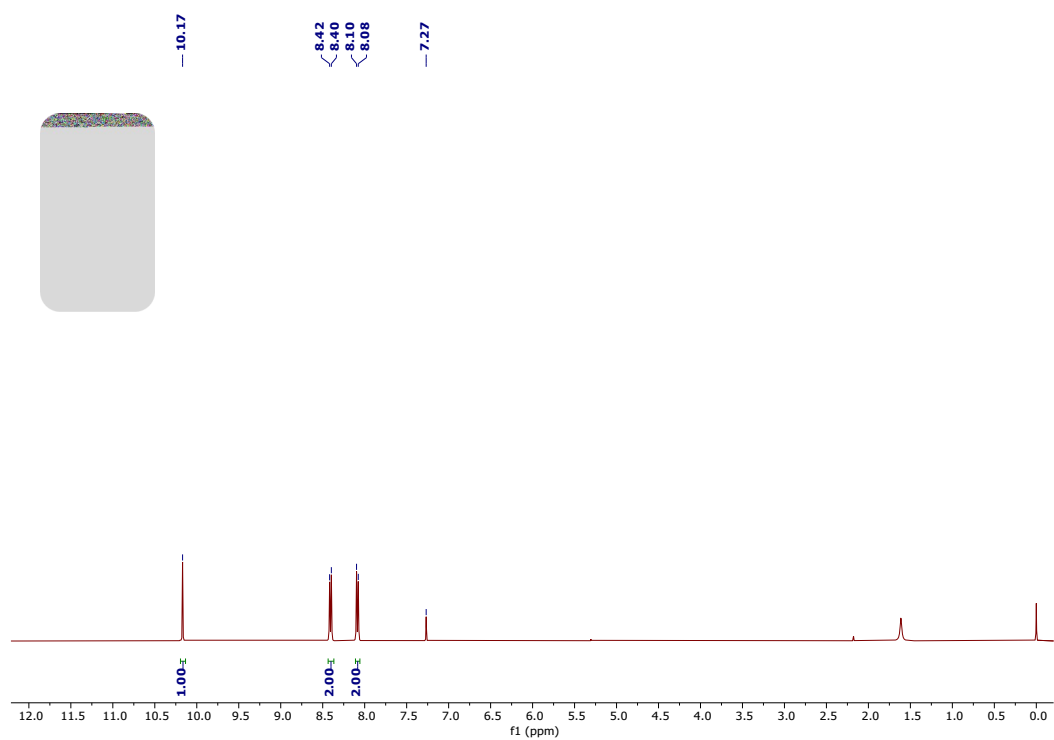

### <sup>13</sup>C NMR spectra of product 2l

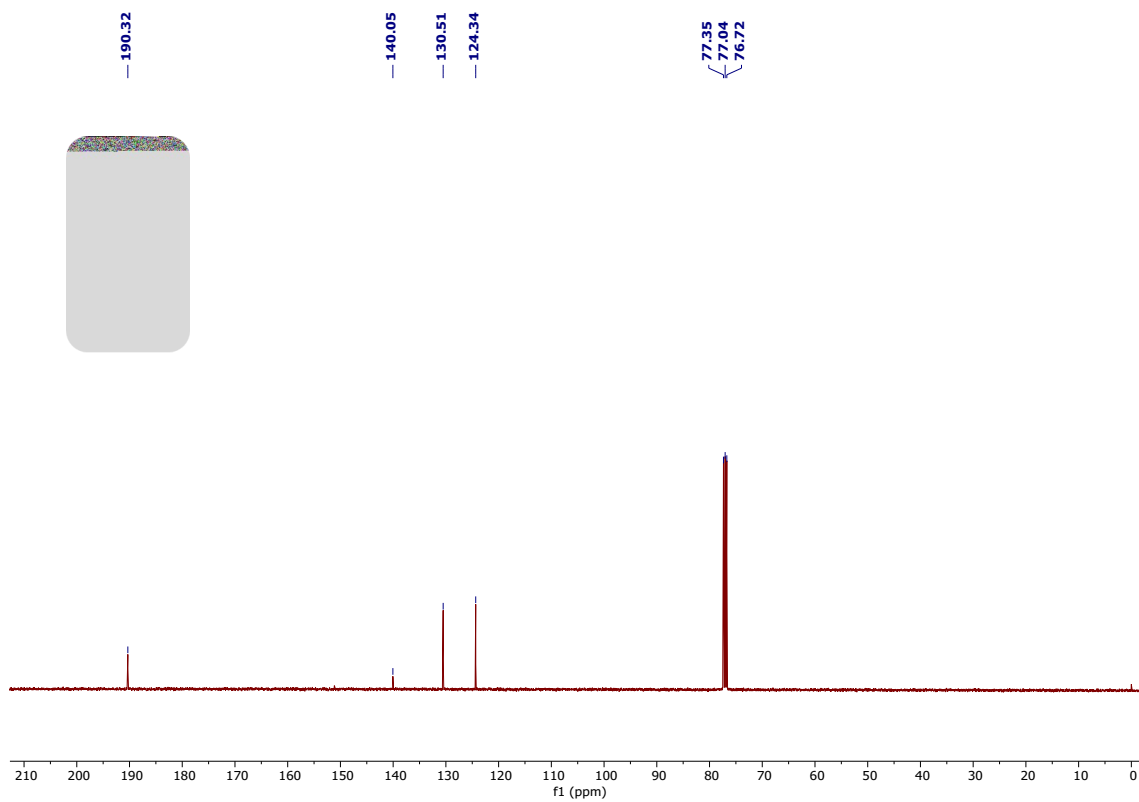

### <sup>1</sup>H NMR spectra of product 2m

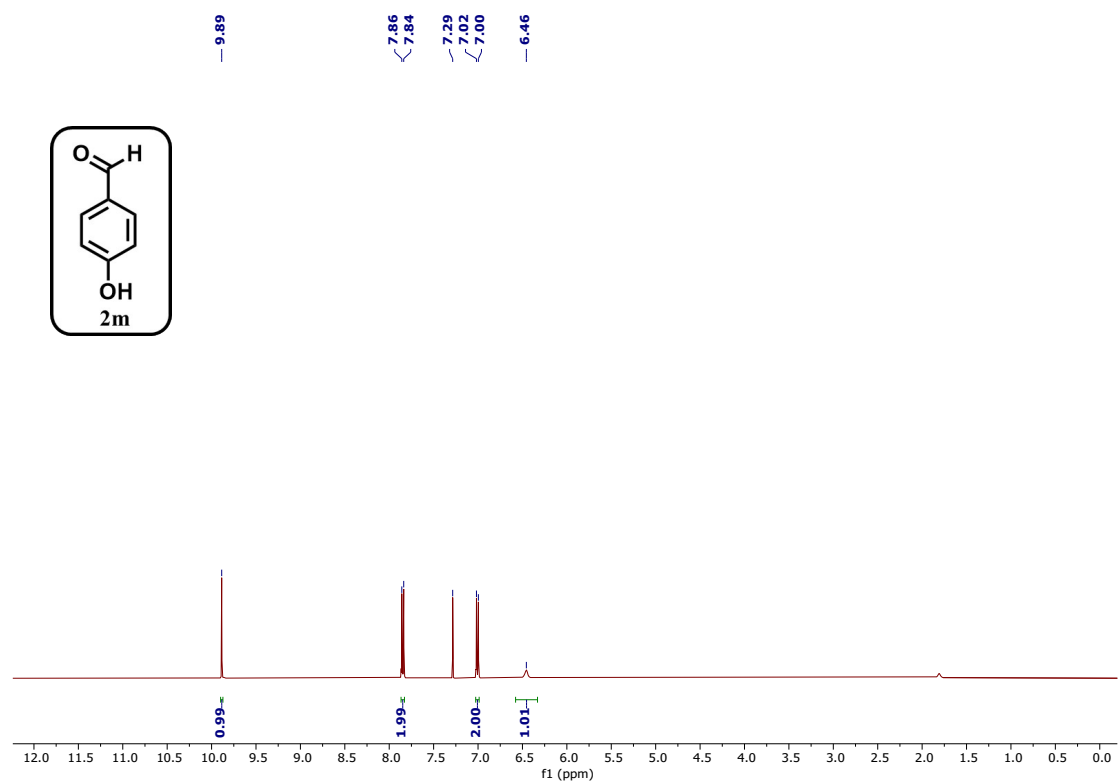

### <sup>13</sup>C NMR spectra of product 2m

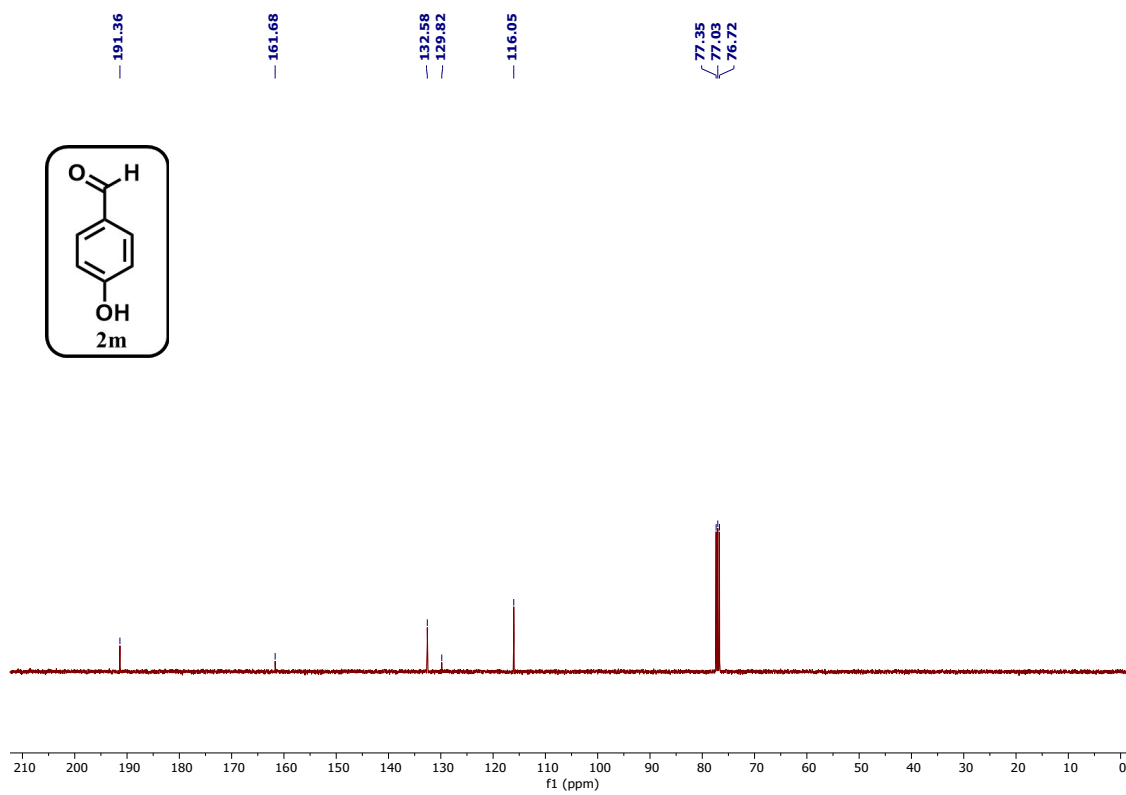

## <sup>1</sup>H NMR spectra of product 2n

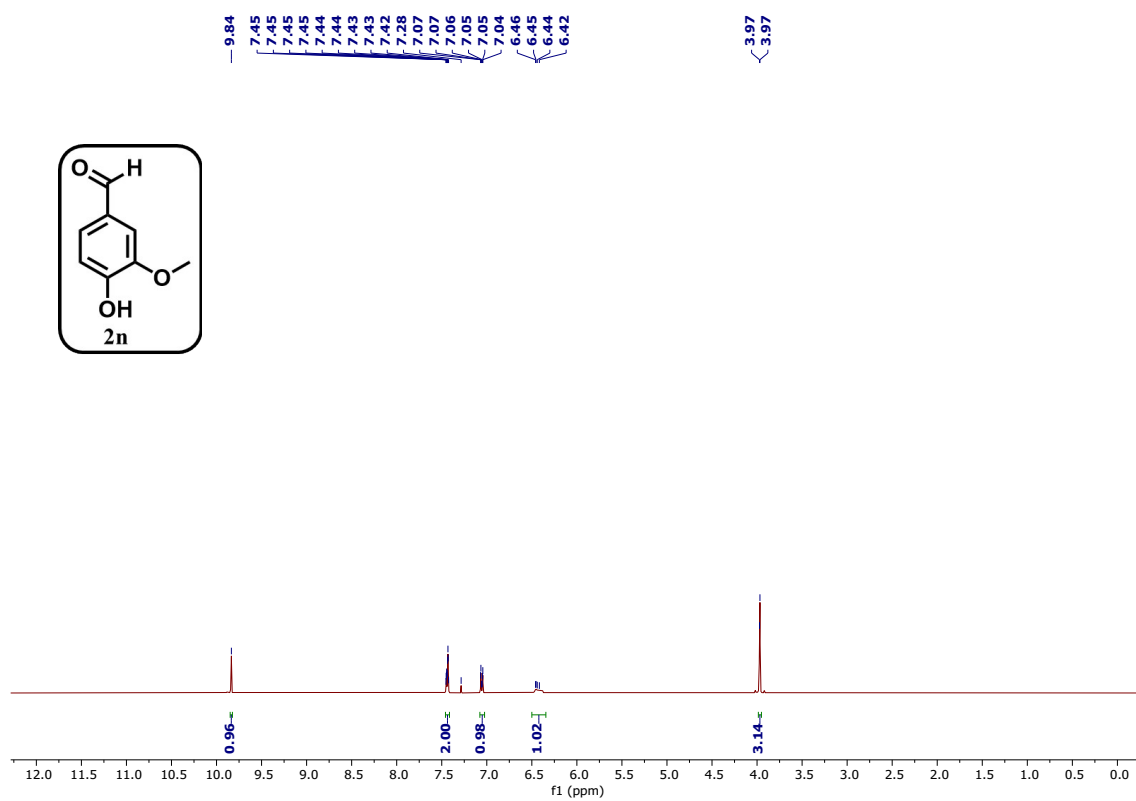

## <sup>13</sup>C NMR spectra of product 2n

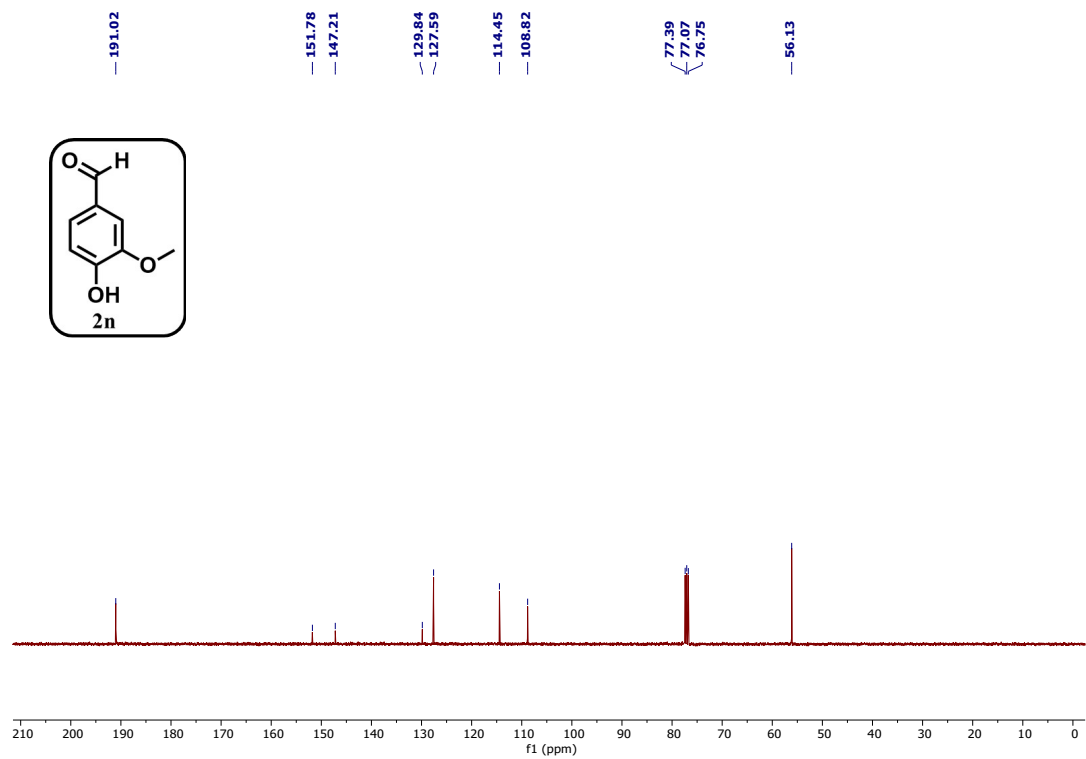

## <sup>1</sup>H NMR spectra of product 2o

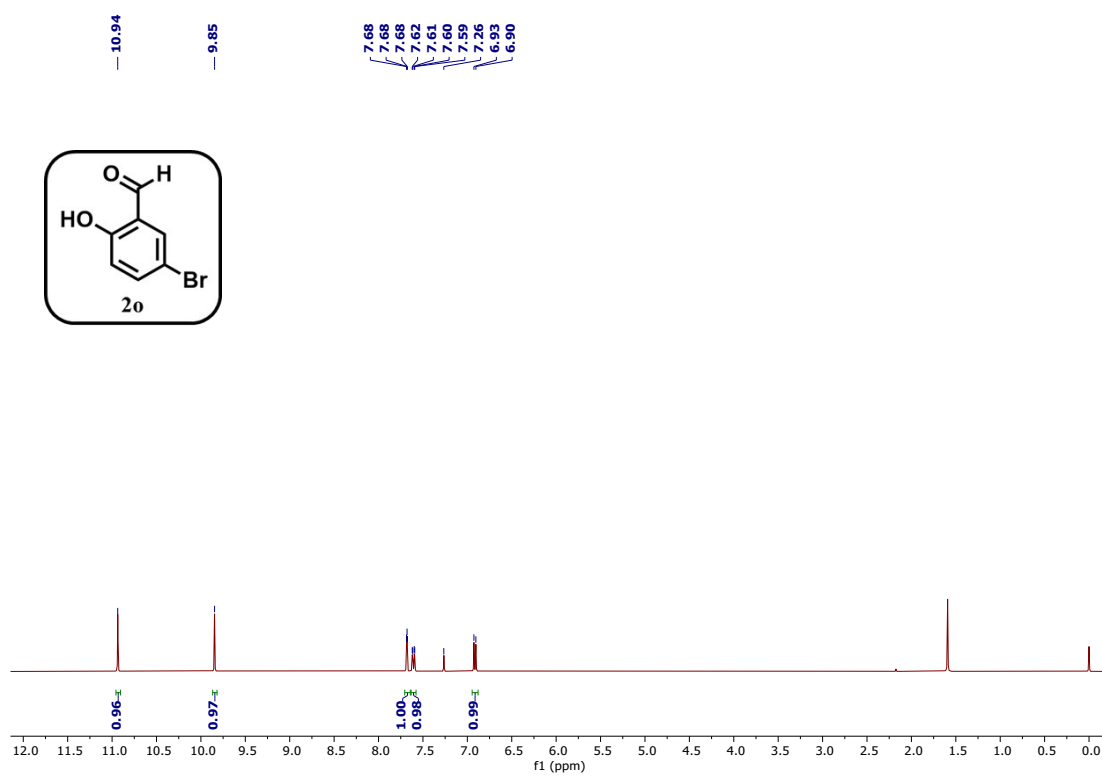

## <sup>13</sup>C NMR spectra of product 2o

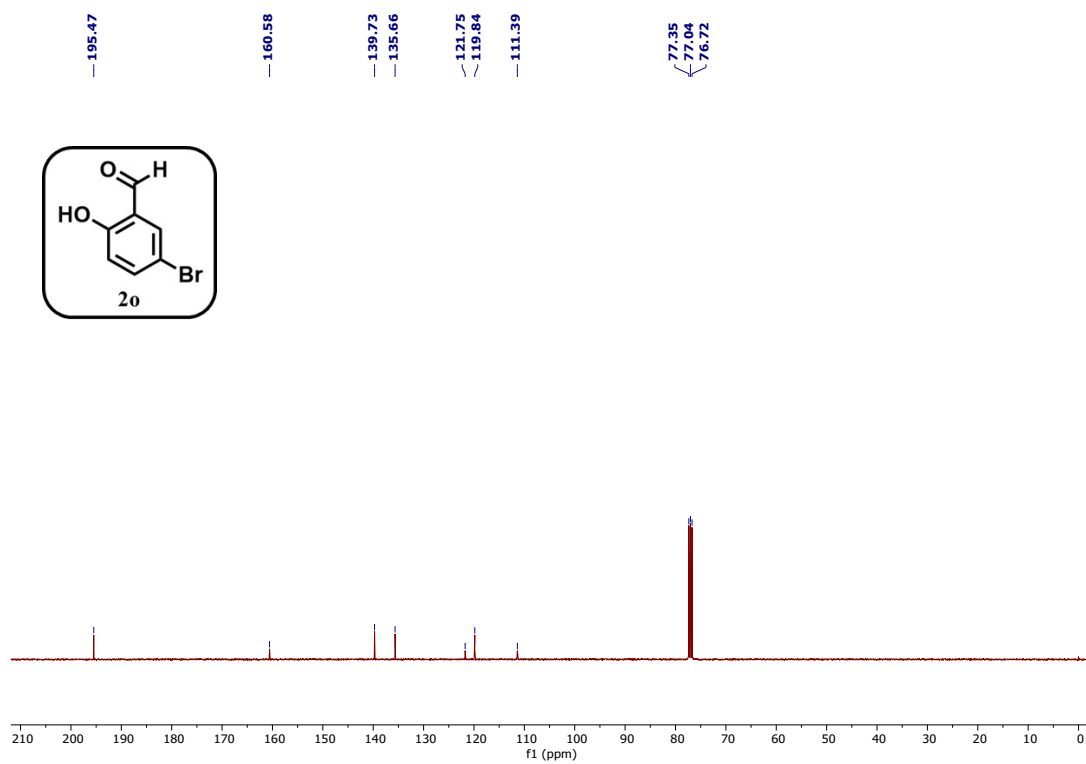

### <sup>1</sup>H NMR spectra of product 2p

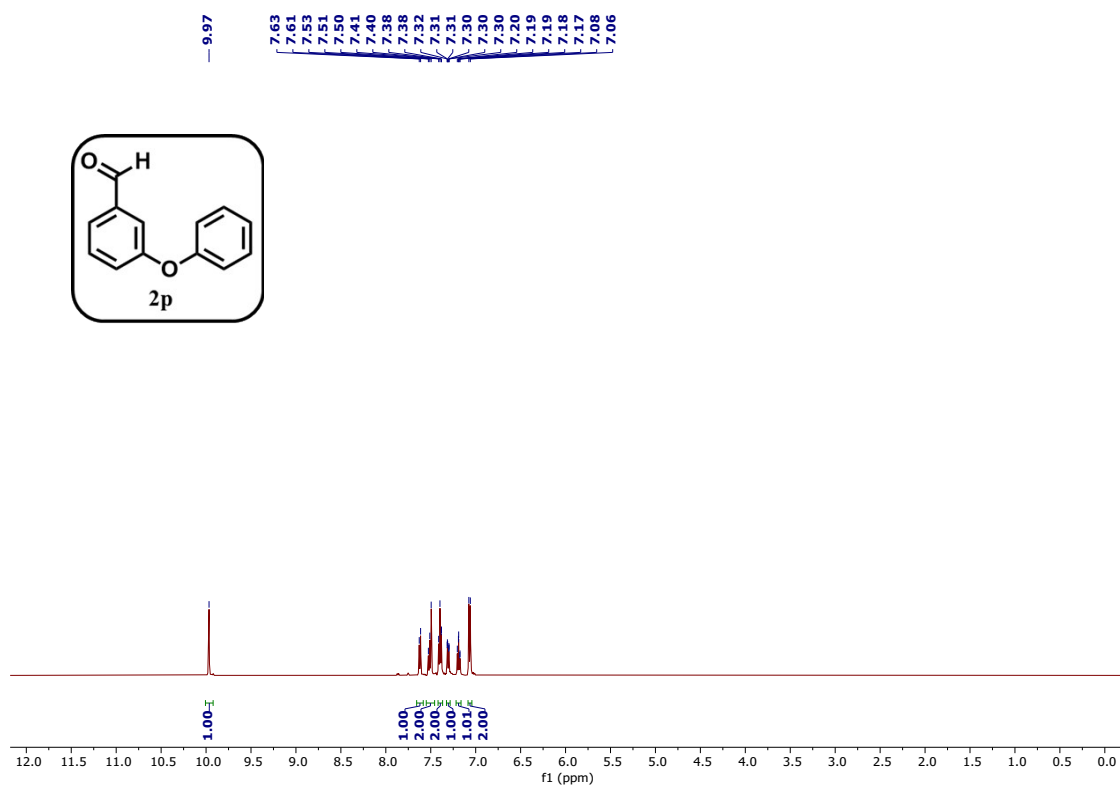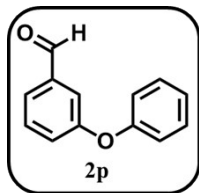

### <sup>13</sup>C NMR spectra of product 2p

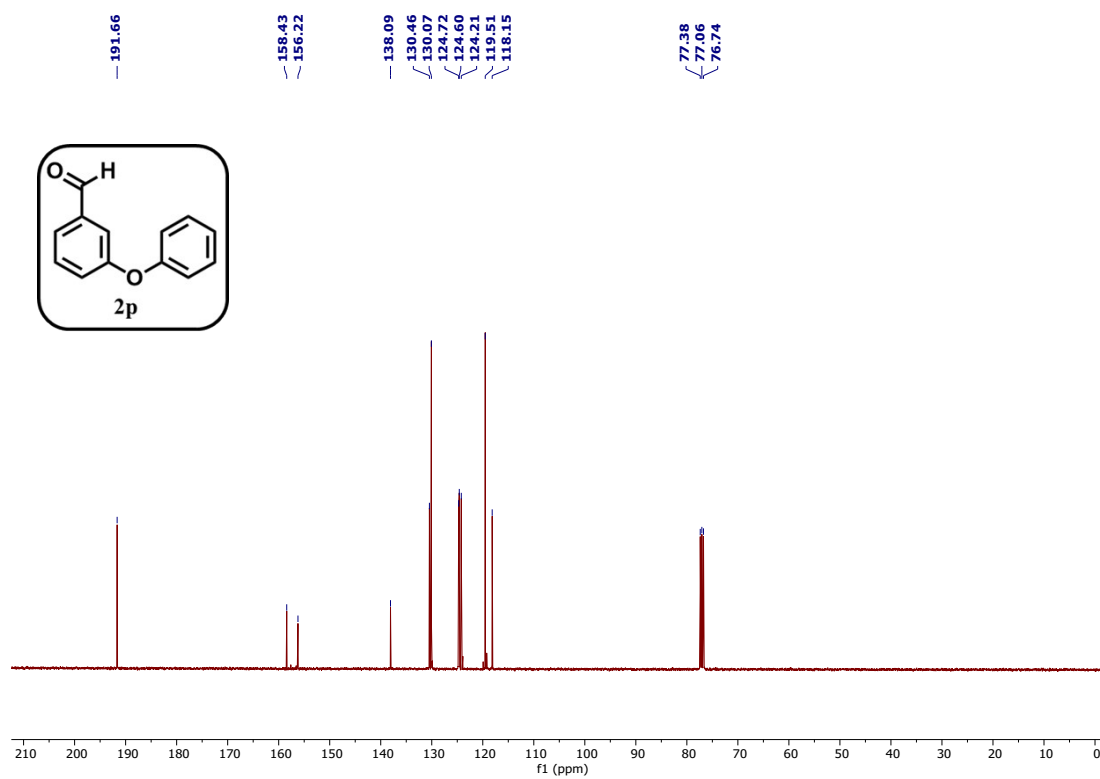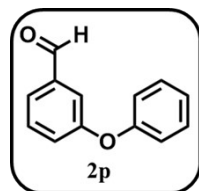

## <sup>1</sup>H NMR spectra of product 2q

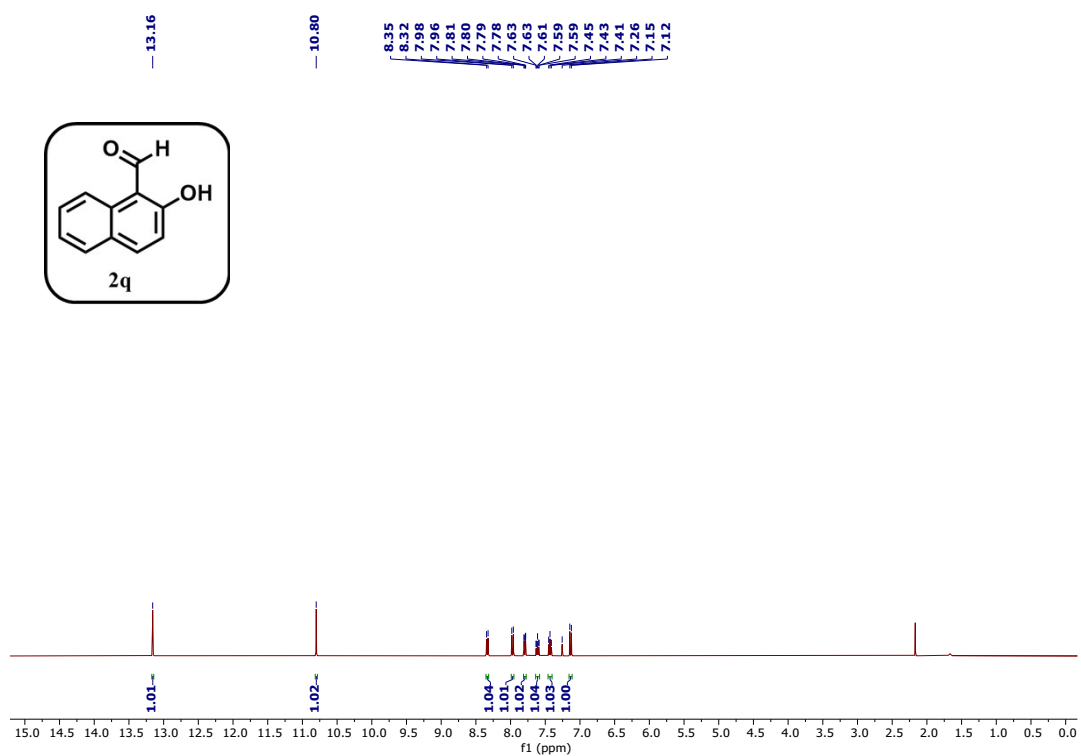

## <sup>13</sup>C NMR spectra of product 2q

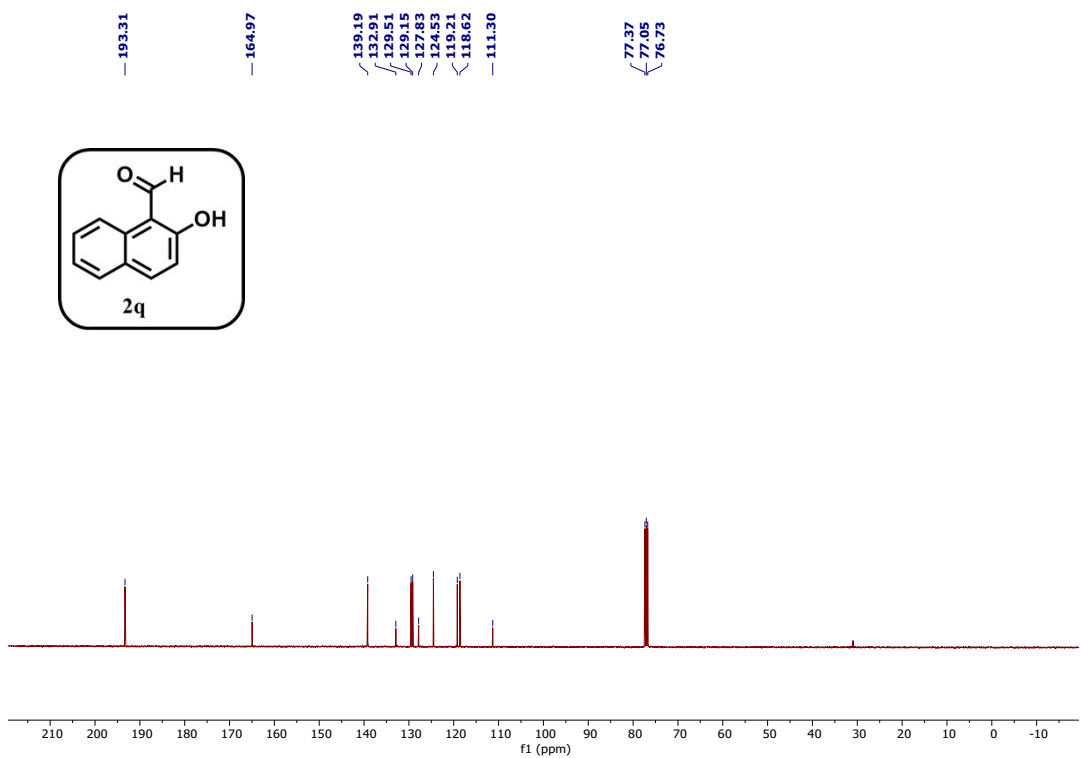

## <sup>1</sup>H NMR spectra of product 2r

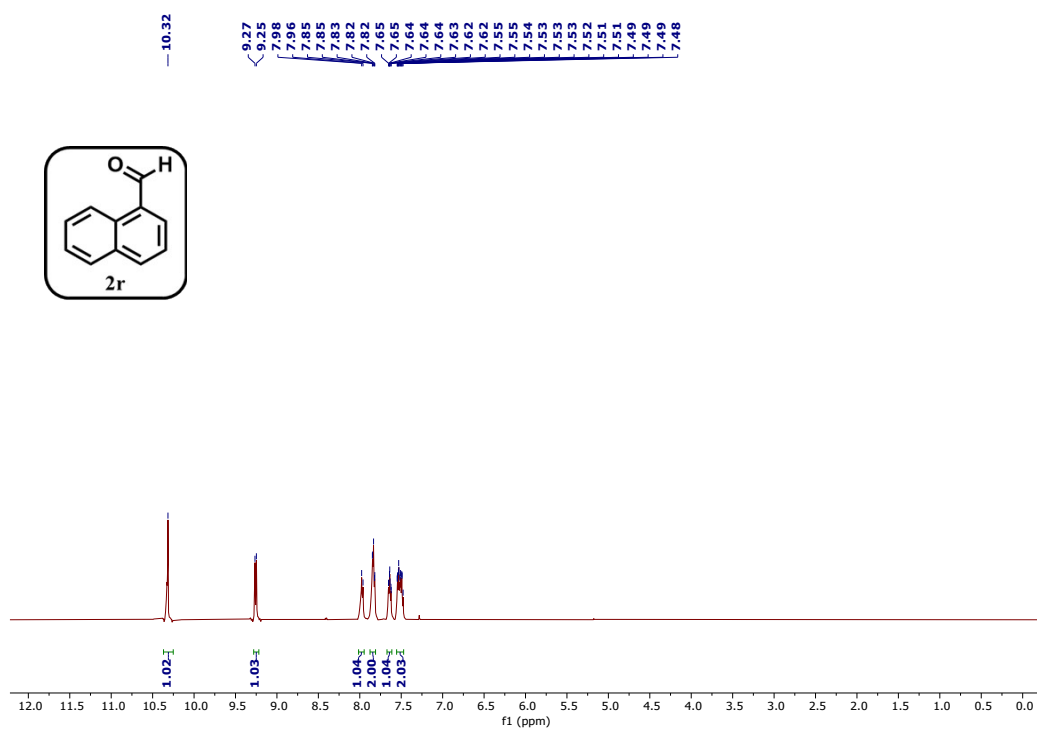

## <sup>13</sup>C NMR spectra of product 2r

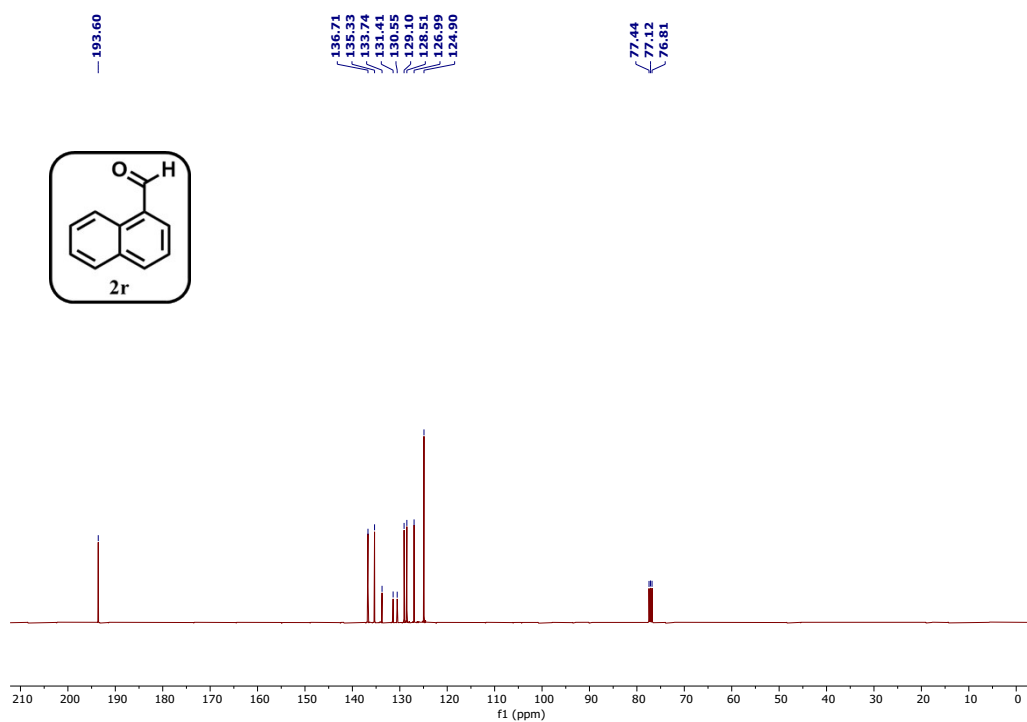

## <sup>1</sup>H NMR spectra of product 2s

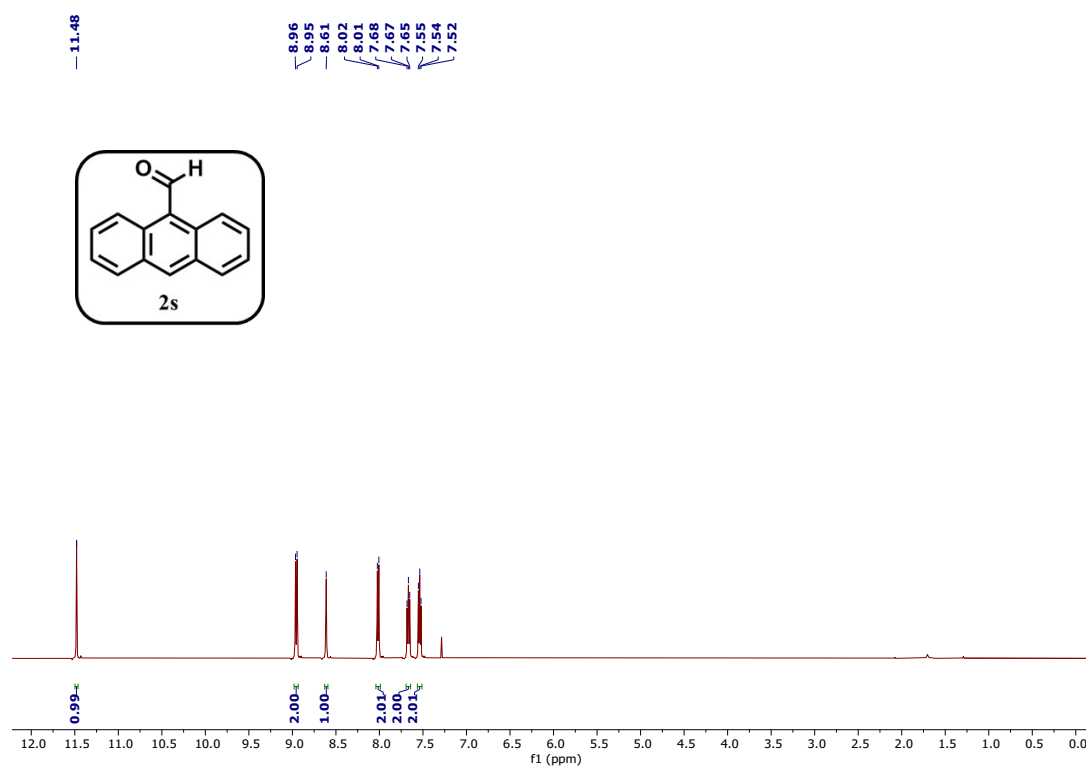

## <sup>13</sup>C NMR spectra of product 2s

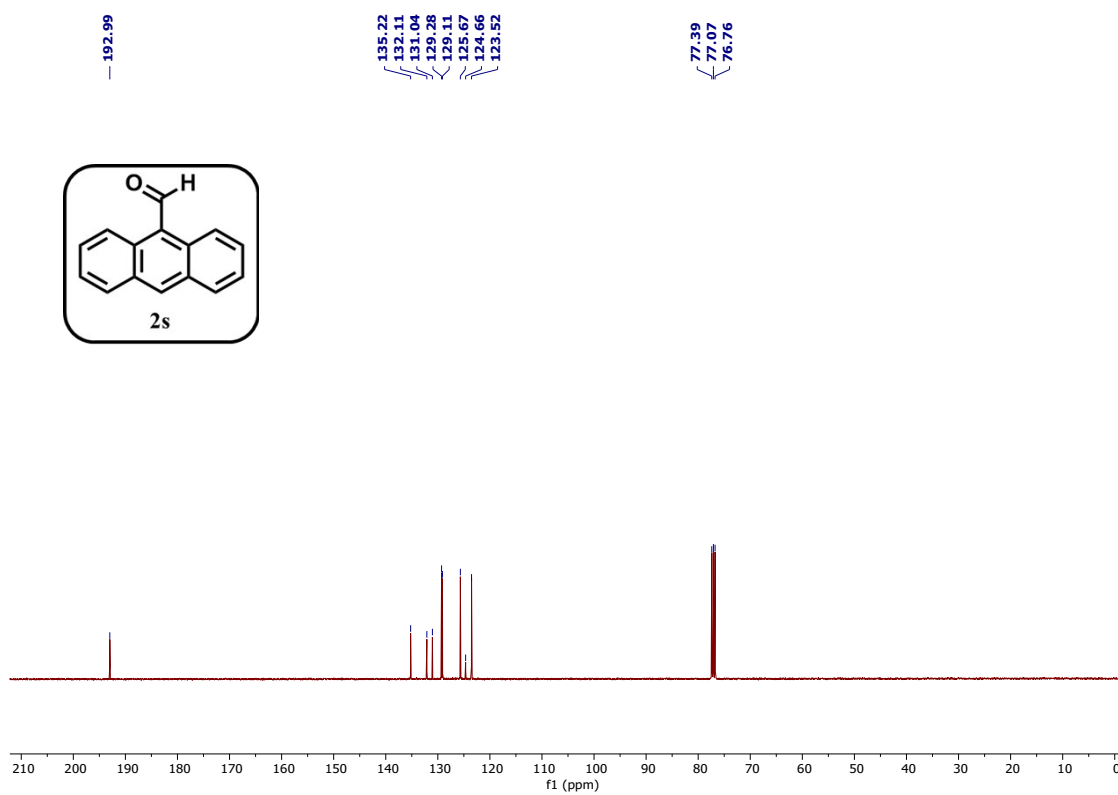

### <sup>1</sup>H NMR spectra of product 2t

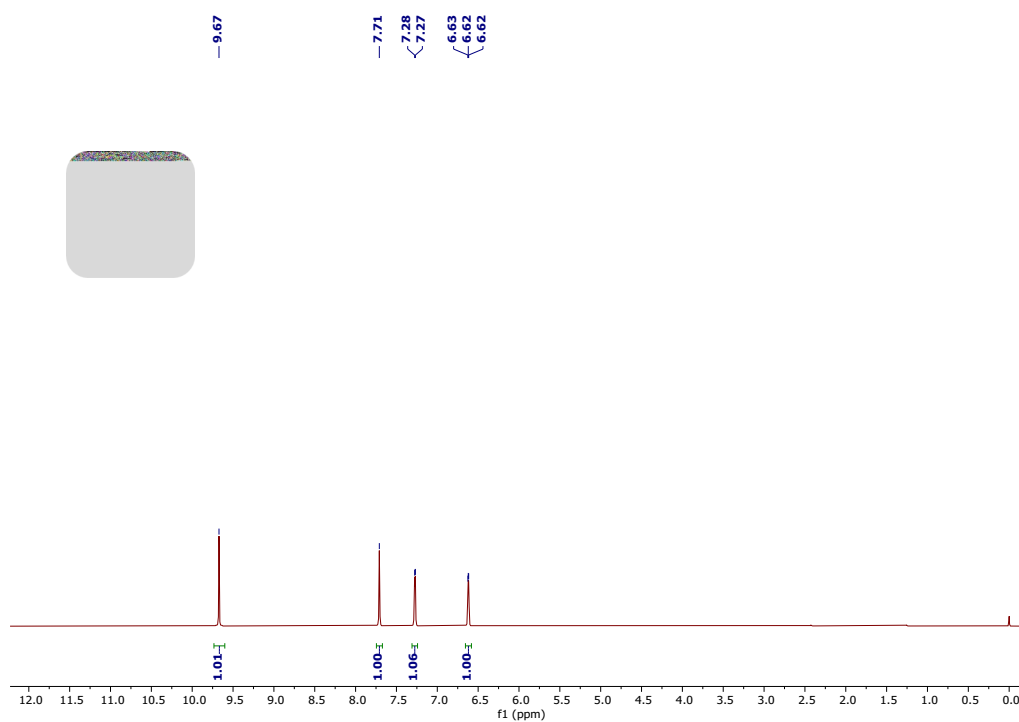

### <sup>13</sup>C NMR spectra of product 2t

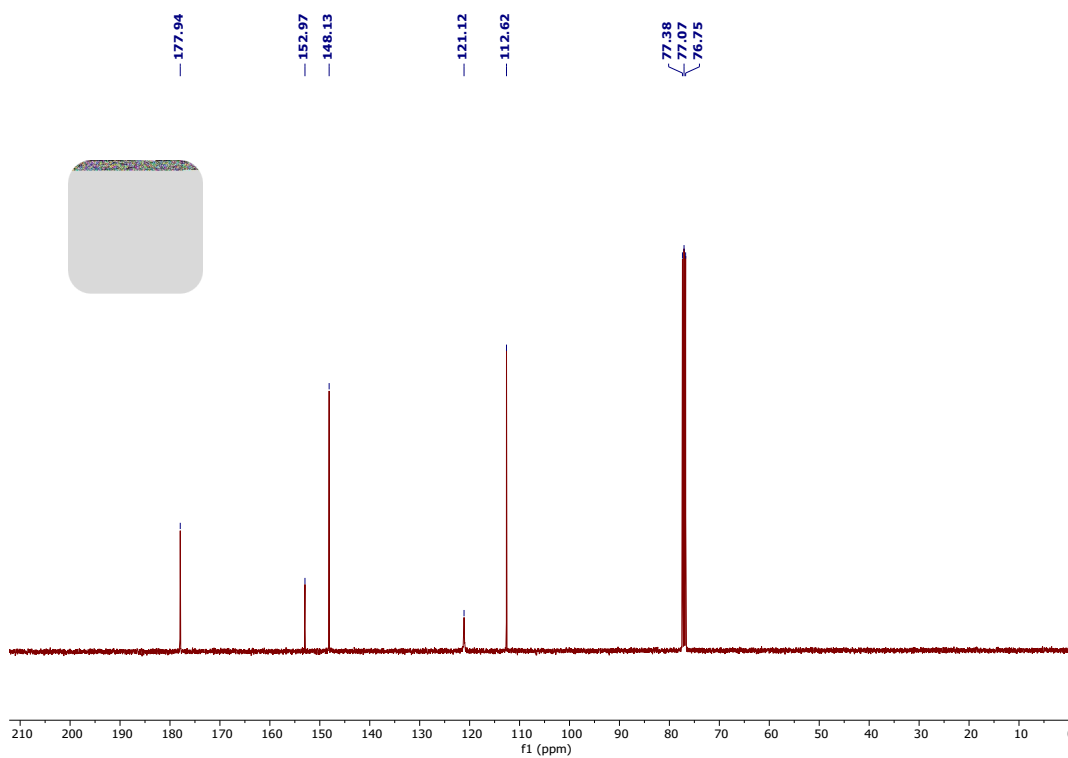

## <sup>1</sup>H NMR spectra of product 2u

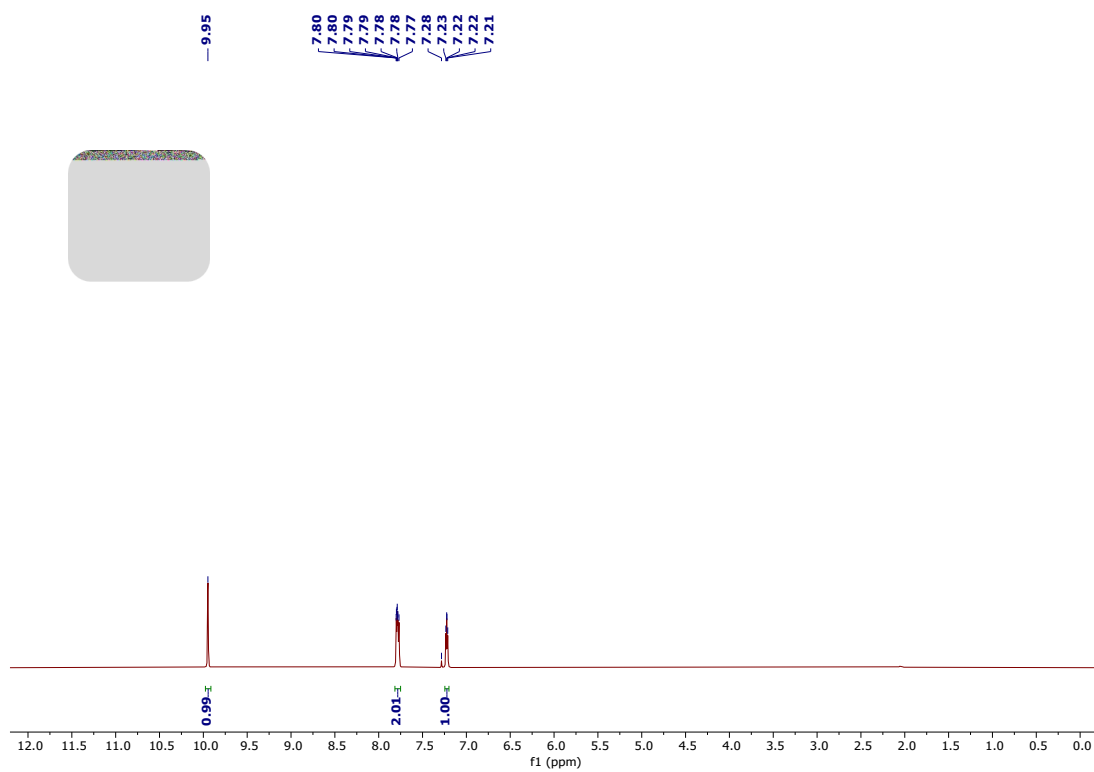

## <sup>13</sup>C NMR spectra of product 2u

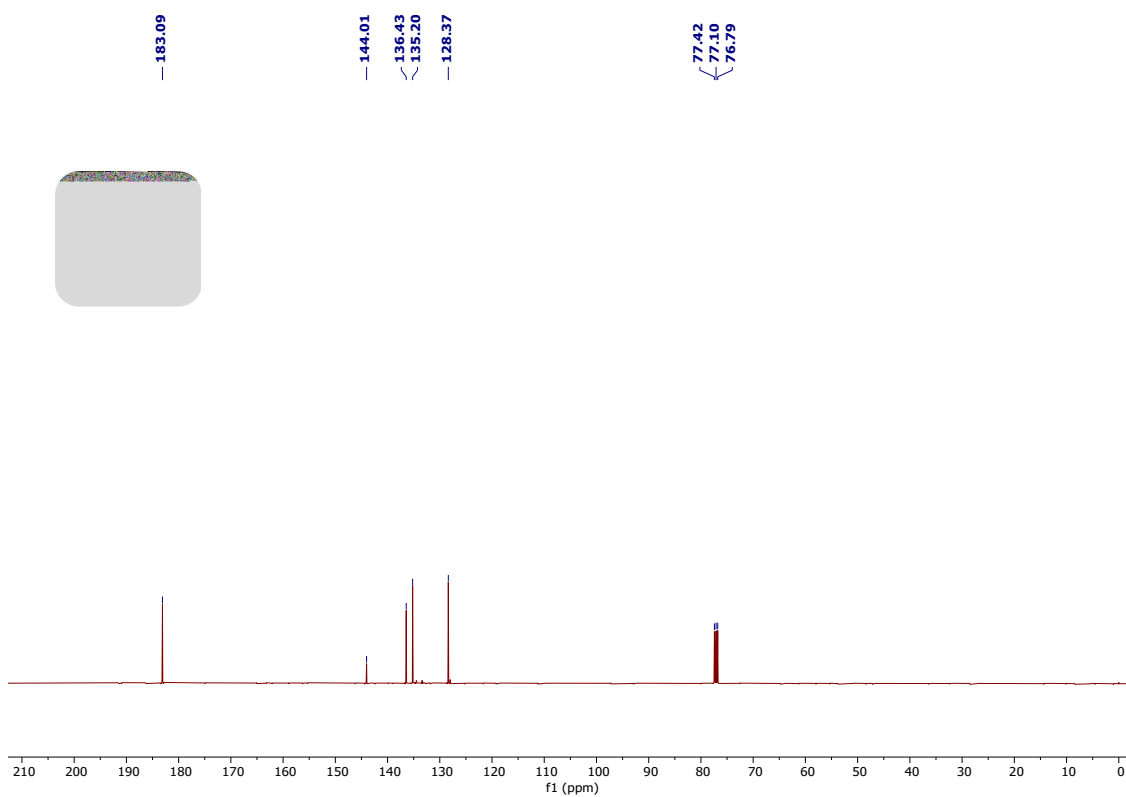

### <sup>1</sup>H NMR spectra of product 2v

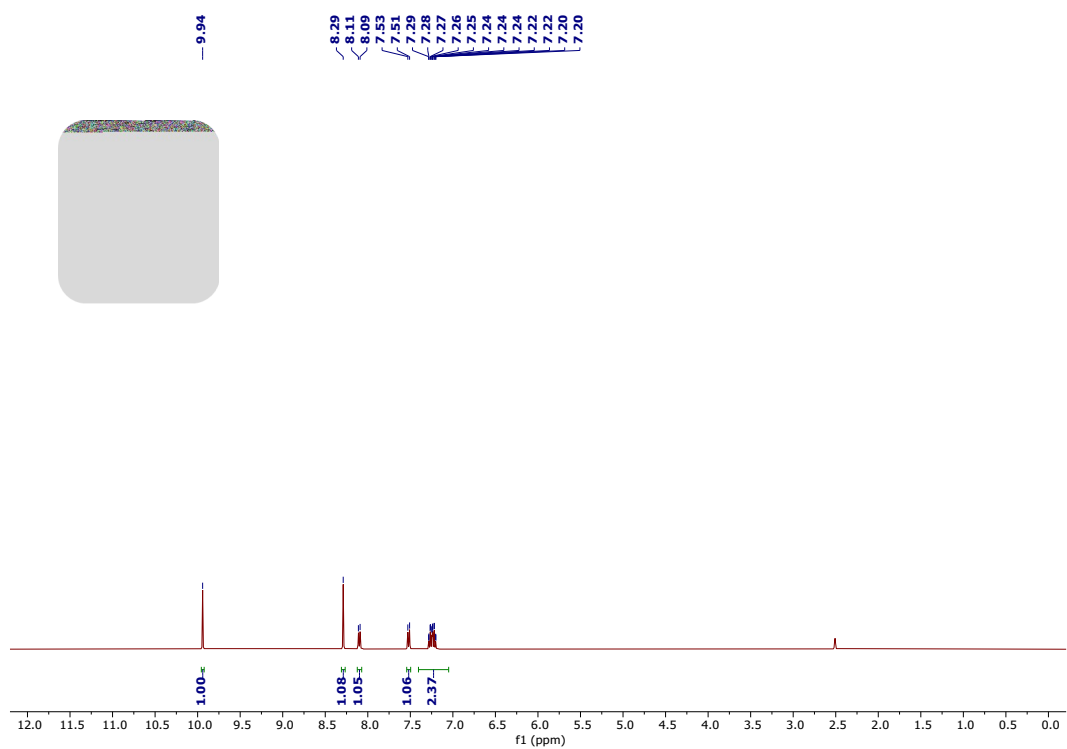

### <sup>13</sup>C NMR spectra of product 2v

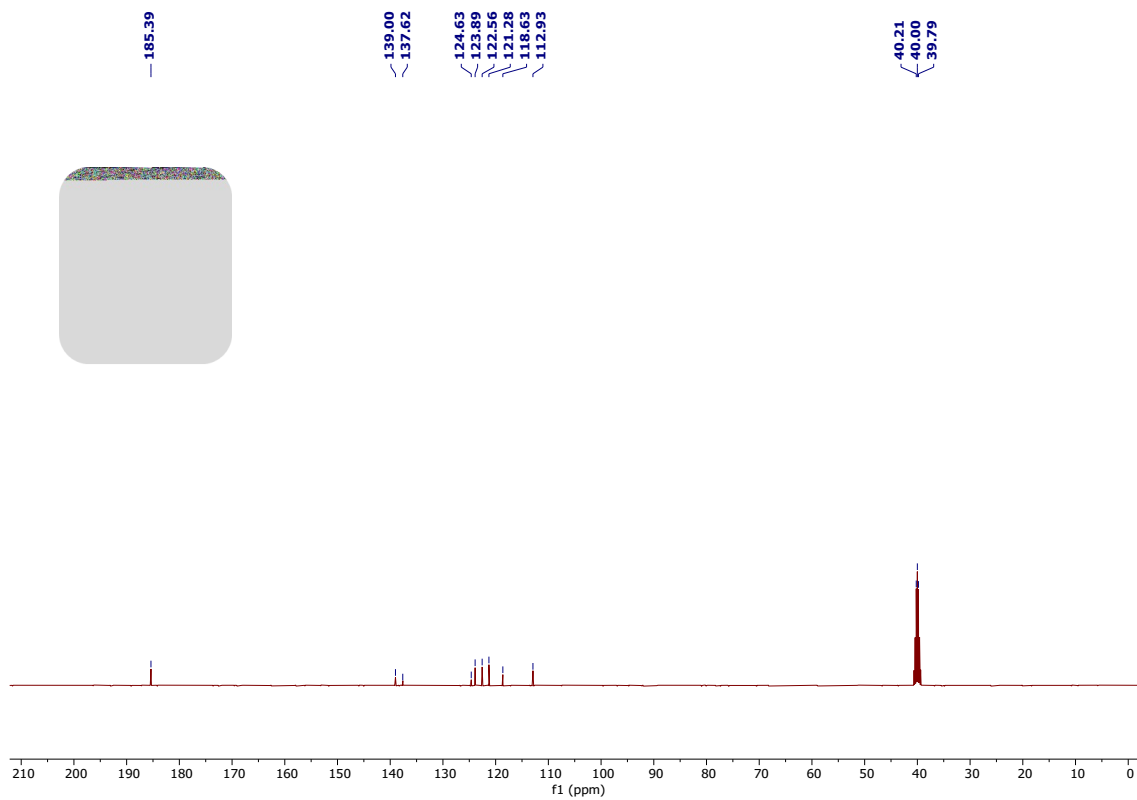

## <sup>1</sup>H NMR spectra of 4-methoxy benzoic acid

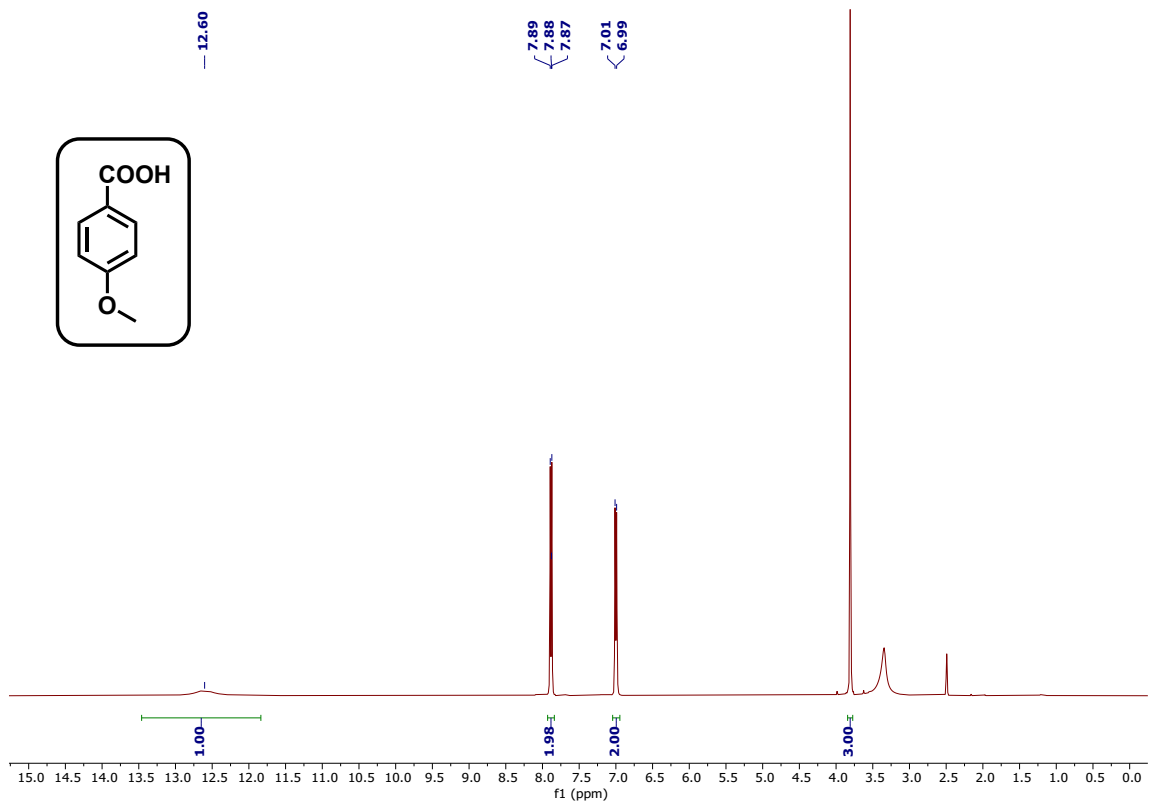

## <sup>13</sup>C NMR spectra of 4-methoxy benzoic acid

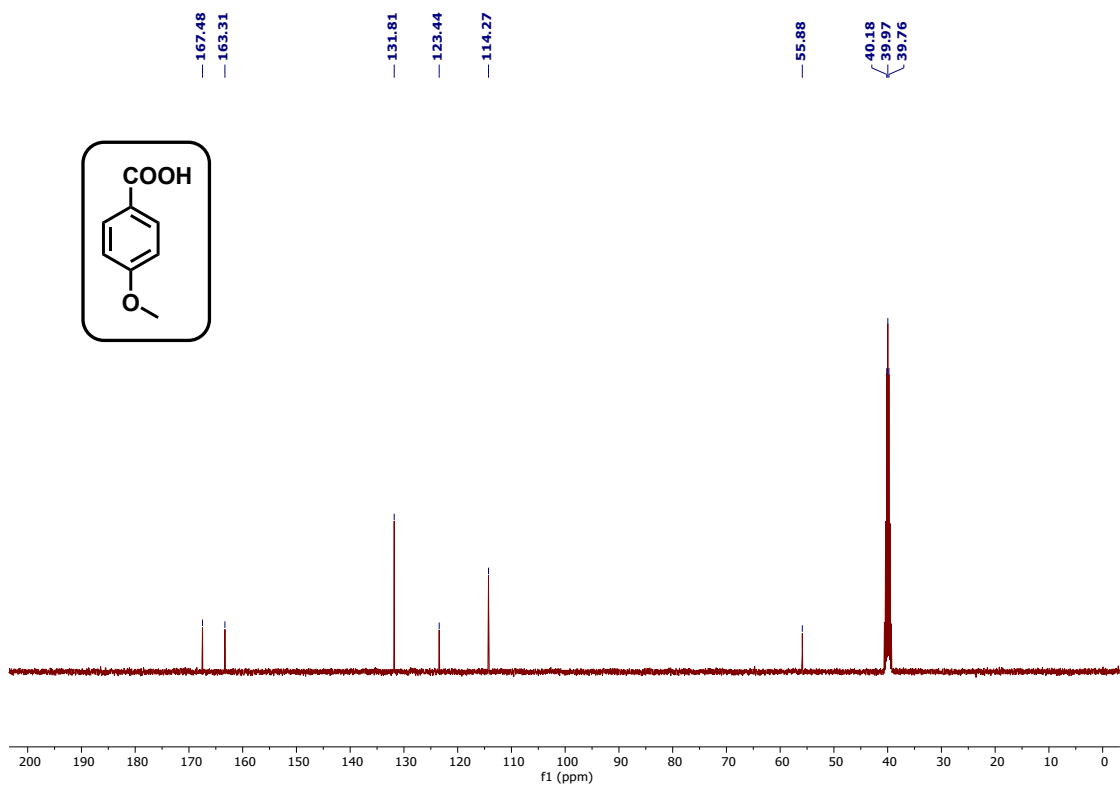

### 3. Zero Pass CHEM21 green metrics toolkit

| Supplementary Information: Appendix 2                                                                   |             |               |      | Summary of Zero Pass Metrics Toolkit |             |             |             |                                                           |                           |                               |             |                  |             |                             |                           |                               |             |  |
|---------------------------------------------------------------------------------------------------------|-------------|---------------|------|--------------------------------------|-------------|-------------|-------------|-----------------------------------------------------------|---------------------------|-------------------------------|-------------|------------------|-------------|-----------------------------|---------------------------|-------------------------------|-------------|--|
| Yield, conversion, selectivity, AE, RME                                                                 |             |               |      |                                      |             |             |             |                                                           |                           |                               |             |                  |             |                             |                           |                               |             |  |
| Reactant (Limiting Reactant First)                                                                      | Mass (g)    | MW            | Mol  | Catalyst                             | Mass (g)    | Reagent     | Mass (g)    | Reaction solvent                                          | Volume (cm <sup>3</sup> ) | Density (g ml <sup>-1</sup> ) | Mass (g)    | Work up chemical | Mass (g)    | Workup solvent              | Volume (cm <sup>3</sup> ) | Density (g ml <sup>-1</sup> ) | Mass (g)    |  |
| 4-methoxy benzyl alcoho                                                                                 | 0.050       | 138.16        | 0.00 | Ni                                   | 0.02        |             |             | Isopropanol                                               | 2.00                      | 0.79                          | 1.57        |                  |             |                             |                           |                               | 0.00        |  |
| Oxygen                                                                                                  |             | 32.00         | 0.00 |                                      |             |             |             |                                                           |                           |                               | 0.00        |                  |             |                             |                           |                               | 0.00        |  |
| <b>Total</b>                                                                                            | <b>0.05</b> | <b>170.16</b> |      |                                      | <b>0.02</b> |             | <b>0.00</b> |                                                           |                           |                               | <b>1.57</b> |                  | <b>0.00</b> |                             |                           |                               | <b>0.00</b> |  |
|                                                                                                         |             |               |      |                                      |             | Flag        |             |                                                           |                           |                               |             |                  |             |                             |                           |                               |             |  |
| $AE = \frac{\text{molecular weight of product}}{\text{total molecular weight of reactants}} \times 100$ |             |               |      |                                      |             | Yield       | 93.0        | ●                                                         | 93.0                      |                               |             |                  |             |                             |                           |                               |             |  |
|                                                                                                         |             |               |      |                                      |             | Conversion  | 94.0        | ●                                                         | 94.0                      |                               |             |                  |             |                             |                           |                               |             |  |
|                                                                                                         |             |               |      |                                      |             | Selectivity | 98.9        | ●                                                         | 98.9                      |                               |             |                  |             |                             |                           |                               |             |  |
| $RME = \frac{\text{mass of isolated product}}{\text{total mass of reactants}} \times 100$               |             |               |      |                                      |             | AE          | 80.0        |                                                           |                           |                               |             |                  | Product     | mass                        | mw                        | mol                           |             |  |
|                                                                                                         |             |               |      |                                      |             | RME         | 91.6        |                                                           |                           |                               |             |                  |             | 0.046                       | 136.150                   | 0.0003364                     |             |  |
|                                                                                                         |             |               |      |                                      |             |             |             |                                                           |                           |                               |             |                  |             | Unreacted limiting reactant | mass                      |                               |             |  |
|                                                                                                         |             |               |      |                                      |             |             |             |                                                           |                           |                               |             |                  |             |                             | 0.003                     |                               |             |  |
| <b>Solvents (Zero Pass)</b>                                                                             |             |               |      |                                      |             |             |             |                                                           |                           |                               |             |                  |             |                             |                           |                               |             |  |
| <b>Highly hazardous solvents (Red flag for any of the following)</b>                                    |             |               |      |                                      |             |             |             | <b>List Highly Hazardous Solvents Below</b>               |                           |                               |             |                  |             |                             |                           |                               |             |  |
| Et <sub>2</sub> O, Benzene, CCl <sub>4</sub> , chloroform, DCE, nitromethane, CS <sub>2</sub> , HMPA    |             |               |      |                                      |             |             |             | None                                                      |                           |                               |             |                  |             |                             |                           |                               |             |  |
| <b>Health and Safety (Zero Pass)</b>                                                                    |             |               |      |                                      |             |             |             |                                                           |                           |                               |             |                  |             |                             |                           |                               |             |  |
| <b>Health &amp; safety (Red flag for any of the following)</b>                                          |             |               |      |                                      |             |             |             | <b>List substances plus the red flagged H-codes below</b> |                           |                               |             |                  |             |                             |                           |                               |             |  |
| Highly explosive                                                                                        |             |               |      | H200, H201, H202, H203               |             |             |             | None                                                      |                           |                               |             |                  |             |                             |                           |                               |             |  |
| Explosive thermal runaway                                                                               |             |               |      | H240                                 |             |             |             | None                                                      |                           |                               |             |                  |             |                             |                           |                               |             |  |
| Fatally toxic                                                                                           |             |               |      | H300, H310, H330                     |             |             |             | None                                                      |                           |                               |             |                  |             |                             |                           |                               |             |  |
| Mutagenic                                                                                               |             |               |      | H350                                 |             |             |             | None                                                      |                           |                               |             |                  |             |                             |                           |                               |             |  |
| Repro-toxic                                                                                             |             |               |      | H360                                 |             |             |             | None                                                      |                           |                               |             |                  |             |                             |                           |                               |             |  |
| Serious environmental implications                                                                      |             |               |      | H420                                 |             |             |             | None                                                      |                           |                               |             |                  |             |                             |                           |                               |             |  |

## 4. First Pass CHEM21 green metrics toolkit

| Supplementary Information: Appendix 2                                                                                                                                                                                                                                                                                                                                                                                                                                                                                                                                                                                                                                                                                                                                                                                                                                                                                                                                                                                                                                                                                                                                                                                                                                                                                                                                                                                                                                                                                                                                                                                                                                                                                                                                                                                                                                                                                                                                                                                                                                                                                                                                                                                                                                                                                                                                                                                                                                                                                                                                                                                                                                                                                                        |             |                                                                                                                                                                                         |       | Summary of First Pass Metrics Toolkit |             |         |             |                  |                           |                               |             |                             |             |                |                           |                               |             |      |  |  |  |  |  |  |  |  |  |  |  |      |    |     |  |  |  |       |      |  |  |  |  |  |  |  |       |        |        |  |  |  |  |  |  |            |      |  |  |  |  |      |  |  |  |  |  |  |  |  |  |  |  |             |      |  |                             |  |  |  |  |  |  |  |  |  |  |  |  |  |  |       |      |  |  |  |  |  |  |  |  |  |  |  |  |  |  |  |  |     |      |  |  |  |  |  |  |  |  |       |  |  |  |  |  |  |  |           |      |  |  |  |  |  |  |  |  |  |  |  |  |  |  |  |  |              |      |  |  |  |  |  |  |  |  |  |  |  |  |  |  |  |  |                                   |     |  |  |  |  |  |  |  |  |  |  |  |  |  |  |  |  |                       |      |  |  |  |  |  |  |  |  |  |  |  |  |  |  |  |  |            |     |  |  |  |  |  |  |  |  |  |  |  |  |  |  |  |  |                     |     |  |  |  |  |  |  |  |  |  |  |  |  |  |  |  |  |                     |     |  |  |  |  |  |  |  |  |  |  |  |  |  |  |  |  |
|----------------------------------------------------------------------------------------------------------------------------------------------------------------------------------------------------------------------------------------------------------------------------------------------------------------------------------------------------------------------------------------------------------------------------------------------------------------------------------------------------------------------------------------------------------------------------------------------------------------------------------------------------------------------------------------------------------------------------------------------------------------------------------------------------------------------------------------------------------------------------------------------------------------------------------------------------------------------------------------------------------------------------------------------------------------------------------------------------------------------------------------------------------------------------------------------------------------------------------------------------------------------------------------------------------------------------------------------------------------------------------------------------------------------------------------------------------------------------------------------------------------------------------------------------------------------------------------------------------------------------------------------------------------------------------------------------------------------------------------------------------------------------------------------------------------------------------------------------------------------------------------------------------------------------------------------------------------------------------------------------------------------------------------------------------------------------------------------------------------------------------------------------------------------------------------------------------------------------------------------------------------------------------------------------------------------------------------------------------------------------------------------------------------------------------------------------------------------------------------------------------------------------------------------------------------------------------------------------------------------------------------------------------------------------------------------------------------------------------------------|-------------|-----------------------------------------------------------------------------------------------------------------------------------------------------------------------------------------|-------|---------------------------------------|-------------|---------|-------------|------------------|---------------------------|-------------------------------|-------------|-----------------------------|-------------|----------------|---------------------------|-------------------------------|-------------|------|--|--|--|--|--|--|--|--|--|--|--|------|----|-----|--|--|--|-------|------|--|--|--|--|--|--|--|-------|--------|--------|--|--|--|--|--|--|------------|------|--|--|--|--|------|--|--|--|--|--|--|--|--|--|--|--|-------------|------|--|-----------------------------|--|--|--|--|--|--|--|--|--|--|--|--|--|--|-------|------|--|--|--|--|--|--|--|--|--|--|--|--|--|--|--|--|-----|------|--|--|--|--|--|--|--|--|-------|--|--|--|--|--|--|--|-----------|------|--|--|--|--|--|--|--|--|--|--|--|--|--|--|--|--|--------------|------|--|--|--|--|--|--|--|--|--|--|--|--|--|--|--|--|-----------------------------------|-----|--|--|--|--|--|--|--|--|--|--|--|--|--|--|--|--|-----------------------|------|--|--|--|--|--|--|--|--|--|--|--|--|--|--|--|--|------------|-----|--|--|--|--|--|--|--|--|--|--|--|--|--|--|--|--|---------------------|-----|--|--|--|--|--|--|--|--|--|--|--|--|--|--|--|--|---------------------|-----|--|--|--|--|--|--|--|--|--|--|--|--|--|--|--|--|
| Yield, AE, RME, MI/PMI and OE                                                                                                                                                                                                                                                                                                                                                                                                                                                                                                                                                                                                                                                                                                                                                                                                                                                                                                                                                                                                                                                                                                                                                                                                                                                                                                                                                                                                                                                                                                                                                                                                                                                                                                                                                                                                                                                                                                                                                                                                                                                                                                                                                                                                                                                                                                                                                                                                                                                                                                                                                                                                                                                                                                                |             |                                                                                                                                                                                         |       |                                       |             |         |             |                  |                           |                               |             |                             |             |                |                           |                               |             |      |  |  |  |  |  |  |  |  |  |  |  |      |    |     |  |  |  |       |      |  |  |  |  |  |  |  |       |        |        |  |  |  |  |  |  |            |      |  |  |  |  |      |  |  |  |  |  |  |  |  |  |  |  |             |      |  |                             |  |  |  |  |  |  |  |  |  |  |  |  |  |  |       |      |  |  |  |  |  |  |  |  |  |  |  |  |  |  |  |  |     |      |  |  |  |  |  |  |  |  |       |  |  |  |  |  |  |  |           |      |  |  |  |  |  |  |  |  |  |  |  |  |  |  |  |  |              |      |  |  |  |  |  |  |  |  |  |  |  |  |  |  |  |  |                                   |     |  |  |  |  |  |  |  |  |  |  |  |  |  |  |  |  |                       |      |  |  |  |  |  |  |  |  |  |  |  |  |  |  |  |  |            |     |  |  |  |  |  |  |  |  |  |  |  |  |  |  |  |  |                     |     |  |  |  |  |  |  |  |  |  |  |  |  |  |  |  |  |                     |     |  |  |  |  |  |  |  |  |  |  |  |  |  |  |  |  |
| Reactant (Limiting Reactant First)                                                                                                                                                                                                                                                                                                                                                                                                                                                                                                                                                                                                                                                                                                                                                                                                                                                                                                                                                                                                                                                                                                                                                                                                                                                                                                                                                                                                                                                                                                                                                                                                                                                                                                                                                                                                                                                                                                                                                                                                                                                                                                                                                                                                                                                                                                                                                                                                                                                                                                                                                                                                                                                                                                           | Mass (g)    | MW                                                                                                                                                                                      | Mol   | Catalyst                              | Mass (g)    | Reagent | Mass (g)    | Reaction solvent | Volume (cm <sup>3</sup> ) | Density (g ml <sup>-1</sup> ) | Mass (g)    | Work up chemical            | Mass (g)    | Workup solvent | Volume (cm <sup>3</sup> ) | Density (g ml <sup>-1</sup> ) | Mass (g)    |      |  |  |  |  |  |  |  |  |  |  |  |      |    |     |  |  |  |       |      |  |  |  |  |  |  |  |       |        |        |  |  |  |  |  |  |            |      |  |  |  |  |      |  |  |  |  |  |  |  |  |  |  |  |             |      |  |                             |  |  |  |  |  |  |  |  |  |  |  |  |  |  |       |      |  |  |  |  |  |  |  |  |  |  |  |  |  |  |  |  |     |      |  |  |  |  |  |  |  |  |       |  |  |  |  |  |  |  |           |      |  |  |  |  |  |  |  |  |  |  |  |  |  |  |  |  |              |      |  |  |  |  |  |  |  |  |  |  |  |  |  |  |  |  |                                   |     |  |  |  |  |  |  |  |  |  |  |  |  |  |  |  |  |                       |      |  |  |  |  |  |  |  |  |  |  |  |  |  |  |  |  |            |     |  |  |  |  |  |  |  |  |  |  |  |  |  |  |  |  |                     |     |  |  |  |  |  |  |  |  |  |  |  |  |  |  |  |  |                     |     |  |  |  |  |  |  |  |  |  |  |  |  |  |  |  |  |
| 4-methoxy benzyl alcohol                                                                                                                                                                                                                                                                                                                                                                                                                                                                                                                                                                                                                                                                                                                                                                                                                                                                                                                                                                                                                                                                                                                                                                                                                                                                                                                                                                                                                                                                                                                                                                                                                                                                                                                                                                                                                                                                                                                                                                                                                                                                                                                                                                                                                                                                                                                                                                                                                                                                                                                                                                                                                                                                                                                     | 0.050       | 138.16                                                                                                                                                                                  | 0.000 | Ni                                    | 0.02        |         |             | Isopropanol      | 2.00                      | 0.79                          | 1.57        |                             |             |                |                           |                               | 0.00        |      |  |  |  |  |  |  |  |  |  |  |  |      |    |     |  |  |  |       |      |  |  |  |  |  |  |  |       |        |        |  |  |  |  |  |  |            |      |  |  |  |  |      |  |  |  |  |  |  |  |  |  |  |  |             |      |  |                             |  |  |  |  |  |  |  |  |  |  |  |  |  |  |       |      |  |  |  |  |  |  |  |  |  |  |  |  |  |  |  |  |     |      |  |  |  |  |  |  |  |  |       |  |  |  |  |  |  |  |           |      |  |  |  |  |  |  |  |  |  |  |  |  |  |  |  |  |              |      |  |  |  |  |  |  |  |  |  |  |  |  |  |  |  |  |                                   |     |  |  |  |  |  |  |  |  |  |  |  |  |  |  |  |  |                       |      |  |  |  |  |  |  |  |  |  |  |  |  |  |  |  |  |            |     |  |  |  |  |  |  |  |  |  |  |  |  |  |  |  |  |                     |     |  |  |  |  |  |  |  |  |  |  |  |  |  |  |  |  |                     |     |  |  |  |  |  |  |  |  |  |  |  |  |  |  |  |  |
| Oxygen                                                                                                                                                                                                                                                                                                                                                                                                                                                                                                                                                                                                                                                                                                                                                                                                                                                                                                                                                                                                                                                                                                                                                                                                                                                                                                                                                                                                                                                                                                                                                                                                                                                                                                                                                                                                                                                                                                                                                                                                                                                                                                                                                                                                                                                                                                                                                                                                                                                                                                                                                                                                                                                                                                                                       |             | 32.00                                                                                                                                                                                   | 0.00  |                                       |             |         |             |                  |                           |                               | 0.00        |                             |             |                |                           |                               | 0.00        |      |  |  |  |  |  |  |  |  |  |  |  |      |    |     |  |  |  |       |      |  |  |  |  |  |  |  |       |        |        |  |  |  |  |  |  |            |      |  |  |  |  |      |  |  |  |  |  |  |  |  |  |  |  |             |      |  |                             |  |  |  |  |  |  |  |  |  |  |  |  |  |  |       |      |  |  |  |  |  |  |  |  |  |  |  |  |  |  |  |  |     |      |  |  |  |  |  |  |  |  |       |  |  |  |  |  |  |  |           |      |  |  |  |  |  |  |  |  |  |  |  |  |  |  |  |  |              |      |  |  |  |  |  |  |  |  |  |  |  |  |  |  |  |  |                                   |     |  |  |  |  |  |  |  |  |  |  |  |  |  |  |  |  |                       |      |  |  |  |  |  |  |  |  |  |  |  |  |  |  |  |  |            |     |  |  |  |  |  |  |  |  |  |  |  |  |  |  |  |  |                     |     |  |  |  |  |  |  |  |  |  |  |  |  |  |  |  |  |                     |     |  |  |  |  |  |  |  |  |  |  |  |  |  |  |  |  |
| <b>Total</b>                                                                                                                                                                                                                                                                                                                                                                                                                                                                                                                                                                                                                                                                                                                                                                                                                                                                                                                                                                                                                                                                                                                                                                                                                                                                                                                                                                                                                                                                                                                                                                                                                                                                                                                                                                                                                                                                                                                                                                                                                                                                                                                                                                                                                                                                                                                                                                                                                                                                                                                                                                                                                                                                                                                                 | <b>0.05</b> | <b>170.16</b>                                                                                                                                                                           |       |                                       | <b>0.02</b> |         | <b>0.00</b> |                  |                           |                               | <b>1.57</b> |                             | <b>0.00</b> |                |                           |                               | <b>0.00</b> |      |  |  |  |  |  |  |  |  |  |  |  |      |    |     |  |  |  |       |      |  |  |  |  |  |  |  |       |        |        |  |  |  |  |  |  |            |      |  |  |  |  |      |  |  |  |  |  |  |  |  |  |  |  |             |      |  |                             |  |  |  |  |  |  |  |  |  |  |  |  |  |  |       |      |  |  |  |  |  |  |  |  |  |  |  |  |  |  |  |  |     |      |  |  |  |  |  |  |  |  |       |  |  |  |  |  |  |  |           |      |  |  |  |  |  |  |  |  |  |  |  |  |  |  |  |  |              |      |  |  |  |  |  |  |  |  |  |  |  |  |  |  |  |  |                                   |     |  |  |  |  |  |  |  |  |  |  |  |  |  |  |  |  |                       |      |  |  |  |  |  |  |  |  |  |  |  |  |  |  |  |  |            |     |  |  |  |  |  |  |  |  |  |  |  |  |  |  |  |  |                     |     |  |  |  |  |  |  |  |  |  |  |  |  |  |  |  |  |                     |     |  |  |  |  |  |  |  |  |  |  |  |  |  |  |  |  |
| <table border="1" style="width: 100%; border-collapse: collapse;"> <tr> <td colspan="18" style="text-align: center;">Flag</td> </tr> <tr> <td>Yield</td> <td>93.0</td> <td></td> </tr> <tr> <td>Conversion</td> <td>94.0</td> <td></td> </tr> <tr> <td>Selectivity</td> <td>98.9</td> <td></td> </tr> <tr> <td>AE</td> <td>80.0</td> <td></td> </tr> <tr> <td>RME</td> <td>91.6</td> <td></td> <td></td> <td></td> <td></td> <td></td> <td></td> <td></td> <td></td> <td>114.5</td> <td></td> <td></td> <td></td> <td></td> <td></td> <td></td> <td></td> </tr> <tr> <td>PMI total</td> <td>35.7</td> <td></td> </tr> <tr> <td>PMI Reaction</td> <td>35.7</td> <td></td> </tr> <tr> <td>PMI reactants, reagents, catalyst</td> <td>1.4</td> <td></td> </tr> <tr> <td>PMI reaction solvents</td> <td>34.3</td> <td></td> </tr> <tr> <td>PMI Workup</td> <td>0.0</td> <td></td> </tr> <tr> <td>PMI Workup chemical</td> <td>0.0</td> <td></td> </tr> <tr> <td>PMI workup solvents</td> <td>0.0</td> <td></td> </tr> </table> |             |                                                                                                                                                                                         |       |                                       |             |         |             |                  |                           |                               |             |                             |             |                |                           |                               |             | Flag |  |  |  |  |  |  |  |  |  |  |  |      |    |     |  |  |  | Yield | 93.0 |  |  |  |  |  |  |  |       |        |        |  |  |  |  |  |  | Conversion | 94.0 |  |  |  |  |      |  |  |  |  |  |  |  |  |  |  |  | Selectivity | 98.9 |  |                             |  |  |  |  |  |  |  |  |  |  |  |  |  |  | AE    | 80.0 |  |  |  |  |  |  |  |  |  |  |  |  |  |  |  |  | RME | 91.6 |  |  |  |  |  |  |  |  | 114.5 |  |  |  |  |  |  |  | PMI total | 35.7 |  |  |  |  |  |  |  |  |  |  |  |  |  |  |  |  | PMI Reaction | 35.7 |  |  |  |  |  |  |  |  |  |  |  |  |  |  |  |  | PMI reactants, reagents, catalyst | 1.4 |  |  |  |  |  |  |  |  |  |  |  |  |  |  |  |  | PMI reaction solvents | 34.3 |  |  |  |  |  |  |  |  |  |  |  |  |  |  |  |  | PMI Workup | 0.0 |  |  |  |  |  |  |  |  |  |  |  |  |  |  |  |  | PMI Workup chemical | 0.0 |  |  |  |  |  |  |  |  |  |  |  |  |  |  |  |  | PMI workup solvents | 0.0 |  |  |  |  |  |  |  |  |  |  |  |  |  |  |  |  |
| Flag                                                                                                                                                                                                                                                                                                                                                                                                                                                                                                                                                                                                                                                                                                                                                                                                                                                                                                                                                                                                                                                                                                                                                                                                                                                                                                                                                                                                                                                                                                                                                                                                                                                                                                                                                                                                                                                                                                                                                                                                                                                                                                                                                                                                                                                                                                                                                                                                                                                                                                                                                                                                                                                                                                                                         |             |                                                                                                                                                                                         |       |                                       |             |         |             |                  |                           |                               |             |                             |             |                |                           |                               |             |      |  |  |  |  |  |  |  |  |  |  |  |      |    |     |  |  |  |       |      |  |  |  |  |  |  |  |       |        |        |  |  |  |  |  |  |            |      |  |  |  |  |      |  |  |  |  |  |  |  |  |  |  |  |             |      |  |                             |  |  |  |  |  |  |  |  |  |  |  |  |  |  |       |      |  |  |  |  |  |  |  |  |  |  |  |  |  |  |  |  |     |      |  |  |  |  |  |  |  |  |       |  |  |  |  |  |  |  |           |      |  |  |  |  |  |  |  |  |  |  |  |  |  |  |  |  |              |      |  |  |  |  |  |  |  |  |  |  |  |  |  |  |  |  |                                   |     |  |  |  |  |  |  |  |  |  |  |  |  |  |  |  |  |                       |      |  |  |  |  |  |  |  |  |  |  |  |  |  |  |  |  |            |     |  |  |  |  |  |  |  |  |  |  |  |  |  |  |  |  |                     |     |  |  |  |  |  |  |  |  |  |  |  |  |  |  |  |  |                     |     |  |  |  |  |  |  |  |  |  |  |  |  |  |  |  |  |
| Yield                                                                                                                                                                                                                                                                                                                                                                                                                                                                                                                                                                                                                                                                                                                                                                                                                                                                                                                                                                                                                                                                                                                                                                                                                                                                                                                                                                                                                                                                                                                                                                                                                                                                                                                                                                                                                                                                                                                                                                                                                                                                                                                                                                                                                                                                                                                                                                                                                                                                                                                                                                                                                                                                                                                                        | 93.0        |                                                                                                                                                                                         |       |                                       |             |         |             |                  |                           |                               |             |                             |             |                |                           |                               |             |      |  |  |  |  |  |  |  |  |  |  |  |      |    |     |  |  |  |       |      |  |  |  |  |  |  |  |       |        |        |  |  |  |  |  |  |            |      |  |  |  |  |      |  |  |  |  |  |  |  |  |  |  |  |             |      |  |                             |  |  |  |  |  |  |  |  |  |  |  |  |  |  |       |      |  |  |  |  |  |  |  |  |  |  |  |  |  |  |  |  |     |      |  |  |  |  |  |  |  |  |       |  |  |  |  |  |  |  |           |      |  |  |  |  |  |  |  |  |  |  |  |  |  |  |  |  |              |      |  |  |  |  |  |  |  |  |  |  |  |  |  |  |  |  |                                   |     |  |  |  |  |  |  |  |  |  |  |  |  |  |  |  |  |                       |      |  |  |  |  |  |  |  |  |  |  |  |  |  |  |  |  |            |     |  |  |  |  |  |  |  |  |  |  |  |  |  |  |  |  |                     |     |  |  |  |  |  |  |  |  |  |  |  |  |  |  |  |  |                     |     |  |  |  |  |  |  |  |  |  |  |  |  |  |  |  |  |
| Conversion                                                                                                                                                                                                                                                                                                                                                                                                                                                                                                                                                                                                                                                                                                                                                                                                                                                                                                                                                                                                                                                                                                                                                                                                                                                                                                                                                                                                                                                                                                                                                                                                                                                                                                                                                                                                                                                                                                                                                                                                                                                                                                                                                                                                                                                                                                                                                                                                                                                                                                                                                                                                                                                                                                                                   | 94.0        |                                                                                                                                                                                         |       |                                       |             |         |             |                  |                           |                               |             |                             |             |                |                           |                               |             |      |  |  |  |  |  |  |  |  |  |  |  |      |    |     |  |  |  |       |      |  |  |  |  |  |  |  |       |        |        |  |  |  |  |  |  |            |      |  |  |  |  |      |  |  |  |  |  |  |  |  |  |  |  |             |      |  |                             |  |  |  |  |  |  |  |  |  |  |  |  |  |  |       |      |  |  |  |  |  |  |  |  |  |  |  |  |  |  |  |  |     |      |  |  |  |  |  |  |  |  |       |  |  |  |  |  |  |  |           |      |  |  |  |  |  |  |  |  |  |  |  |  |  |  |  |  |              |      |  |  |  |  |  |  |  |  |  |  |  |  |  |  |  |  |                                   |     |  |  |  |  |  |  |  |  |  |  |  |  |  |  |  |  |                       |      |  |  |  |  |  |  |  |  |  |  |  |  |  |  |  |  |            |     |  |  |  |  |  |  |  |  |  |  |  |  |  |  |  |  |                     |     |  |  |  |  |  |  |  |  |  |  |  |  |  |  |  |  |                     |     |  |  |  |  |  |  |  |  |  |  |  |  |  |  |  |  |
| Selectivity                                                                                                                                                                                                                                                                                                                                                                                                                                                                                                                                                                                                                                                                                                                                                                                                                                                                                                                                                                                                                                                                                                                                                                                                                                                                                                                                                                                                                                                                                                                                                                                                                                                                                                                                                                                                                                                                                                                                                                                                                                                                                                                                                                                                                                                                                                                                                                                                                                                                                                                                                                                                                                                                                                                                  | 98.9        |                                                                                                                                                                                         |       |                                       |             |         |             |                  |                           |                               |             |                             |             |                |                           |                               |             |      |  |  |  |  |  |  |  |  |  |  |  |      |    |     |  |  |  |       |      |  |  |  |  |  |  |  |       |        |        |  |  |  |  |  |  |            |      |  |  |  |  |      |  |  |  |  |  |  |  |  |  |  |  |             |      |  |                             |  |  |  |  |  |  |  |  |  |  |  |  |  |  |       |      |  |  |  |  |  |  |  |  |  |  |  |  |  |  |  |  |     |      |  |  |  |  |  |  |  |  |       |  |  |  |  |  |  |  |           |      |  |  |  |  |  |  |  |  |  |  |  |  |  |  |  |  |              |      |  |  |  |  |  |  |  |  |  |  |  |  |  |  |  |  |                                   |     |  |  |  |  |  |  |  |  |  |  |  |  |  |  |  |  |                       |      |  |  |  |  |  |  |  |  |  |  |  |  |  |  |  |  |            |     |  |  |  |  |  |  |  |  |  |  |  |  |  |  |  |  |                     |     |  |  |  |  |  |  |  |  |  |  |  |  |  |  |  |  |                     |     |  |  |  |  |  |  |  |  |  |  |  |  |  |  |  |  |
| AE                                                                                                                                                                                                                                                                                                                                                                                                                                                                                                                                                                                                                                                                                                                                                                                                                                                                                                                                                                                                                                                                                                                                                                                                                                                                                                                                                                                                                                                                                                                                                                                                                                                                                                                                                                                                                                                                                                                                                                                                                                                                                                                                                                                                                                                                                                                                                                                                                                                                                                                                                                                                                                                                                                                                           | 80.0        |                                                                                                                                                                                         |       |                                       |             |         |             |                  |                           |                               |             |                             |             |                |                           |                               |             |      |  |  |  |  |  |  |  |  |  |  |  |      |    |     |  |  |  |       |      |  |  |  |  |  |  |  |       |        |        |  |  |  |  |  |  |            |      |  |  |  |  |      |  |  |  |  |  |  |  |  |  |  |  |             |      |  |                             |  |  |  |  |  |  |  |  |  |  |  |  |  |  |       |      |  |  |  |  |  |  |  |  |  |  |  |  |  |  |  |  |     |      |  |  |  |  |  |  |  |  |       |  |  |  |  |  |  |  |           |      |  |  |  |  |  |  |  |  |  |  |  |  |  |  |  |  |              |      |  |  |  |  |  |  |  |  |  |  |  |  |  |  |  |  |                                   |     |  |  |  |  |  |  |  |  |  |  |  |  |  |  |  |  |                       |      |  |  |  |  |  |  |  |  |  |  |  |  |  |  |  |  |            |     |  |  |  |  |  |  |  |  |  |  |  |  |  |  |  |  |                     |     |  |  |  |  |  |  |  |  |  |  |  |  |  |  |  |  |                     |     |  |  |  |  |  |  |  |  |  |  |  |  |  |  |  |  |
| RME                                                                                                                                                                                                                                                                                                                                                                                                                                                                                                                                                                                                                                                                                                                                                                                                                                                                                                                                                                                                                                                                                                                                                                                                                                                                                                                                                                                                                                                                                                                                                                                                                                                                                                                                                                                                                                                                                                                                                                                                                                                                                                                                                                                                                                                                                                                                                                                                                                                                                                                                                                                                                                                                                                                                          | 91.6        |                                                                                                                                                                                         |       |                                       |             |         |             |                  |                           | 114.5                         |             |                             |             |                |                           |                               |             |      |  |  |  |  |  |  |  |  |  |  |  |      |    |     |  |  |  |       |      |  |  |  |  |  |  |  |       |        |        |  |  |  |  |  |  |            |      |  |  |  |  |      |  |  |  |  |  |  |  |  |  |  |  |             |      |  |                             |  |  |  |  |  |  |  |  |  |  |  |  |  |  |       |      |  |  |  |  |  |  |  |  |  |  |  |  |  |  |  |  |     |      |  |  |  |  |  |  |  |  |       |  |  |  |  |  |  |  |           |      |  |  |  |  |  |  |  |  |  |  |  |  |  |  |  |  |              |      |  |  |  |  |  |  |  |  |  |  |  |  |  |  |  |  |                                   |     |  |  |  |  |  |  |  |  |  |  |  |  |  |  |  |  |                       |      |  |  |  |  |  |  |  |  |  |  |  |  |  |  |  |  |            |     |  |  |  |  |  |  |  |  |  |  |  |  |  |  |  |  |                     |     |  |  |  |  |  |  |  |  |  |  |  |  |  |  |  |  |                     |     |  |  |  |  |  |  |  |  |  |  |  |  |  |  |  |  |
| PMI total                                                                                                                                                                                                                                                                                                                                                                                                                                                                                                                                                                                                                                                                                                                                                                                                                                                                                                                                                                                                                                                                                                                                                                                                                                                                                                                                                                                                                                                                                                                                                                                                                                                                                                                                                                                                                                                                                                                                                                                                                                                                                                                                                                                                                                                                                                                                                                                                                                                                                                                                                                                                                                                                                                                                    | 35.7        |                                                                                                                                                                                         |       |                                       |             |         |             |                  |                           |                               |             |                             |             |                |                           |                               |             |      |  |  |  |  |  |  |  |  |  |  |  |      |    |     |  |  |  |       |      |  |  |  |  |  |  |  |       |        |        |  |  |  |  |  |  |            |      |  |  |  |  |      |  |  |  |  |  |  |  |  |  |  |  |             |      |  |                             |  |  |  |  |  |  |  |  |  |  |  |  |  |  |       |      |  |  |  |  |  |  |  |  |  |  |  |  |  |  |  |  |     |      |  |  |  |  |  |  |  |  |       |  |  |  |  |  |  |  |           |      |  |  |  |  |  |  |  |  |  |  |  |  |  |  |  |  |              |      |  |  |  |  |  |  |  |  |  |  |  |  |  |  |  |  |                                   |     |  |  |  |  |  |  |  |  |  |  |  |  |  |  |  |  |                       |      |  |  |  |  |  |  |  |  |  |  |  |  |  |  |  |  |            |     |  |  |  |  |  |  |  |  |  |  |  |  |  |  |  |  |                     |     |  |  |  |  |  |  |  |  |  |  |  |  |  |  |  |  |                     |     |  |  |  |  |  |  |  |  |  |  |  |  |  |  |  |  |
| PMI Reaction                                                                                                                                                                                                                                                                                                                                                                                                                                                                                                                                                                                                                                                                                                                                                                                                                                                                                                                                                                                                                                                                                                                                                                                                                                                                                                                                                                                                                                                                                                                                                                                                                                                                                                                                                                                                                                                                                                                                                                                                                                                                                                                                                                                                                                                                                                                                                                                                                                                                                                                                                                                                                                                                                                                                 | 35.7        |                                                                                                                                                                                         |       |                                       |             |         |             |                  |                           |                               |             |                             |             |                |                           |                               |             |      |  |  |  |  |  |  |  |  |  |  |  |      |    |     |  |  |  |       |      |  |  |  |  |  |  |  |       |        |        |  |  |  |  |  |  |            |      |  |  |  |  |      |  |  |  |  |  |  |  |  |  |  |  |             |      |  |                             |  |  |  |  |  |  |  |  |  |  |  |  |  |  |       |      |  |  |  |  |  |  |  |  |  |  |  |  |  |  |  |  |     |      |  |  |  |  |  |  |  |  |       |  |  |  |  |  |  |  |           |      |  |  |  |  |  |  |  |  |  |  |  |  |  |  |  |  |              |      |  |  |  |  |  |  |  |  |  |  |  |  |  |  |  |  |                                   |     |  |  |  |  |  |  |  |  |  |  |  |  |  |  |  |  |                       |      |  |  |  |  |  |  |  |  |  |  |  |  |  |  |  |  |            |     |  |  |  |  |  |  |  |  |  |  |  |  |  |  |  |  |                     |     |  |  |  |  |  |  |  |  |  |  |  |  |  |  |  |  |                     |     |  |  |  |  |  |  |  |  |  |  |  |  |  |  |  |  |
| PMI reactants, reagents, catalyst                                                                                                                                                                                                                                                                                                                                                                                                                                                                                                                                                                                                                                                                                                                                                                                                                                                                                                                                                                                                                                                                                                                                                                                                                                                                                                                                                                                                                                                                                                                                                                                                                                                                                                                                                                                                                                                                                                                                                                                                                                                                                                                                                                                                                                                                                                                                                                                                                                                                                                                                                                                                                                                                                                            | 1.4         |                                                                                                                                                                                         |       |                                       |             |         |             |                  |                           |                               |             |                             |             |                |                           |                               |             |      |  |  |  |  |  |  |  |  |  |  |  |      |    |     |  |  |  |       |      |  |  |  |  |  |  |  |       |        |        |  |  |  |  |  |  |            |      |  |  |  |  |      |  |  |  |  |  |  |  |  |  |  |  |             |      |  |                             |  |  |  |  |  |  |  |  |  |  |  |  |  |  |       |      |  |  |  |  |  |  |  |  |  |  |  |  |  |  |  |  |     |      |  |  |  |  |  |  |  |  |       |  |  |  |  |  |  |  |           |      |  |  |  |  |  |  |  |  |  |  |  |  |  |  |  |  |              |      |  |  |  |  |  |  |  |  |  |  |  |  |  |  |  |  |                                   |     |  |  |  |  |  |  |  |  |  |  |  |  |  |  |  |  |                       |      |  |  |  |  |  |  |  |  |  |  |  |  |  |  |  |  |            |     |  |  |  |  |  |  |  |  |  |  |  |  |  |  |  |  |                     |     |  |  |  |  |  |  |  |  |  |  |  |  |  |  |  |  |                     |     |  |  |  |  |  |  |  |  |  |  |  |  |  |  |  |  |
| PMI reaction solvents                                                                                                                                                                                                                                                                                                                                                                                                                                                                                                                                                                                                                                                                                                                                                                                                                                                                                                                                                                                                                                                                                                                                                                                                                                                                                                                                                                                                                                                                                                                                                                                                                                                                                                                                                                                                                                                                                                                                                                                                                                                                                                                                                                                                                                                                                                                                                                                                                                                                                                                                                                                                                                                                                                                        | 34.3        |                                                                                                                                                                                         |       |                                       |             |         |             |                  |                           |                               |             |                             |             |                |                           |                               |             |      |  |  |  |  |  |  |  |  |  |  |  |      |    |     |  |  |  |       |      |  |  |  |  |  |  |  |       |        |        |  |  |  |  |  |  |            |      |  |  |  |  |      |  |  |  |  |  |  |  |  |  |  |  |             |      |  |                             |  |  |  |  |  |  |  |  |  |  |  |  |  |  |       |      |  |  |  |  |  |  |  |  |  |  |  |  |  |  |  |  |     |      |  |  |  |  |  |  |  |  |       |  |  |  |  |  |  |  |           |      |  |  |  |  |  |  |  |  |  |  |  |  |  |  |  |  |              |      |  |  |  |  |  |  |  |  |  |  |  |  |  |  |  |  |                                   |     |  |  |  |  |  |  |  |  |  |  |  |  |  |  |  |  |                       |      |  |  |  |  |  |  |  |  |  |  |  |  |  |  |  |  |            |     |  |  |  |  |  |  |  |  |  |  |  |  |  |  |  |  |                     |     |  |  |  |  |  |  |  |  |  |  |  |  |  |  |  |  |                     |     |  |  |  |  |  |  |  |  |  |  |  |  |  |  |  |  |
| PMI Workup                                                                                                                                                                                                                                                                                                                                                                                                                                                                                                                                                                                                                                                                                                                                                                                                                                                                                                                                                                                                                                                                                                                                                                                                                                                                                                                                                                                                                                                                                                                                                                                                                                                                                                                                                                                                                                                                                                                                                                                                                                                                                                                                                                                                                                                                                                                                                                                                                                                                                                                                                                                                                                                                                                                                   | 0.0         |                                                                                                                                                                                         |       |                                       |             |         |             |                  |                           |                               |             |                             |             |                |                           |                               |             |      |  |  |  |  |  |  |  |  |  |  |  |      |    |     |  |  |  |       |      |  |  |  |  |  |  |  |       |        |        |  |  |  |  |  |  |            |      |  |  |  |  |      |  |  |  |  |  |  |  |  |  |  |  |             |      |  |                             |  |  |  |  |  |  |  |  |  |  |  |  |  |  |       |      |  |  |  |  |  |  |  |  |  |  |  |  |  |  |  |  |     |      |  |  |  |  |  |  |  |  |       |  |  |  |  |  |  |  |           |      |  |  |  |  |  |  |  |  |  |  |  |  |  |  |  |  |              |      |  |  |  |  |  |  |  |  |  |  |  |  |  |  |  |  |                                   |     |  |  |  |  |  |  |  |  |  |  |  |  |  |  |  |  |                       |      |  |  |  |  |  |  |  |  |  |  |  |  |  |  |  |  |            |     |  |  |  |  |  |  |  |  |  |  |  |  |  |  |  |  |                     |     |  |  |  |  |  |  |  |  |  |  |  |  |  |  |  |  |                     |     |  |  |  |  |  |  |  |  |  |  |  |  |  |  |  |  |
| PMI Workup chemical                                                                                                                                                                                                                                                                                                                                                                                                                                                                                                                                                                                                                                                                                                                                                                                                                                                                                                                                                                                                                                                                                                                                                                                                                                                                                                                                                                                                                                                                                                                                                                                                                                                                                                                                                                                                                                                                                                                                                                                                                                                                                                                                                                                                                                                                                                                                                                                                                                                                                                                                                                                                                                                                                                                          | 0.0         |                                                                                                                                                                                         |       |                                       |             |         |             |                  |                           |                               |             |                             |             |                |                           |                               |             |      |  |  |  |  |  |  |  |  |  |  |  |      |    |     |  |  |  |       |      |  |  |  |  |  |  |  |       |        |        |  |  |  |  |  |  |            |      |  |  |  |  |      |  |  |  |  |  |  |  |  |  |  |  |             |      |  |                             |  |  |  |  |  |  |  |  |  |  |  |  |  |  |       |      |  |  |  |  |  |  |  |  |  |  |  |  |  |  |  |  |     |      |  |  |  |  |  |  |  |  |       |  |  |  |  |  |  |  |           |      |  |  |  |  |  |  |  |  |  |  |  |  |  |  |  |  |              |      |  |  |  |  |  |  |  |  |  |  |  |  |  |  |  |  |                                   |     |  |  |  |  |  |  |  |  |  |  |  |  |  |  |  |  |                       |      |  |  |  |  |  |  |  |  |  |  |  |  |  |  |  |  |            |     |  |  |  |  |  |  |  |  |  |  |  |  |  |  |  |  |                     |     |  |  |  |  |  |  |  |  |  |  |  |  |  |  |  |  |                     |     |  |  |  |  |  |  |  |  |  |  |  |  |  |  |  |  |
| PMI workup solvents                                                                                                                                                                                                                                                                                                                                                                                                                                                                                                                                                                                                                                                                                                                                                                                                                                                                                                                                                                                                                                                                                                                                                                                                                                                                                                                                                                                                                                                                                                                                                                                                                                                                                                                                                                                                                                                                                                                                                                                                                                                                                                                                                                                                                                                                                                                                                                                                                                                                                                                                                                                                                                                                                                                          | 0.0         |                                                                                                                                                                                         |       |                                       |             |         |             |                  |                           |                               |             |                             |             |                |                           |                               |             |      |  |  |  |  |  |  |  |  |  |  |  |      |    |     |  |  |  |       |      |  |  |  |  |  |  |  |       |        |        |  |  |  |  |  |  |            |      |  |  |  |  |      |  |  |  |  |  |  |  |  |  |  |  |             |      |  |                             |  |  |  |  |  |  |  |  |  |  |  |  |  |  |       |      |  |  |  |  |  |  |  |  |  |  |  |  |  |  |  |  |     |      |  |  |  |  |  |  |  |  |       |  |  |  |  |  |  |  |           |      |  |  |  |  |  |  |  |  |  |  |  |  |  |  |  |  |              |      |  |  |  |  |  |  |  |  |  |  |  |  |  |  |  |  |                                   |     |  |  |  |  |  |  |  |  |  |  |  |  |  |  |  |  |                       |      |  |  |  |  |  |  |  |  |  |  |  |  |  |  |  |  |            |     |  |  |  |  |  |  |  |  |  |  |  |  |  |  |  |  |                     |     |  |  |  |  |  |  |  |  |  |  |  |  |  |  |  |  |                     |     |  |  |  |  |  |  |  |  |  |  |  |  |  |  |  |  |
| <table border="1" style="width: 100%; border-collapse: collapse;"> <tr> <td colspan="12"></td> <td>Mass</td> <td>MW</td> <td>Mol</td> </tr> <tr> <td colspan="12"></td> <td>0.046</td> <td>136.15</td> <td>0.0003</td> </tr> <tr> <td colspan="12"></td> <td colspan="3">mass</td> </tr> <tr> <td colspan="12"></td> <td colspan="3">Unreacted limiting reactant</td> </tr> <tr> <td colspan="12"></td> <td colspan="3">0.003</td> </tr> </table>                                                                                                                                                                                                                                                                                                                                                                                                                                                                                                                                                                                                                                                                                                                                                                                                                                                                                                                                                                                                                                                                                                                                                                                                                                                                                                                                                                                                                                                                                                                                                                                                                                                                                                                                                                                                                                                                                                                                                                                                                                                                                                                                                                                                                                                                                            |             |                                                                                                                                                                                         |       |                                       |             |         |             |                  |                           |                               |             |                             |             |                |                           |                               |             |      |  |  |  |  |  |  |  |  |  |  |  | Mass | MW | Mol |  |  |  |       |      |  |  |  |  |  |  |  | 0.046 | 136.15 | 0.0003 |  |  |  |  |  |  |            |      |  |  |  |  | mass |  |  |  |  |  |  |  |  |  |  |  |             |      |  | Unreacted limiting reactant |  |  |  |  |  |  |  |  |  |  |  |  |  |  | 0.003 |      |  |  |  |  |  |  |  |  |  |  |  |  |  |  |  |  |     |      |  |  |  |  |  |  |  |  |       |  |  |  |  |  |  |  |           |      |  |  |  |  |  |  |  |  |  |  |  |  |  |  |  |  |              |      |  |  |  |  |  |  |  |  |  |  |  |  |  |  |  |  |                                   |     |  |  |  |  |  |  |  |  |  |  |  |  |  |  |  |  |                       |      |  |  |  |  |  |  |  |  |  |  |  |  |  |  |  |  |            |     |  |  |  |  |  |  |  |  |  |  |  |  |  |  |  |  |                     |     |  |  |  |  |  |  |  |  |  |  |  |  |  |  |  |  |                     |     |  |  |  |  |  |  |  |  |  |  |  |  |  |  |  |  |
|                                                                                                                                                                                                                                                                                                                                                                                                                                                                                                                                                                                                                                                                                                                                                                                                                                                                                                                                                                                                                                                                                                                                                                                                                                                                                                                                                                                                                                                                                                                                                                                                                                                                                                                                                                                                                                                                                                                                                                                                                                                                                                                                                                                                                                                                                                                                                                                                                                                                                                                                                                                                                                                                                                                                              |             |                                                                                                                                                                                         |       |                                       |             |         |             |                  |                           |                               |             | Mass                        | MW          | Mol            |                           |                               |             |      |  |  |  |  |  |  |  |  |  |  |  |      |    |     |  |  |  |       |      |  |  |  |  |  |  |  |       |        |        |  |  |  |  |  |  |            |      |  |  |  |  |      |  |  |  |  |  |  |  |  |  |  |  |             |      |  |                             |  |  |  |  |  |  |  |  |  |  |  |  |  |  |       |      |  |  |  |  |  |  |  |  |  |  |  |  |  |  |  |  |     |      |  |  |  |  |  |  |  |  |       |  |  |  |  |  |  |  |           |      |  |  |  |  |  |  |  |  |  |  |  |  |  |  |  |  |              |      |  |  |  |  |  |  |  |  |  |  |  |  |  |  |  |  |                                   |     |  |  |  |  |  |  |  |  |  |  |  |  |  |  |  |  |                       |      |  |  |  |  |  |  |  |  |  |  |  |  |  |  |  |  |            |     |  |  |  |  |  |  |  |  |  |  |  |  |  |  |  |  |                     |     |  |  |  |  |  |  |  |  |  |  |  |  |  |  |  |  |                     |     |  |  |  |  |  |  |  |  |  |  |  |  |  |  |  |  |
|                                                                                                                                                                                                                                                                                                                                                                                                                                                                                                                                                                                                                                                                                                                                                                                                                                                                                                                                                                                                                                                                                                                                                                                                                                                                                                                                                                                                                                                                                                                                                                                                                                                                                                                                                                                                                                                                                                                                                                                                                                                                                                                                                                                                                                                                                                                                                                                                                                                                                                                                                                                                                                                                                                                                              |             |                                                                                                                                                                                         |       |                                       |             |         |             |                  |                           |                               |             | 0.046                       | 136.15      | 0.0003         |                           |                               |             |      |  |  |  |  |  |  |  |  |  |  |  |      |    |     |  |  |  |       |      |  |  |  |  |  |  |  |       |        |        |  |  |  |  |  |  |            |      |  |  |  |  |      |  |  |  |  |  |  |  |  |  |  |  |             |      |  |                             |  |  |  |  |  |  |  |  |  |  |  |  |  |  |       |      |  |  |  |  |  |  |  |  |  |  |  |  |  |  |  |  |     |      |  |  |  |  |  |  |  |  |       |  |  |  |  |  |  |  |           |      |  |  |  |  |  |  |  |  |  |  |  |  |  |  |  |  |              |      |  |  |  |  |  |  |  |  |  |  |  |  |  |  |  |  |                                   |     |  |  |  |  |  |  |  |  |  |  |  |  |  |  |  |  |                       |      |  |  |  |  |  |  |  |  |  |  |  |  |  |  |  |  |            |     |  |  |  |  |  |  |  |  |  |  |  |  |  |  |  |  |                     |     |  |  |  |  |  |  |  |  |  |  |  |  |  |  |  |  |                     |     |  |  |  |  |  |  |  |  |  |  |  |  |  |  |  |  |
|                                                                                                                                                                                                                                                                                                                                                                                                                                                                                                                                                                                                                                                                                                                                                                                                                                                                                                                                                                                                                                                                                                                                                                                                                                                                                                                                                                                                                                                                                                                                                                                                                                                                                                                                                                                                                                                                                                                                                                                                                                                                                                                                                                                                                                                                                                                                                                                                                                                                                                                                                                                                                                                                                                                                              |             |                                                                                                                                                                                         |       |                                       |             |         |             |                  |                           |                               |             | mass                        |             |                |                           |                               |             |      |  |  |  |  |  |  |  |  |  |  |  |      |    |     |  |  |  |       |      |  |  |  |  |  |  |  |       |        |        |  |  |  |  |  |  |            |      |  |  |  |  |      |  |  |  |  |  |  |  |  |  |  |  |             |      |  |                             |  |  |  |  |  |  |  |  |  |  |  |  |  |  |       |      |  |  |  |  |  |  |  |  |  |  |  |  |  |  |  |  |     |      |  |  |  |  |  |  |  |  |       |  |  |  |  |  |  |  |           |      |  |  |  |  |  |  |  |  |  |  |  |  |  |  |  |  |              |      |  |  |  |  |  |  |  |  |  |  |  |  |  |  |  |  |                                   |     |  |  |  |  |  |  |  |  |  |  |  |  |  |  |  |  |                       |      |  |  |  |  |  |  |  |  |  |  |  |  |  |  |  |  |            |     |  |  |  |  |  |  |  |  |  |  |  |  |  |  |  |  |                     |     |  |  |  |  |  |  |  |  |  |  |  |  |  |  |  |  |                     |     |  |  |  |  |  |  |  |  |  |  |  |  |  |  |  |  |
|                                                                                                                                                                                                                                                                                                                                                                                                                                                                                                                                                                                                                                                                                                                                                                                                                                                                                                                                                                                                                                                                                                                                                                                                                                                                                                                                                                                                                                                                                                                                                                                                                                                                                                                                                                                                                                                                                                                                                                                                                                                                                                                                                                                                                                                                                                                                                                                                                                                                                                                                                                                                                                                                                                                                              |             |                                                                                                                                                                                         |       |                                       |             |         |             |                  |                           |                               |             | Unreacted limiting reactant |             |                |                           |                               |             |      |  |  |  |  |  |  |  |  |  |  |  |      |    |     |  |  |  |       |      |  |  |  |  |  |  |  |       |        |        |  |  |  |  |  |  |            |      |  |  |  |  |      |  |  |  |  |  |  |  |  |  |  |  |             |      |  |                             |  |  |  |  |  |  |  |  |  |  |  |  |  |  |       |      |  |  |  |  |  |  |  |  |  |  |  |  |  |  |  |  |     |      |  |  |  |  |  |  |  |  |       |  |  |  |  |  |  |  |           |      |  |  |  |  |  |  |  |  |  |  |  |  |  |  |  |  |              |      |  |  |  |  |  |  |  |  |  |  |  |  |  |  |  |  |                                   |     |  |  |  |  |  |  |  |  |  |  |  |  |  |  |  |  |                       |      |  |  |  |  |  |  |  |  |  |  |  |  |  |  |  |  |            |     |  |  |  |  |  |  |  |  |  |  |  |  |  |  |  |  |                     |     |  |  |  |  |  |  |  |  |  |  |  |  |  |  |  |  |                     |     |  |  |  |  |  |  |  |  |  |  |  |  |  |  |  |  |
|                                                                                                                                                                                                                                                                                                                                                                                                                                                                                                                                                                                                                                                                                                                                                                                                                                                                                                                                                                                                                                                                                                                                                                                                                                                                                                                                                                                                                                                                                                                                                                                                                                                                                                                                                                                                                                                                                                                                                                                                                                                                                                                                                                                                                                                                                                                                                                                                                                                                                                                                                                                                                                                                                                                                              |             |                                                                                                                                                                                         |       |                                       |             |         |             |                  |                           |                               |             | 0.003                       |             |                |                           |                               |             |      |  |  |  |  |  |  |  |  |  |  |  |      |    |     |  |  |  |       |      |  |  |  |  |  |  |  |       |        |        |  |  |  |  |  |  |            |      |  |  |  |  |      |  |  |  |  |  |  |  |  |  |  |  |             |      |  |                             |  |  |  |  |  |  |  |  |  |  |  |  |  |  |       |      |  |  |  |  |  |  |  |  |  |  |  |  |  |  |  |  |     |      |  |  |  |  |  |  |  |  |       |  |  |  |  |  |  |  |           |      |  |  |  |  |  |  |  |  |  |  |  |  |  |  |  |  |              |      |  |  |  |  |  |  |  |  |  |  |  |  |  |  |  |  |                                   |     |  |  |  |  |  |  |  |  |  |  |  |  |  |  |  |  |                       |      |  |  |  |  |  |  |  |  |  |  |  |  |  |  |  |  |            |     |  |  |  |  |  |  |  |  |  |  |  |  |  |  |  |  |                     |     |  |  |  |  |  |  |  |  |  |  |  |  |  |  |  |  |                     |     |  |  |  |  |  |  |  |  |  |  |  |  |  |  |  |  |
| $RME = \frac{\text{mass of isolated product}}{\text{total mass of reactants}} \times 100$                                                                                                                                                                                                                                                                                                                                                                                                                                                                                                                                                                                                                                                                                                                                                                                                                                                                                                                                                                                                                                                                                                                                                                                                                                                                                                                                                                                                                                                                                                                                                                                                                                                                                                                                                                                                                                                                                                                                                                                                                                                                                                                                                                                                                                                                                                                                                                                                                                                                                                                                                                                                                                                    |             |                                                                                                                                                                                         |       |                                       |             |         |             |                  |                           |                               |             |                             |             |                |                           |                               |             |      |  |  |  |  |  |  |  |  |  |  |  |      |    |     |  |  |  |       |      |  |  |  |  |  |  |  |       |        |        |  |  |  |  |  |  |            |      |  |  |  |  |      |  |  |  |  |  |  |  |  |  |  |  |             |      |  |                             |  |  |  |  |  |  |  |  |  |  |  |  |  |  |       |      |  |  |  |  |  |  |  |  |  |  |  |  |  |  |  |  |     |      |  |  |  |  |  |  |  |  |       |  |  |  |  |  |  |  |           |      |  |  |  |  |  |  |  |  |  |  |  |  |  |  |  |  |              |      |  |  |  |  |  |  |  |  |  |  |  |  |  |  |  |  |                                   |     |  |  |  |  |  |  |  |  |  |  |  |  |  |  |  |  |                       |      |  |  |  |  |  |  |  |  |  |  |  |  |  |  |  |  |            |     |  |  |  |  |  |  |  |  |  |  |  |  |  |  |  |  |                     |     |  |  |  |  |  |  |  |  |  |  |  |  |  |  |  |  |                     |     |  |  |  |  |  |  |  |  |  |  |  |  |  |  |  |  |
| $AE = \frac{\text{molecular weight of product}}{\text{total molecular weight of reactants}} \times 100$                                                                                                                                                                                                                                                                                                                                                                                                                                                                                                                                                                                                                                                                                                                                                                                                                                                                                                                                                                                                                                                                                                                                                                                                                                                                                                                                                                                                                                                                                                                                                                                                                                                                                                                                                                                                                                                                                                                                                                                                                                                                                                                                                                                                                                                                                                                                                                                                                                                                                                                                                                                                                                      |             |                                                                                                                                                                                         |       |                                       |             |         |             |                  |                           |                               |             |                             |             |                |                           |                               |             |      |  |  |  |  |  |  |  |  |  |  |  |      |    |     |  |  |  |       |      |  |  |  |  |  |  |  |       |        |        |  |  |  |  |  |  |            |      |  |  |  |  |      |  |  |  |  |  |  |  |  |  |  |  |             |      |  |                             |  |  |  |  |  |  |  |  |  |  |  |  |  |  |       |      |  |  |  |  |  |  |  |  |  |  |  |  |  |  |  |  |     |      |  |  |  |  |  |  |  |  |       |  |  |  |  |  |  |  |           |      |  |  |  |  |  |  |  |  |  |  |  |  |  |  |  |  |              |      |  |  |  |  |  |  |  |  |  |  |  |  |  |  |  |  |                                   |     |  |  |  |  |  |  |  |  |  |  |  |  |  |  |  |  |                       |      |  |  |  |  |  |  |  |  |  |  |  |  |  |  |  |  |            |     |  |  |  |  |  |  |  |  |  |  |  |  |  |  |  |  |                     |     |  |  |  |  |  |  |  |  |  |  |  |  |  |  |  |  |                     |     |  |  |  |  |  |  |  |  |  |  |  |  |  |  |  |  |
| $\text{mass intensity} = \frac{\text{total mass in a process or process step}}{\text{mass of product}}$                                                                                                                                                                                                                                                                                                                                                                                                                                                                                                                                                                                                                                                                                                                                                                                                                                                                                                                                                                                                                                                                                                                                                                                                                                                                                                                                                                                                                                                                                                                                                                                                                                                                                                                                                                                                                                                                                                                                                                                                                                                                                                                                                                                                                                                                                                                                                                                                                                                                                                                                                                                                                                      |             |                                                                                                                                                                                         |       |                                       |             |         |             |                  |                           |                               |             |                             |             |                |                           |                               |             |      |  |  |  |  |  |  |  |  |  |  |  |      |    |     |  |  |  |       |      |  |  |  |  |  |  |  |       |        |        |  |  |  |  |  |  |            |      |  |  |  |  |      |  |  |  |  |  |  |  |  |  |  |  |             |      |  |                             |  |  |  |  |  |  |  |  |  |  |  |  |  |  |       |      |  |  |  |  |  |  |  |  |  |  |  |  |  |  |  |  |     |      |  |  |  |  |  |  |  |  |       |  |  |  |  |  |  |  |           |      |  |  |  |  |  |  |  |  |  |  |  |  |  |  |  |  |              |      |  |  |  |  |  |  |  |  |  |  |  |  |  |  |  |  |                                   |     |  |  |  |  |  |  |  |  |  |  |  |  |  |  |  |  |                       |      |  |  |  |  |  |  |  |  |  |  |  |  |  |  |  |  |            |     |  |  |  |  |  |  |  |  |  |  |  |  |  |  |  |  |                     |     |  |  |  |  |  |  |  |  |  |  |  |  |  |  |  |  |                     |     |  |  |  |  |  |  |  |  |  |  |  |  |  |  |  |  |
| $OE = \frac{RME}{AE} \times 100$                                                                                                                                                                                                                                                                                                                                                                                                                                                                                                                                                                                                                                                                                                                                                                                                                                                                                                                                                                                                                                                                                                                                                                                                                                                                                                                                                                                                                                                                                                                                                                                                                                                                                                                                                                                                                                                                                                                                                                                                                                                                                                                                                                                                                                                                                                                                                                                                                                                                                                                                                                                                                                                                                                             |             |                                                                                                                                                                                         |       |                                       |             |         |             |                  |                           |                               |             |                             |             |                |                           |                               |             |      |  |  |  |  |  |  |  |  |  |  |  |      |    |     |  |  |  |       |      |  |  |  |  |  |  |  |       |        |        |  |  |  |  |  |  |            |      |  |  |  |  |      |  |  |  |  |  |  |  |  |  |  |  |             |      |  |                             |  |  |  |  |  |  |  |  |  |  |  |  |  |  |       |      |  |  |  |  |  |  |  |  |  |  |  |  |  |  |  |  |     |      |  |  |  |  |  |  |  |  |       |  |  |  |  |  |  |  |           |      |  |  |  |  |  |  |  |  |  |  |  |  |  |  |  |  |              |      |  |  |  |  |  |  |  |  |  |  |  |  |  |  |  |  |                                   |     |  |  |  |  |  |  |  |  |  |  |  |  |  |  |  |  |                       |      |  |  |  |  |  |  |  |  |  |  |  |  |  |  |  |  |            |     |  |  |  |  |  |  |  |  |  |  |  |  |  |  |  |  |                     |     |  |  |  |  |  |  |  |  |  |  |  |  |  |  |  |  |                     |     |  |  |  |  |  |  |  |  |  |  |  |  |  |  |  |  |
| Solvents (First Pass)                                                                                                                                                                                                                                                                                                                                                                                                                                                                                                                                                                                                                                                                                                                                                                                                                                                                                                                                                                                                                                                                                                                                                                                                                                                                                                                                                                                                                                                                                                                                                                                                                                                                                                                                                                                                                                                                                                                                                                                                                                                                                                                                                                                                                                                                                                                                                                                                                                                                                                                                                                                                                                                                                                                        |             |                                                                                                                                                                                         |       |                                       |             |         |             |                  |                           |                               |             |                             |             |                |                           |                               |             |      |  |  |  |  |  |  |  |  |  |  |  |      |    |     |  |  |  |       |      |  |  |  |  |  |  |  |       |        |        |  |  |  |  |  |  |            |      |  |  |  |  |      |  |  |  |  |  |  |  |  |  |  |  |             |      |  |                             |  |  |  |  |  |  |  |  |  |  |  |  |  |  |       |      |  |  |  |  |  |  |  |  |  |  |  |  |  |  |  |  |     |      |  |  |  |  |  |  |  |  |       |  |  |  |  |  |  |  |           |      |  |  |  |  |  |  |  |  |  |  |  |  |  |  |  |  |              |      |  |  |  |  |  |  |  |  |  |  |  |  |  |  |  |  |                                   |     |  |  |  |  |  |  |  |  |  |  |  |  |  |  |  |  |                       |      |  |  |  |  |  |  |  |  |  |  |  |  |  |  |  |  |            |     |  |  |  |  |  |  |  |  |  |  |  |  |  |  |  |  |                     |     |  |  |  |  |  |  |  |  |  |  |  |  |  |  |  |  |                     |     |  |  |  |  |  |  |  |  |  |  |  |  |  |  |  |  |
| List solvents below                                                                                                                                                                                                                                                                                                                                                                                                                                                                                                                                                                                                                                                                                                                                                                                                                                                                                                                                                                                                                                                                                                                                                                                                                                                                                                                                                                                                                                                                                                                                                                                                                                                                                                                                                                                                                                                                                                                                                                                                                                                                                                                                                                                                                                                                                                                                                                                                                                                                                                                                                                                                                                                                                                                          |             |                                                                                                                                                                                         |       |                                       |             |         |             |                  |                           |                               |             |                             |             |                |                           |                               |             |      |  |  |  |  |  |  |  |  |  |  |  |      |    |     |  |  |  |       |      |  |  |  |  |  |  |  |       |        |        |  |  |  |  |  |  |            |      |  |  |  |  |      |  |  |  |  |  |  |  |  |  |  |  |             |      |  |                             |  |  |  |  |  |  |  |  |  |  |  |  |  |  |       |      |  |  |  |  |  |  |  |  |  |  |  |  |  |  |  |  |     |      |  |  |  |  |  |  |  |  |       |  |  |  |  |  |  |  |           |      |  |  |  |  |  |  |  |  |  |  |  |  |  |  |  |  |              |      |  |  |  |  |  |  |  |  |  |  |  |  |  |  |  |  |                                   |     |  |  |  |  |  |  |  |  |  |  |  |  |  |  |  |  |                       |      |  |  |  |  |  |  |  |  |  |  |  |  |  |  |  |  |            |     |  |  |  |  |  |  |  |  |  |  |  |  |  |  |  |  |                     |     |  |  |  |  |  |  |  |  |  |  |  |  |  |  |  |  |                     |     |  |  |  |  |  |  |  |  |  |  |  |  |  |  |  |  |
| Preferred solvents                                                                                                                                                                                                                                                                                                                                                                                                                                                                                                                                                                                                                                                                                                                                                                                                                                                                                                                                                                                                                                                                                                                                                                                                                                                                                                                                                                                                                                                                                                                                                                                                                                                                                                                                                                                                                                                                                                                                                                                                                                                                                                                                                                                                                                                                                                                                                                                                                                                                                                                                                                                                                                                                                                                           |             | water, EtOH, nBuOH, AcOipr, AcOnBu, PhOMe, MeOH, tBuOH, BnOH, ethylene glycol, acetone, MEK, MIBK, AcOEt, sulfolane                                                                     |       |                                       |             |         |             |                  |                           |                               |             |                             |             |                |                           | i-PrOH                        |             |      |  |  |  |  |  |  |  |  |  |  |  |      |    |     |  |  |  |       |      |  |  |  |  |  |  |  |       |        |        |  |  |  |  |  |  |            |      |  |  |  |  |      |  |  |  |  |  |  |  |  |  |  |  |             |      |  |                             |  |  |  |  |  |  |  |  |  |  |  |  |  |  |       |      |  |  |  |  |  |  |  |  |  |  |  |  |  |  |  |  |     |      |  |  |  |  |  |  |  |  |       |  |  |  |  |  |  |  |           |      |  |  |  |  |  |  |  |  |  |  |  |  |  |  |  |  |              |      |  |  |  |  |  |  |  |  |  |  |  |  |  |  |  |  |                                   |     |  |  |  |  |  |  |  |  |  |  |  |  |  |  |  |  |                       |      |  |  |  |  |  |  |  |  |  |  |  |  |  |  |  |  |            |     |  |  |  |  |  |  |  |  |  |  |  |  |  |  |  |  |                     |     |  |  |  |  |  |  |  |  |  |  |  |  |  |  |  |  |                     |     |  |  |  |  |  |  |  |  |  |  |  |  |  |  |  |  |
| Problematic solvents: (acceptable only if substitution does not offer advantages)                                                                                                                                                                                                                                                                                                                                                                                                                                                                                                                                                                                                                                                                                                                                                                                                                                                                                                                                                                                                                                                                                                                                                                                                                                                                                                                                                                                                                                                                                                                                                                                                                                                                                                                                                                                                                                                                                                                                                                                                                                                                                                                                                                                                                                                                                                                                                                                                                                                                                                                                                                                                                                                            |             | DMSO, cyclohexanone, DMPU, AcOH, Ac <sub>2</sub> O, Acetonitrile, AcOMe, THF, heptane, Me-cyclohexane, toluene, xylene, MTBE, cyclohexane, chlorobenzene, formic acid, pyridine, Me-THF |       |                                       |             |         |             |                  |                           |                               |             |                             |             |                |                           |                               |             |      |  |  |  |  |  |  |  |  |  |  |  |      |    |     |  |  |  |       |      |  |  |  |  |  |  |  |       |        |        |  |  |  |  |  |  |            |      |  |  |  |  |      |  |  |  |  |  |  |  |  |  |  |  |             |      |  |                             |  |  |  |  |  |  |  |  |  |  |  |  |  |  |       |      |  |  |  |  |  |  |  |  |  |  |  |  |  |  |  |  |     |      |  |  |  |  |  |  |  |  |       |  |  |  |  |  |  |  |           |      |  |  |  |  |  |  |  |  |  |  |  |  |  |  |  |  |              |      |  |  |  |  |  |  |  |  |  |  |  |  |  |  |  |  |                                   |     |  |  |  |  |  |  |  |  |  |  |  |  |  |  |  |  |                       |      |  |  |  |  |  |  |  |  |  |  |  |  |  |  |  |  |            |     |  |  |  |  |  |  |  |  |  |  |  |  |  |  |  |  |                     |     |  |  |  |  |  |  |  |  |  |  |  |  |  |  |  |  |                     |     |  |  |  |  |  |  |  |  |  |  |  |  |  |  |  |  |
| Hazardous solvents: These solvents have significant health and/or safety concerns.                                                                                                                                                                                                                                                                                                                                                                                                                                                                                                                                                                                                                                                                                                                                                                                                                                                                                                                                                                                                                                                                                                                                                                                                                                                                                                                                                                                                                                                                                                                                                                                                                                                                                                                                                                                                                                                                                                                                                                                                                                                                                                                                                                                                                                                                                                                                                                                                                                                                                                                                                                                                                                                           |             | dioxane, pentane, TEA, diisopropyl ether, DME, DCM, DMF, DMA, NMP, methoxyethanol, hexane                                                                                               |       |                                       |             |         |             |                  |                           |                               |             |                             |             |                |                           |                               |             |      |  |  |  |  |  |  |  |  |  |  |  |      |    |     |  |  |  |       |      |  |  |  |  |  |  |  |       |        |        |  |  |  |  |  |  |            |      |  |  |  |  |      |  |  |  |  |  |  |  |  |  |  |  |             |      |  |                             |  |  |  |  |  |  |  |  |  |  |  |  |  |  |       |      |  |  |  |  |  |  |  |  |  |  |  |  |  |  |  |  |     |      |  |  |  |  |  |  |  |  |       |  |  |  |  |  |  |  |           |      |  |  |  |  |  |  |  |  |  |  |  |  |  |  |  |  |              |      |  |  |  |  |  |  |  |  |  |  |  |  |  |  |  |  |                                   |     |  |  |  |  |  |  |  |  |  |  |  |  |  |  |  |  |                       |      |  |  |  |  |  |  |  |  |  |  |  |  |  |  |  |  |            |     |  |  |  |  |  |  |  |  |  |  |  |  |  |  |  |  |                     |     |  |  |  |  |  |  |  |  |  |  |  |  |  |  |  |  |                     |     |  |  |  |  |  |  |  |  |  |  |  |  |  |  |  |  |
| Highly hazardous solvents: The solvents which are agreed not to be used, even in screening                                                                                                                                                                                                                                                                                                                                                                                                                                                                                                                                                                                                                                                                                                                                                                                                                                                                                                                                                                                                                                                                                                                                                                                                                                                                                                                                                                                                                                                                                                                                                                                                                                                                                                                                                                                                                                                                                                                                                                                                                                                                                                                                                                                                                                                                                                                                                                                                                                                                                                                                                                                                                                                   |             | Et <sub>2</sub> O, Benzene, CCl <sub>4</sub> , chloroform, DCE, nitromethane, CS <sub>2</sub> , HMPA                                                                                    |       |                                       |             |         |             |                  |                           |                               |             |                             |             |                |                           |                               |             |      |  |  |  |  |  |  |  |  |  |  |  |      |    |     |  |  |  |       |      |  |  |  |  |  |  |  |       |        |        |  |  |  |  |  |  |            |      |  |  |  |  |      |  |  |  |  |  |  |  |  |  |  |  |             |      |  |                             |  |  |  |  |  |  |  |  |  |  |  |  |  |  |       |      |  |  |  |  |  |  |  |  |  |  |  |  |  |  |  |  |     |      |  |  |  |  |  |  |  |  |       |  |  |  |  |  |  |  |           |      |  |  |  |  |  |  |  |  |  |  |  |  |  |  |  |  |              |      |  |  |  |  |  |  |  |  |  |  |  |  |  |  |  |  |                                   |     |  |  |  |  |  |  |  |  |  |  |  |  |  |  |  |  |                       |      |  |  |  |  |  |  |  |  |  |  |  |  |  |  |  |  |            |     |  |  |  |  |  |  |  |  |  |  |  |  |  |  |  |  |                     |     |  |  |  |  |  |  |  |  |  |  |  |  |  |  |  |  |                     |     |  |  |  |  |  |  |  |  |  |  |  |  |  |  |  |  |

| Catalyst/enzyme (First Pass)                                                    |            | Tick |                                    |            | Tick |
|---------------------------------------------------------------------------------|------------|------|------------------------------------|------------|------|
| Catalyst or enzyme used, or reaction takes place without any catalyst/reagents. | Green Flag | *    | Facile recovery of catalyst/enzyme | Green Flag | *    |
| Use of stoichiometric quantities of reagents                                    | Amber Flag |      | catalyst/enzyme not recovered      | Amber Flag |      |
| Use of reagents in excess                                                       | Red Flag   |      |                                    |            |      |

### Critical elements

| Supply remaining | Flag colour | Note element |
|------------------|-------------|--------------|
| 5-50 years       | Red Flag    |              |
| 50-500 years     | Amber Flag  | Ni           |
| +500 years       | Green Flag  |              |

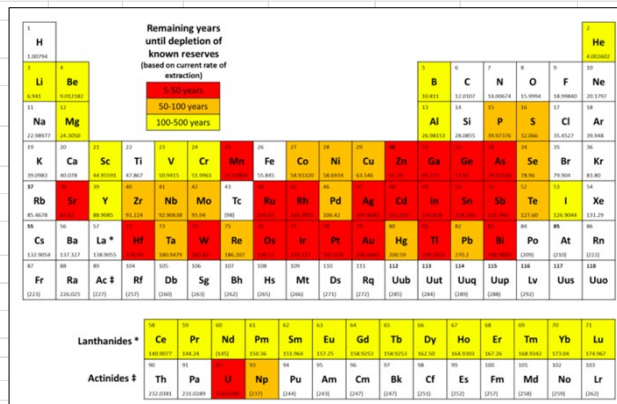

| Energy (First Pass)                          |            | Tick |
|----------------------------------------------|------------|------|
| Reaction run between 0 to 70°C               | Green Flag | *    |
| Reaction run between -20 to 0 or 70 to 140°C | Amber Flag |      |
| Reaction run below -20 or above 140°C        | Red Flag   |      |

|                                                          |            |      |
|----------------------------------------------------------|------------|------|
| Reaction run at reflux                                   | Red Flag   | Tick |
| Reaction run 5°C or more below the solvent boiling point | Green Flag | *    |

| Batch/flow |            | Tick |
|------------|------------|------|
| Flow       | Green Flag |      |
| Batch      | Amber Flag | *    |

| Work Up                                                                                                                                  |            | List                     |
|------------------------------------------------------------------------------------------------------------------------------------------|------------|--------------------------|
| quenching<br>filtration                                                                                                                  | Green Flag |                          |
| centrifugation<br>crystallisation                                                                                                        |            |                          |
| Low temperature distillation/evaporation/<br>sublimation (< 140 °C at atmospheric<br>solvent exchange, quenching into aqueous<br>solvent |            | Amber Flag               |
| chromatography/ion exchange<br>high temperature<br>multiple recrystallisation                                                            | Red Flag   | Column<br>Chromatography |

| Health & safety            | Red Flag                     | Amber Flag                   | Green Flag                                                 | List substances and H-codes | List substances and H-codes | List substances and H-codes               |
|----------------------------|------------------------------|------------------------------|------------------------------------------------------------|-----------------------------|-----------------------------|-------------------------------------------|
| Highly explosive           | H200, H201, H202, H203       | H205, H220, H224             | If no red or amber flagged H codes present then green flag | None                        | None                        | Methoxy benzyl alcohol: H315, H-317, H319 |
| Explosive thermal runaway  | H230, H240, H250             | H241                         |                                                            |                             |                             |                                           |
| Toxic                      | H300, H310, H330             | H301, H311, H331             |                                                            |                             |                             |                                           |
| Long Term toxicity         | H340, H350, H360, H370, H372 | H341, H351, H361, H371, H373 |                                                            |                             |                             |                                           |
| Environmental implications | H400, H410, H411, H420       | H401, H412                   | None                                                       | None                        |                             |                                           |

| Use of chemicals of environmental concern                                            |          | List substances of very high concern |
|--------------------------------------------------------------------------------------|----------|--------------------------------------|
| Chemical identified as Substances of Very High Concern by ChemSec which are utilised | Red Flag | None                                 |

## 5. Reference

1. Liang, D.; Yan, J.; Yin, X.; Wang, Y.; Du, J.; Qian, J.; He, M.; Zhou, W. J. C. S.; Technology, Effects of doping metal on the catalytic performance of manganese-based layered double hydroxides in the aerobic oxidation of alcohols. *Catal. Sci. Technol.* **2025**, *15* (19), 5876-5885.
2. Love, B. E. J. O. P.; International, P., Facile Preparation of 3, 6-Dimethoxy-2-nitrobenzaldehyde. *Org. Prep. Proced. Int.* **2024**, *56* (3), 302-306.
3. Liu, X.; Xia, Q.; Zhang, Y.; Chen, C.; Chen, W. J. T. J. o. O. C., Cu-NHC-TEMPO catalyzed aerobic oxidation of primary alcohols to aldehydes. *J. Org. Chem.* **2013**, *78* (17), 8531-8536.
4. Dutta, M.; Bora, J.; Kalita, A. j.; Suleman, A.; Chutia, U.; Chetia, B. J. A. A. N. M., Ag-Decorated NiFe<sub>2</sub>O<sub>4</sub> Magnetic Nanocomposites as Catalysts for the Synthesis of 5-Substituted 1 H-Tetrazoles and for the Selective Oxidation of Benzyl Alcohol to Benzaldehyde. *ACS Appl. Nano Mater.* **2025**, *8* (47), 22670-22682.
5. Kitt, M. I.; Amir, E.; Sloane, E. R.; Fraser, D. G.; Cerritelli, J. E.; Sabanos, C. S.; McNeely, J. H.; Snyder, J. K.; Doerrer, L. H.; Beeler, A. B. J. A. C., Chemoselective aerobic oxidation of alcohols utilizing a vanadium (V) catalyst. *ACS Catal.* **2024**, *14* (7), 4799-4806.
6. Geng, L.; Zheng, B.; Wang, X.; Zhang, W.; Wu, S.; Jia, M.; Yan, W.; Liu, G. J. C., Fe<sub>3</sub>O<sub>4</sub> nanoparticles anchored on carbon serve the dual role of catalyst and magnetically recoverable entity in the aerobic oxidation of alcohols. *ChemCatChem* **2016**, *8* (4), 805-811.
